# Supplementary material for: HIV-Exposed Seronegative Sex Workers Express Low T-Cell Activation and an Intact Ectocervical Tissue Microenvironment
Source: MDPI journal article supplement (doi:10.3390/vaccines9030217), 2021-03-04

# CTSG

cathepsin G

Antibody: HPA047737

p-value = 0.064

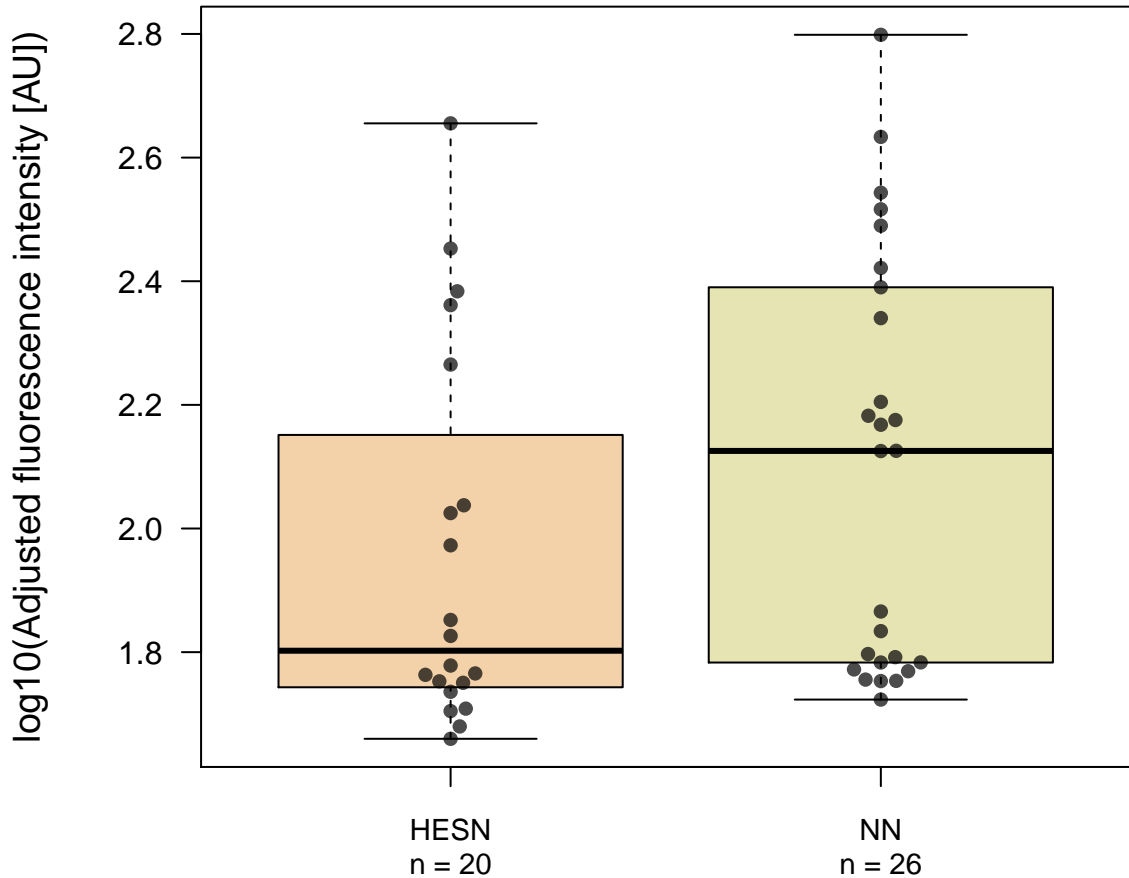

# DSC2

desmocollin 2

Antibody: HPA012615

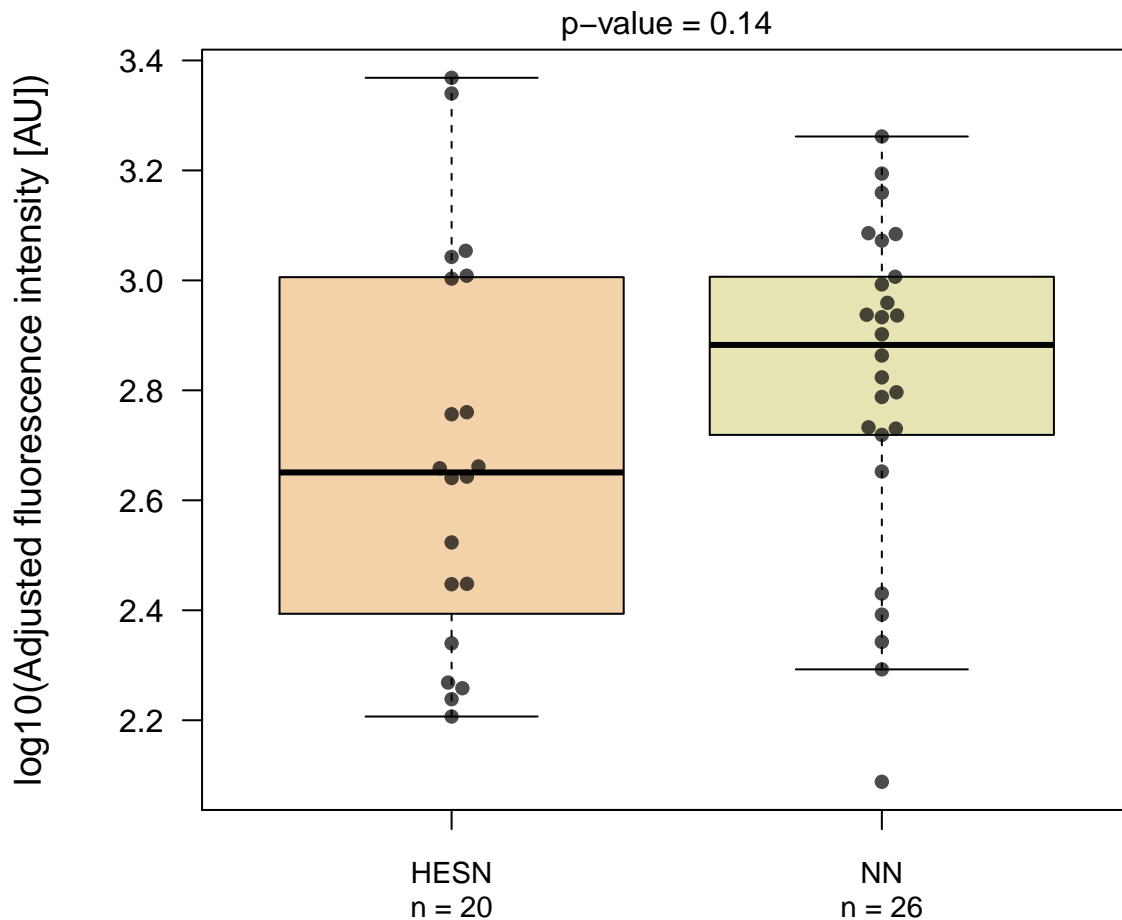

# TXNDC17

thioredoxin domain containing 17

Antibody: HPA022931

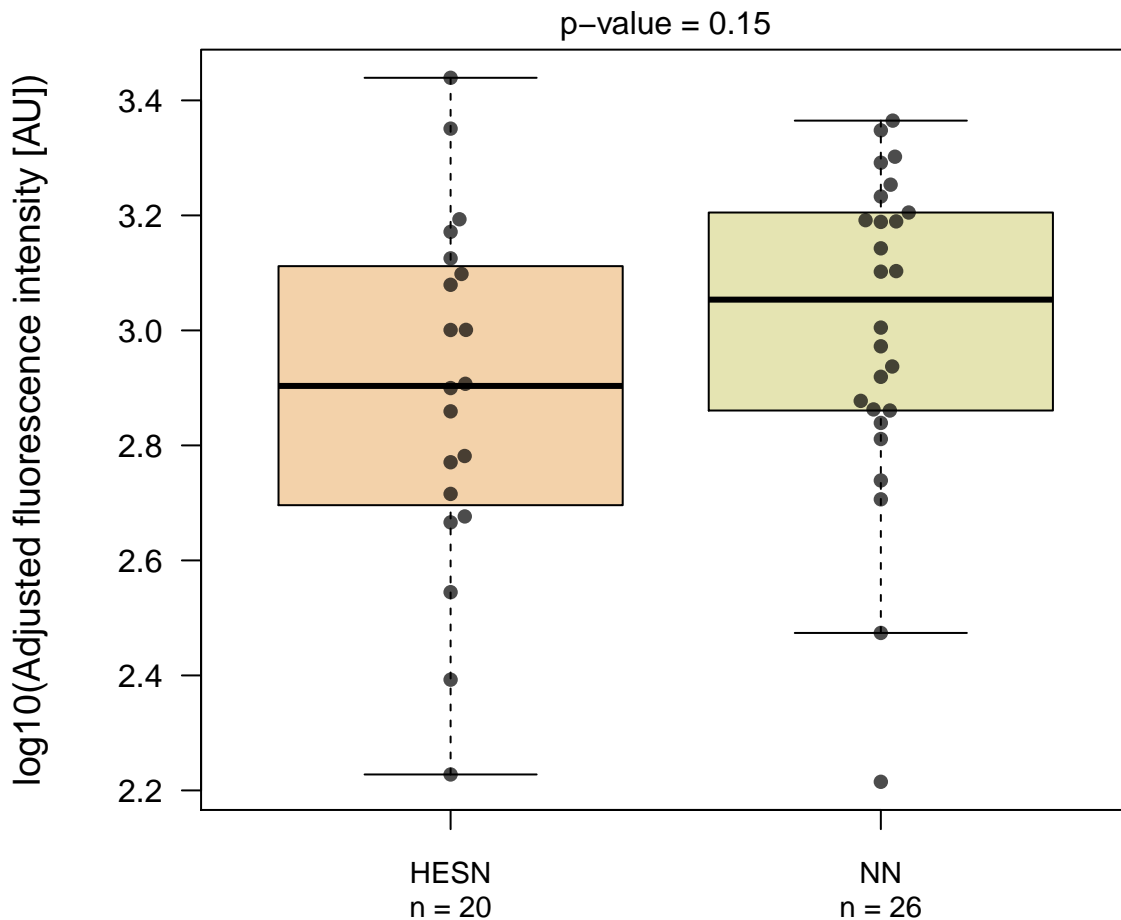

# FGA

fibrinogen alpha chain

Antibody: HPA064755

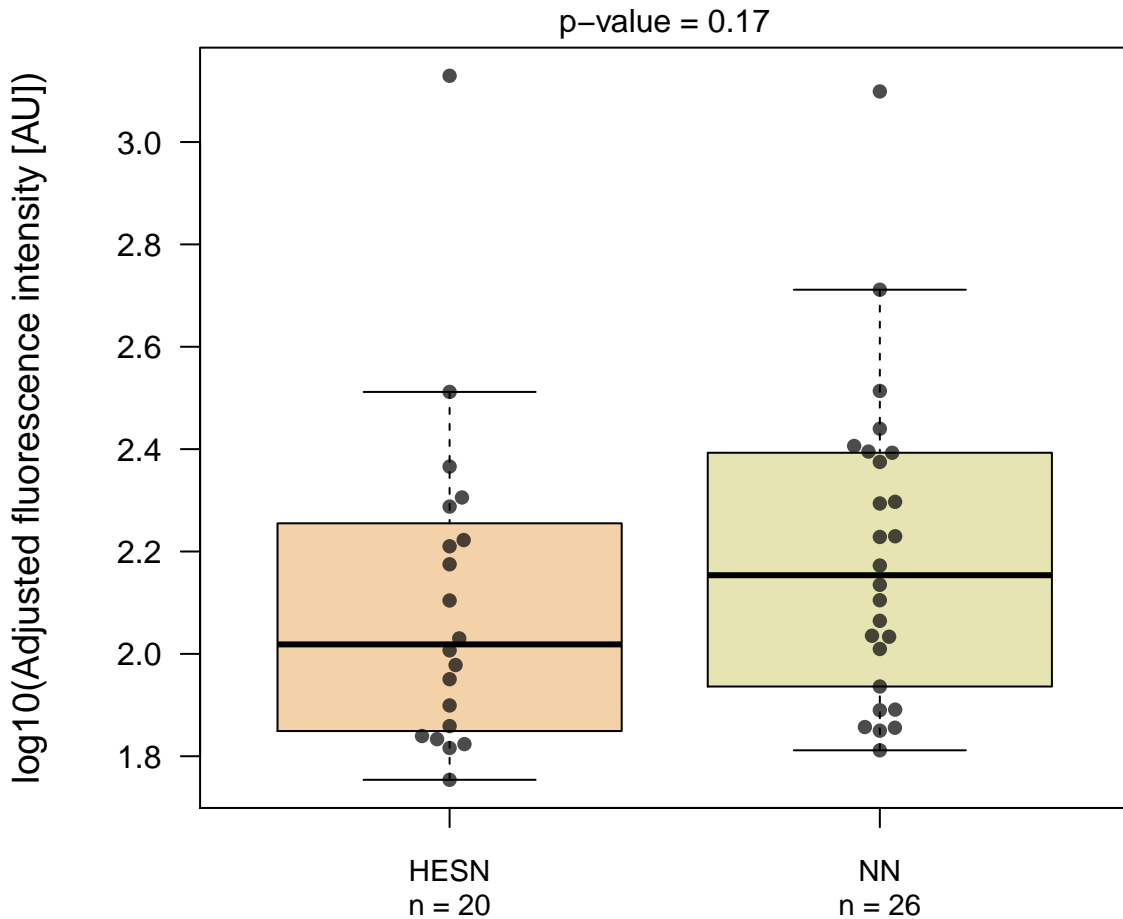

# LRG1

leucine rich alpha-2-glycoprotein 1

Antibody: HPA001888

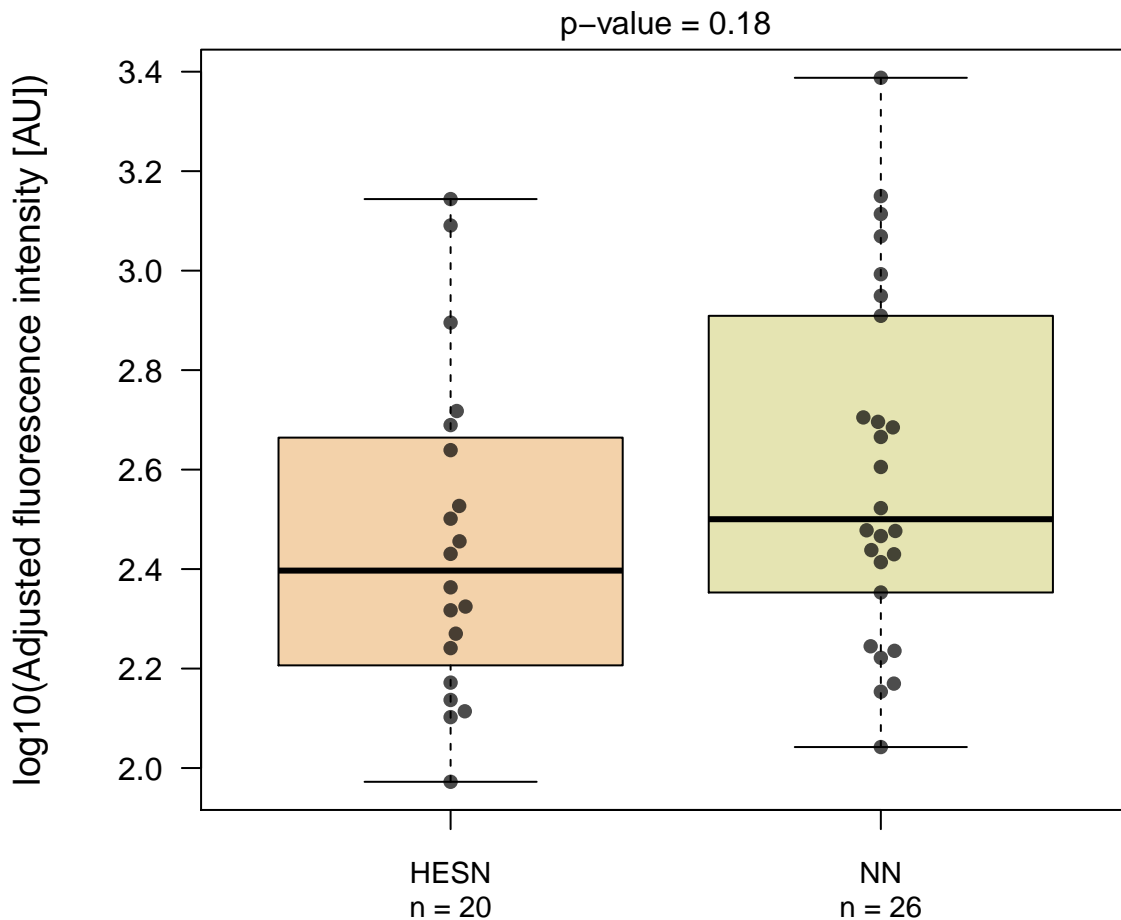

# FGA

fibrinogen alpha chain

Antibody: HPA051370

p-value = 0.19

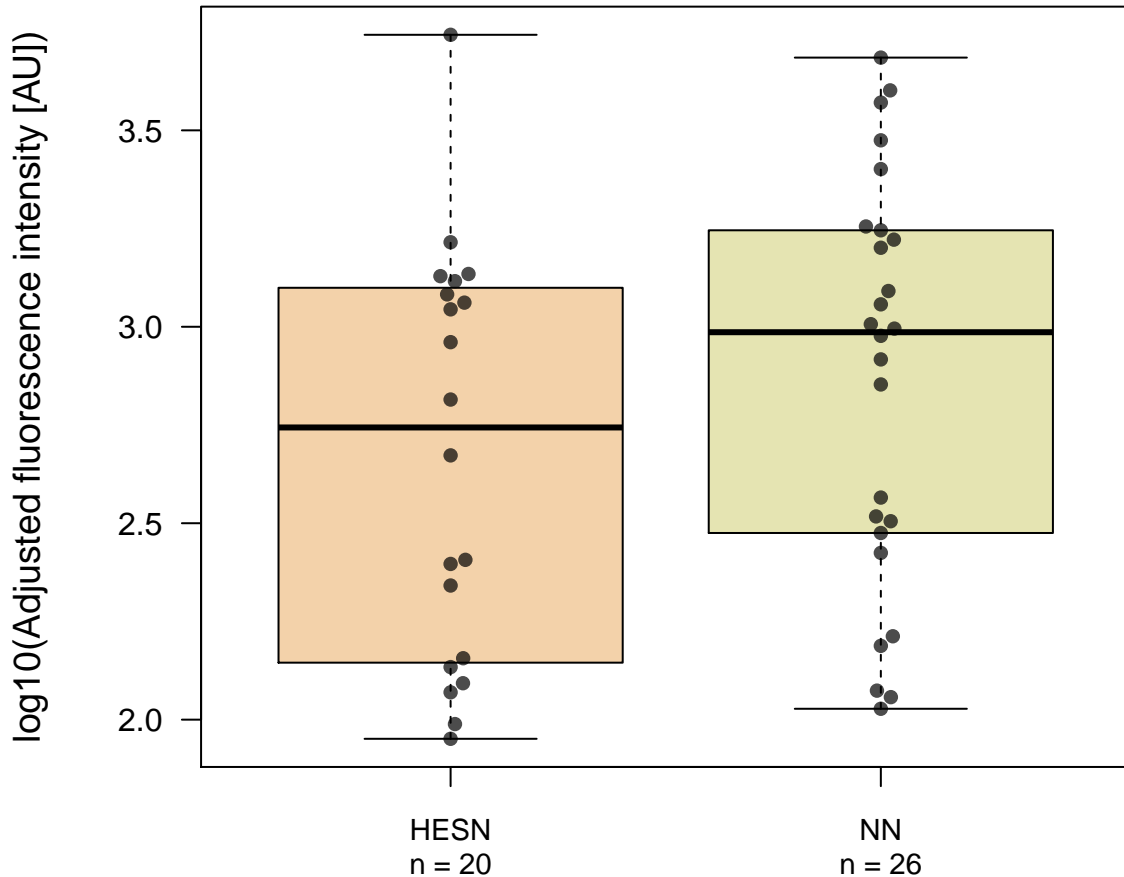

# DSG3

desmoglein 3

Antibody: HPA056863

p-value = 0.19

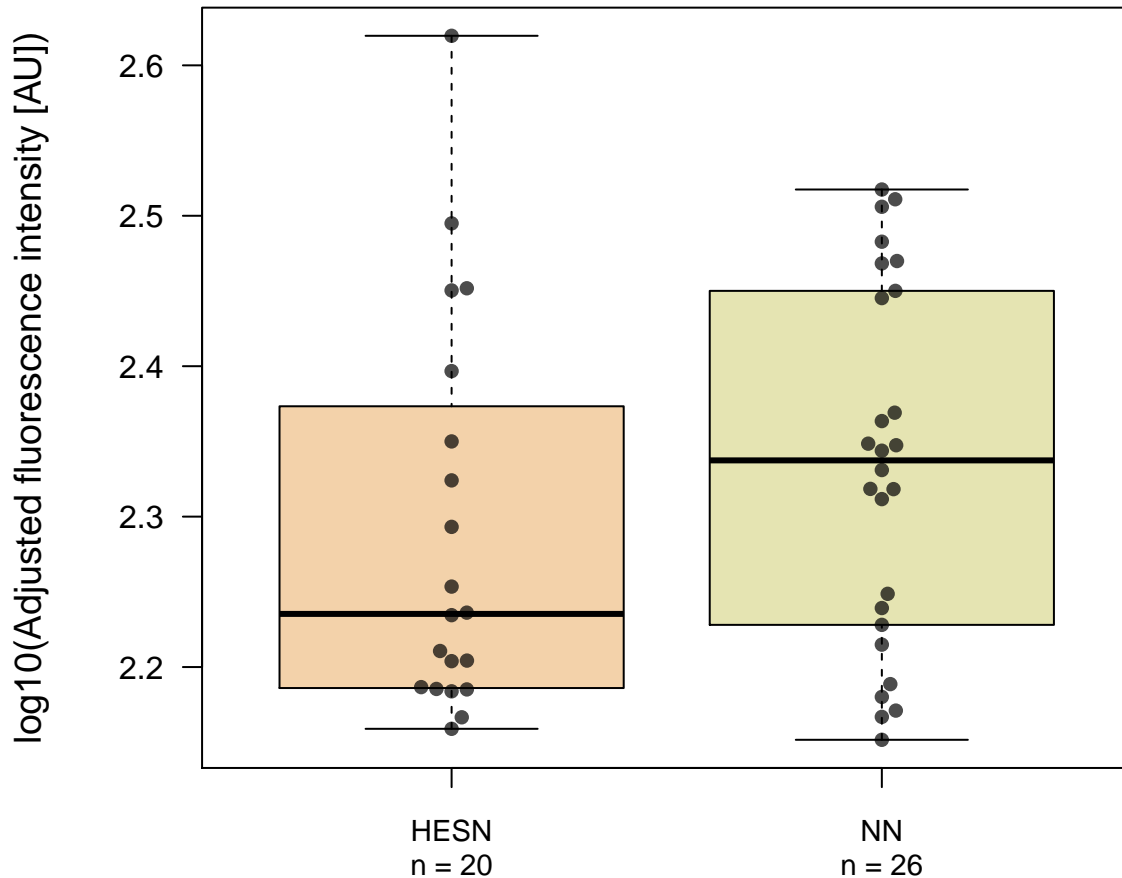

# DSG1

desmoglein 1

Antibody: HPA022128

p-value = 0.20

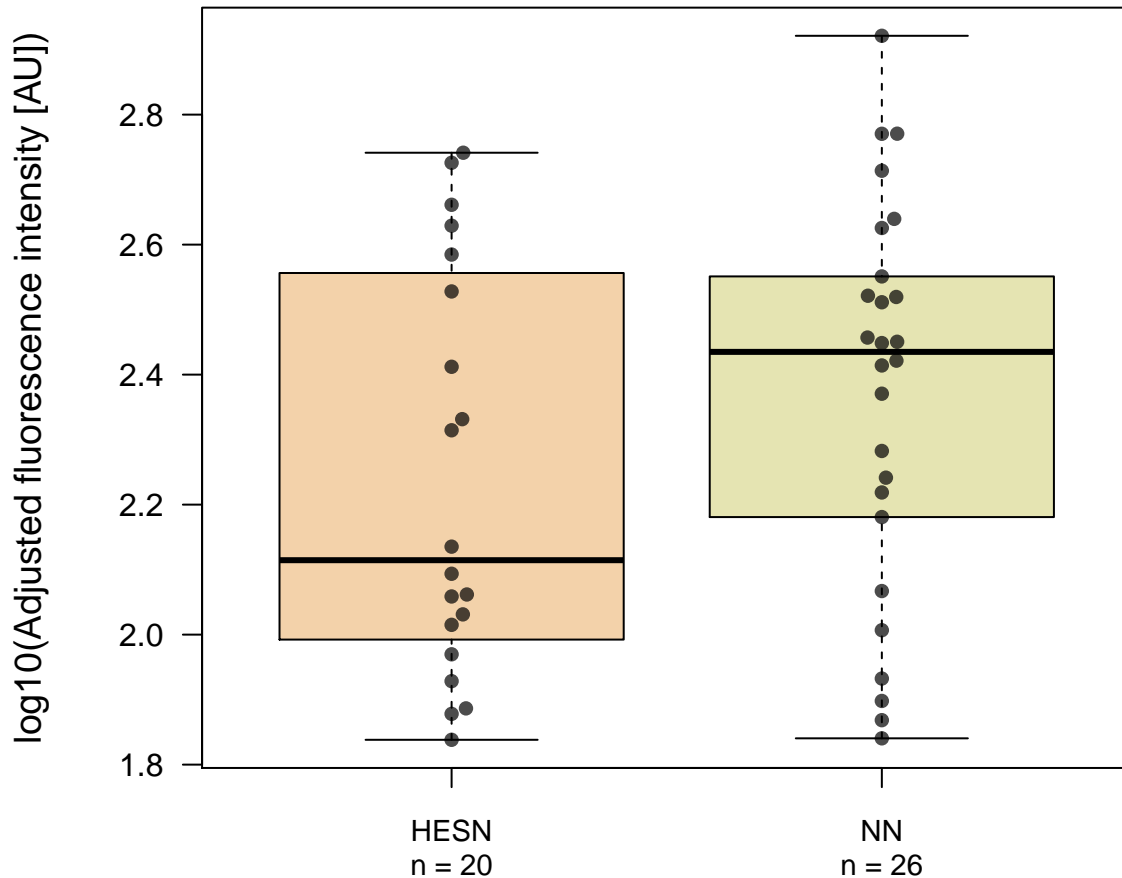



# CD5L

CD5 molecule like  
Antibody: HPA026432

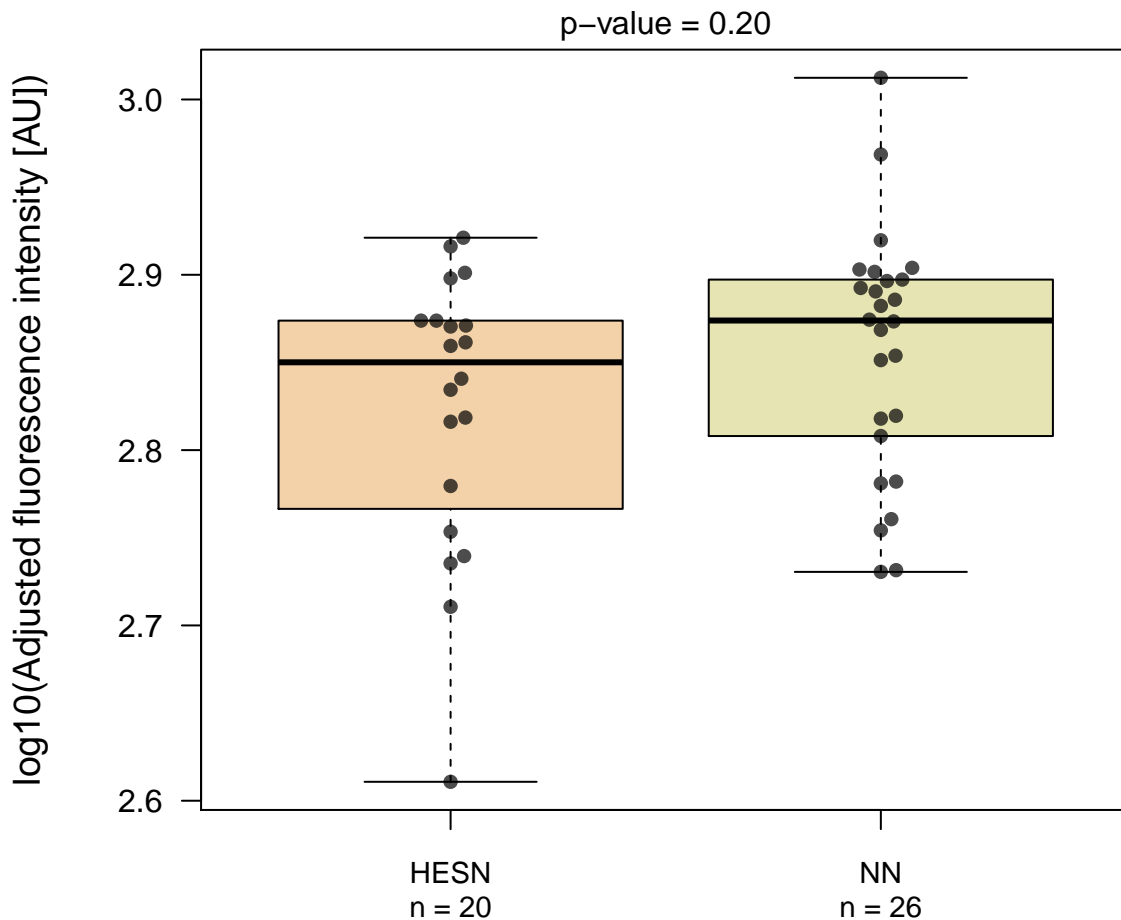

# KRT18

keratin 18

Antibody: HPA001605

p-value = 0.21

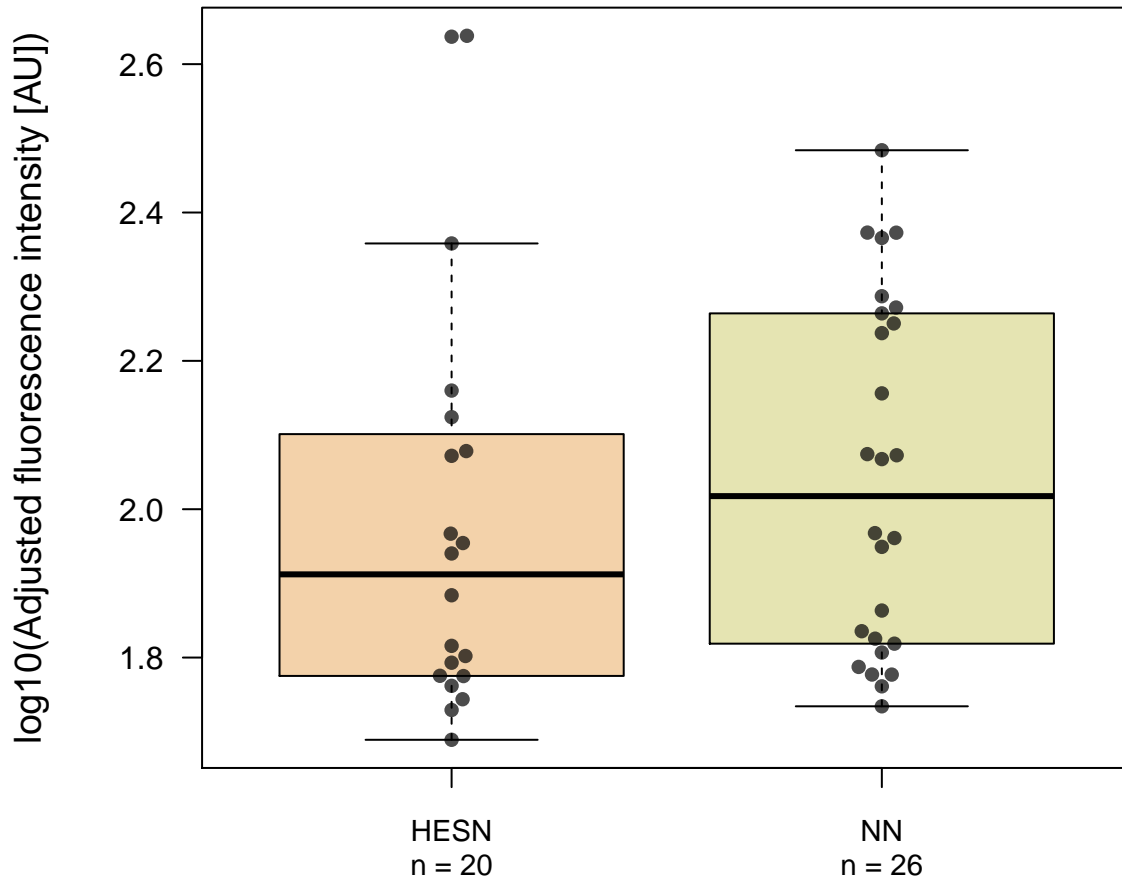

# AHSG

alpha 2-HS glycoprotein

Antibody: HPA001524

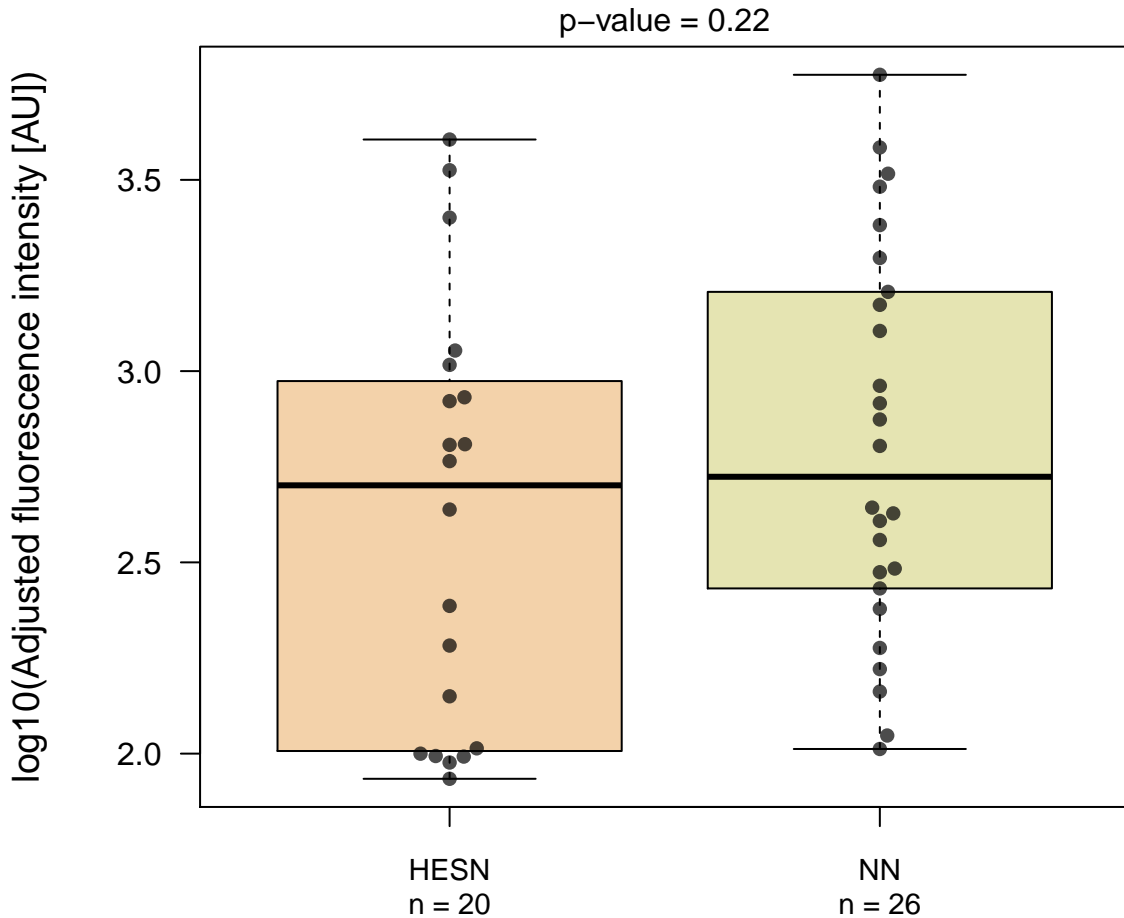

# SPRR3

small proline rich protein 3

Antibody: HPA024330

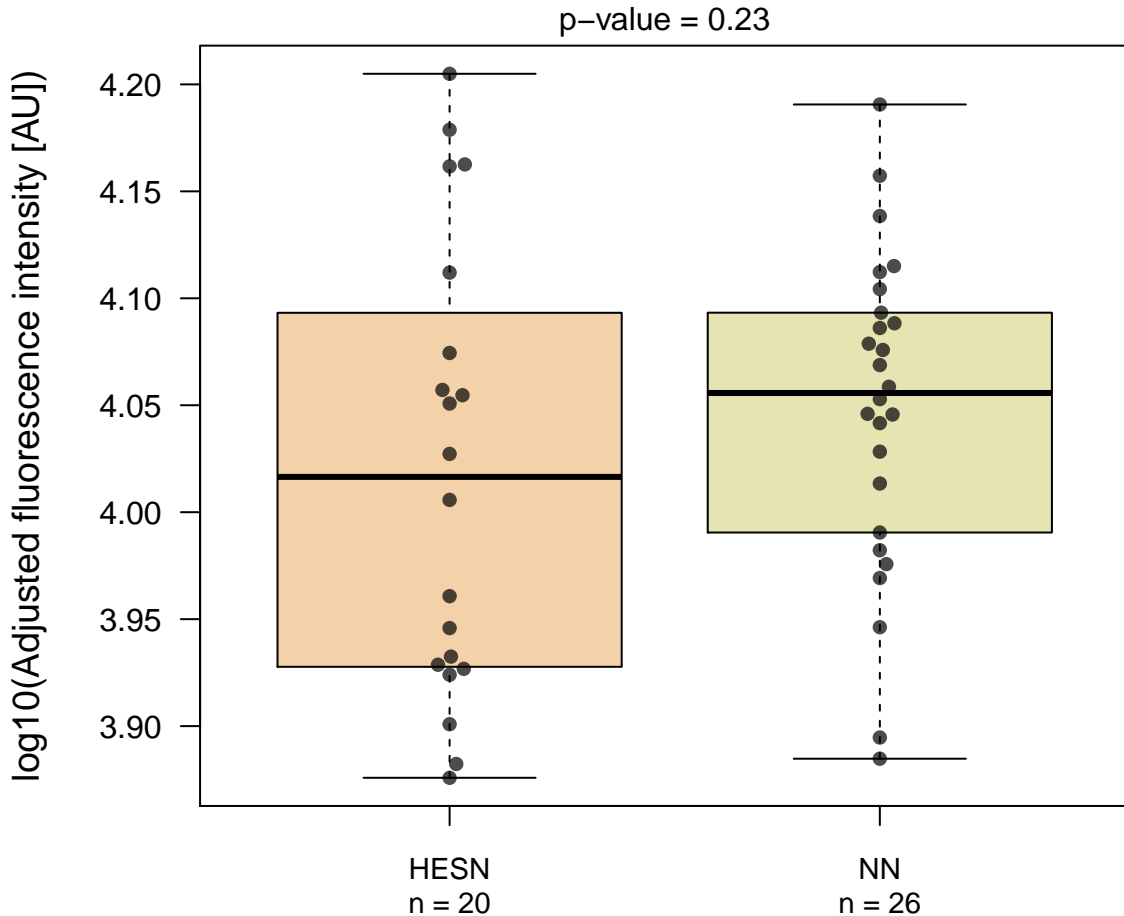

# KRT4

keratin 4

Antibody: HPA034881

p-value = 0.23

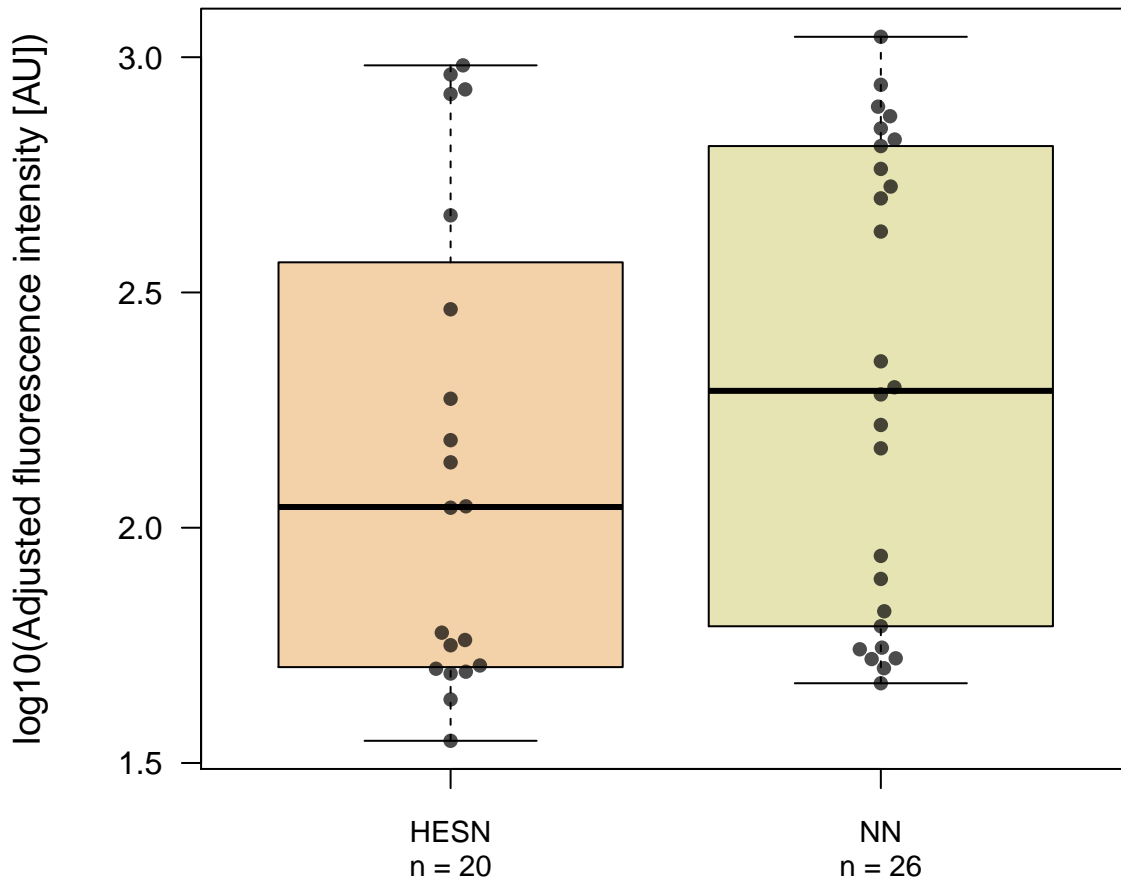

# S100A2

S100 calcium binding protein A2

Antibody: HPA034651

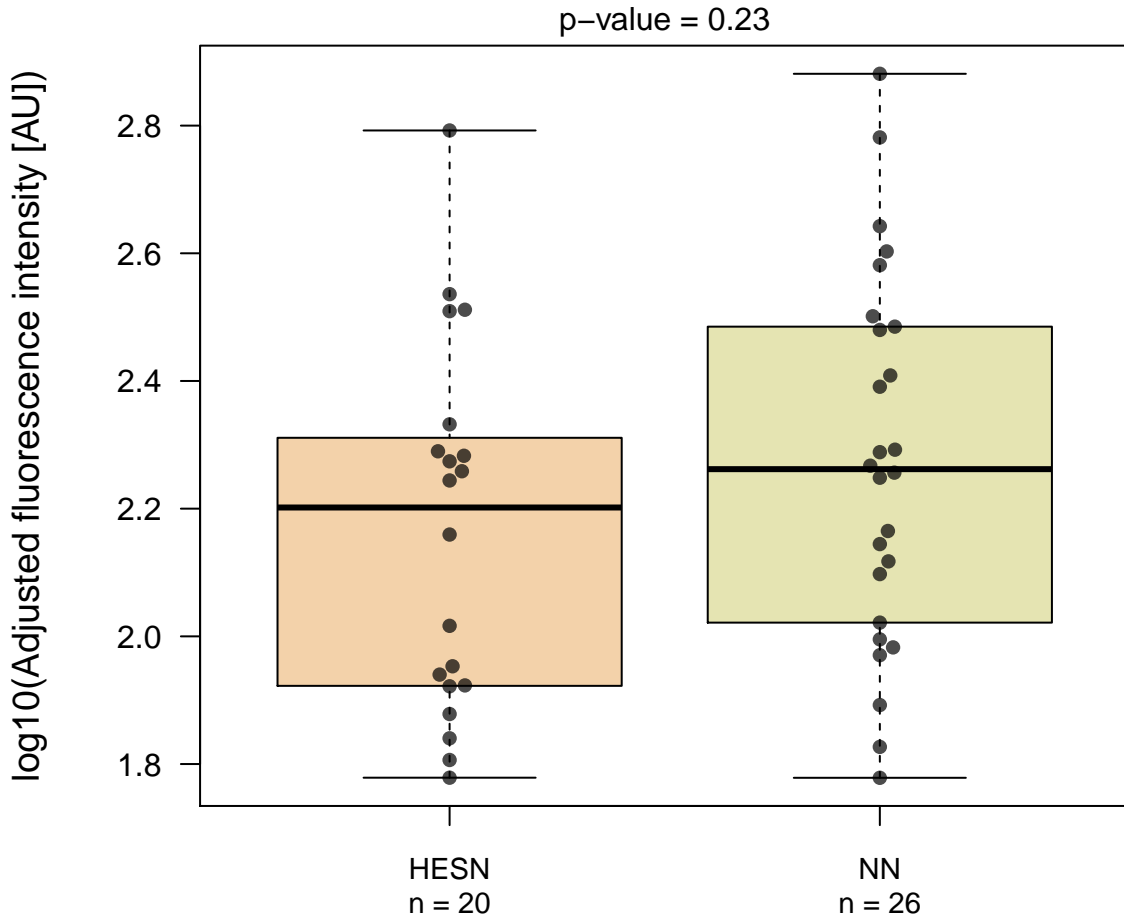

# CFH

complement factor H  
Antibody: HPA049176

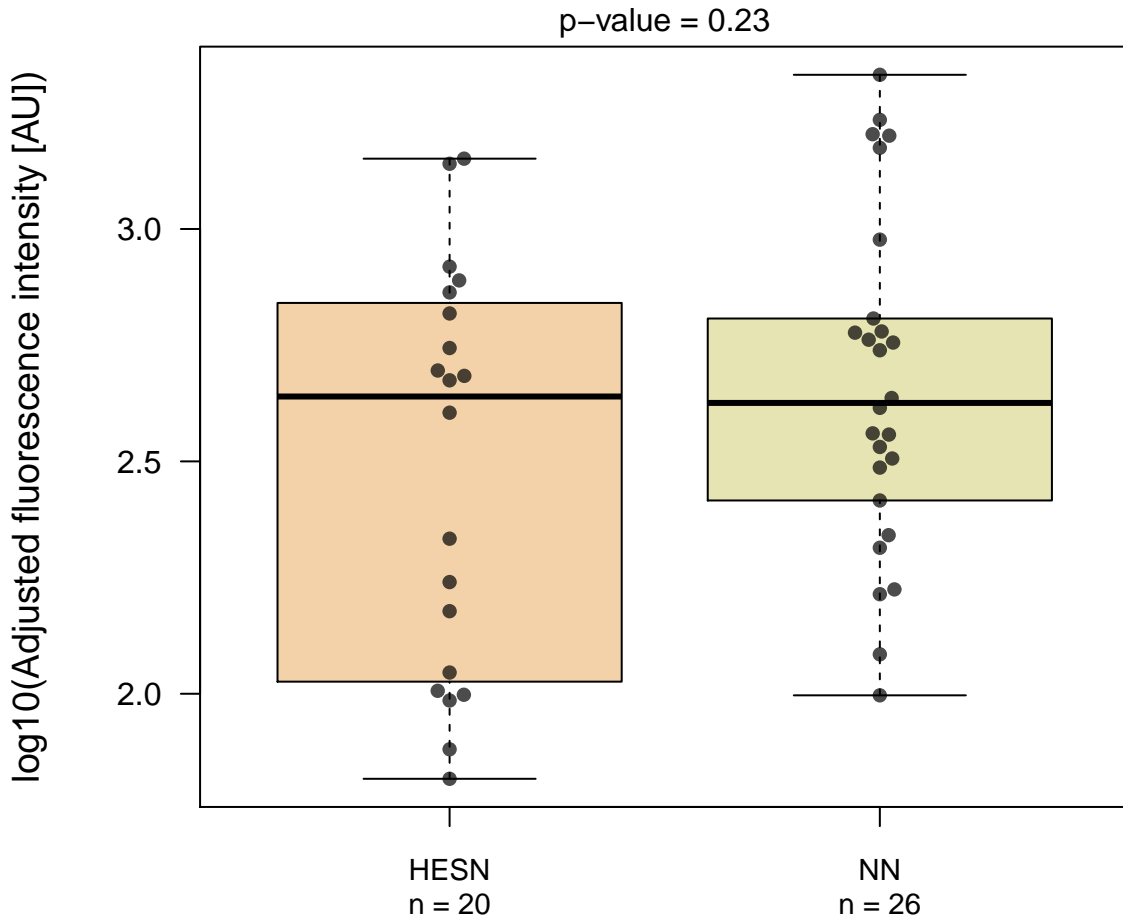

# KNG1

kininogen 1

Antibody: HPA001616

p-value = 0.24

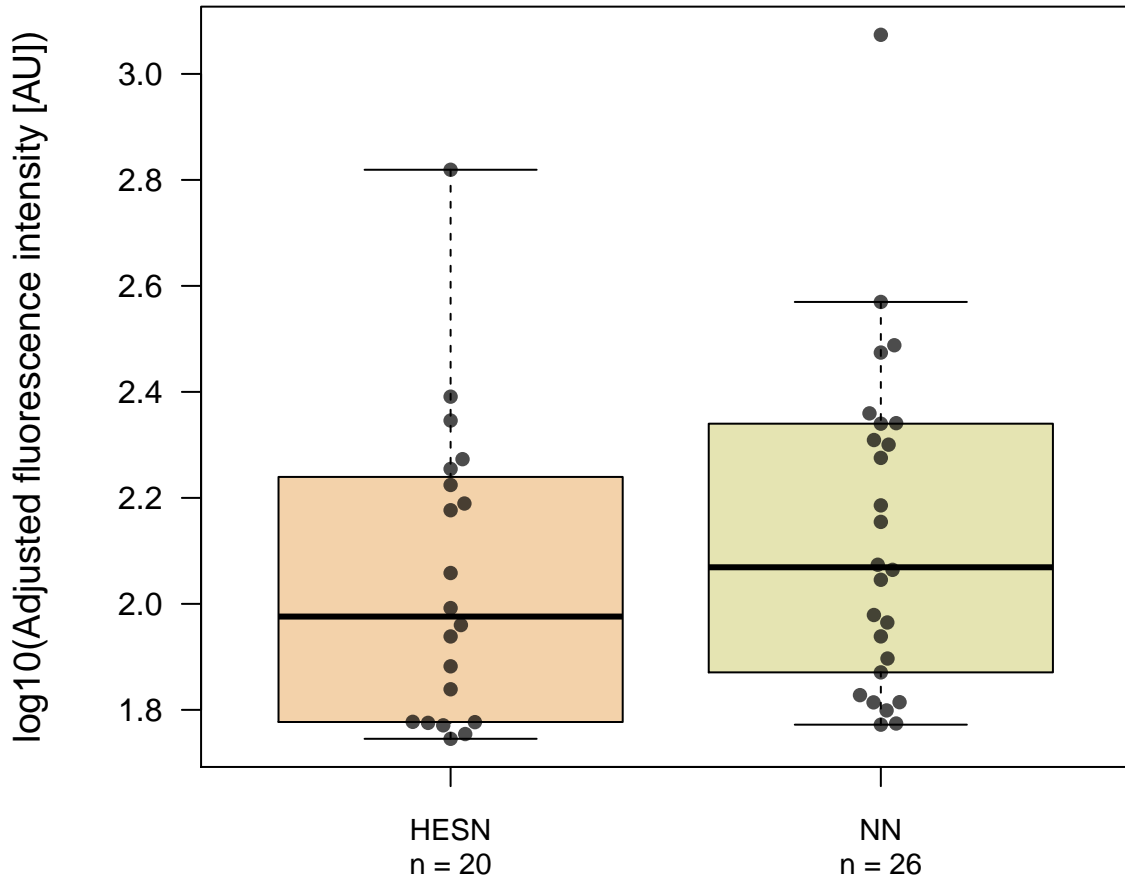



# FLNA

filamin A

Antibody: HPA002925

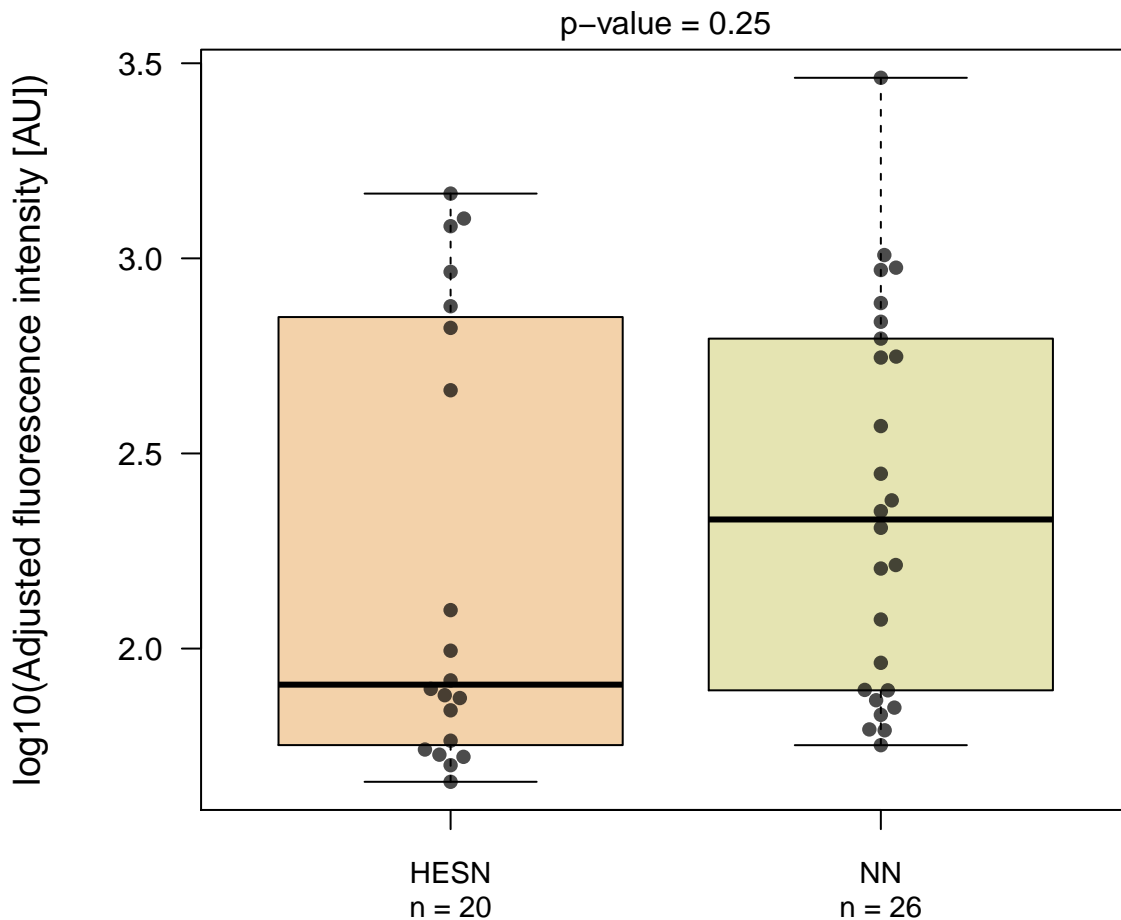

# MSN

moesin

Antibody: HPA011135

p-value = 0.25

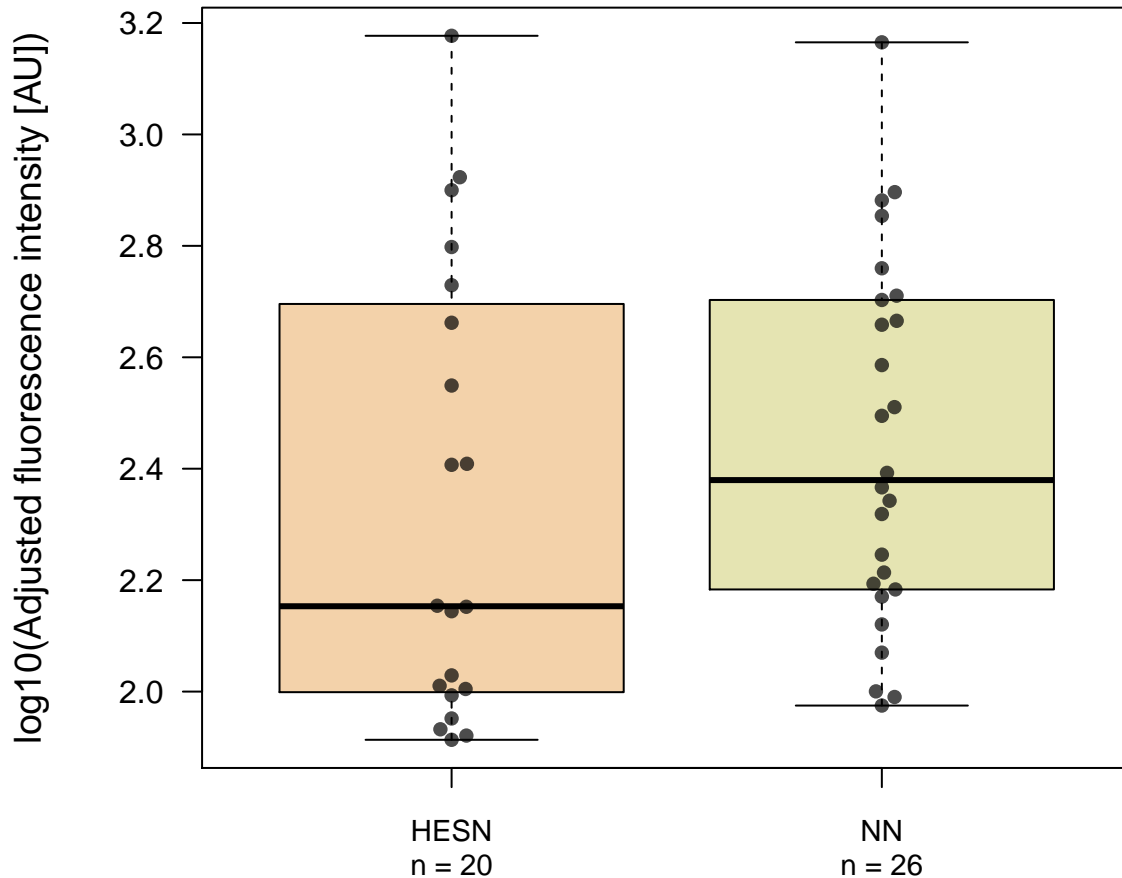

# SPRR3

small proline rich protein 3

Antibody: HPA044467

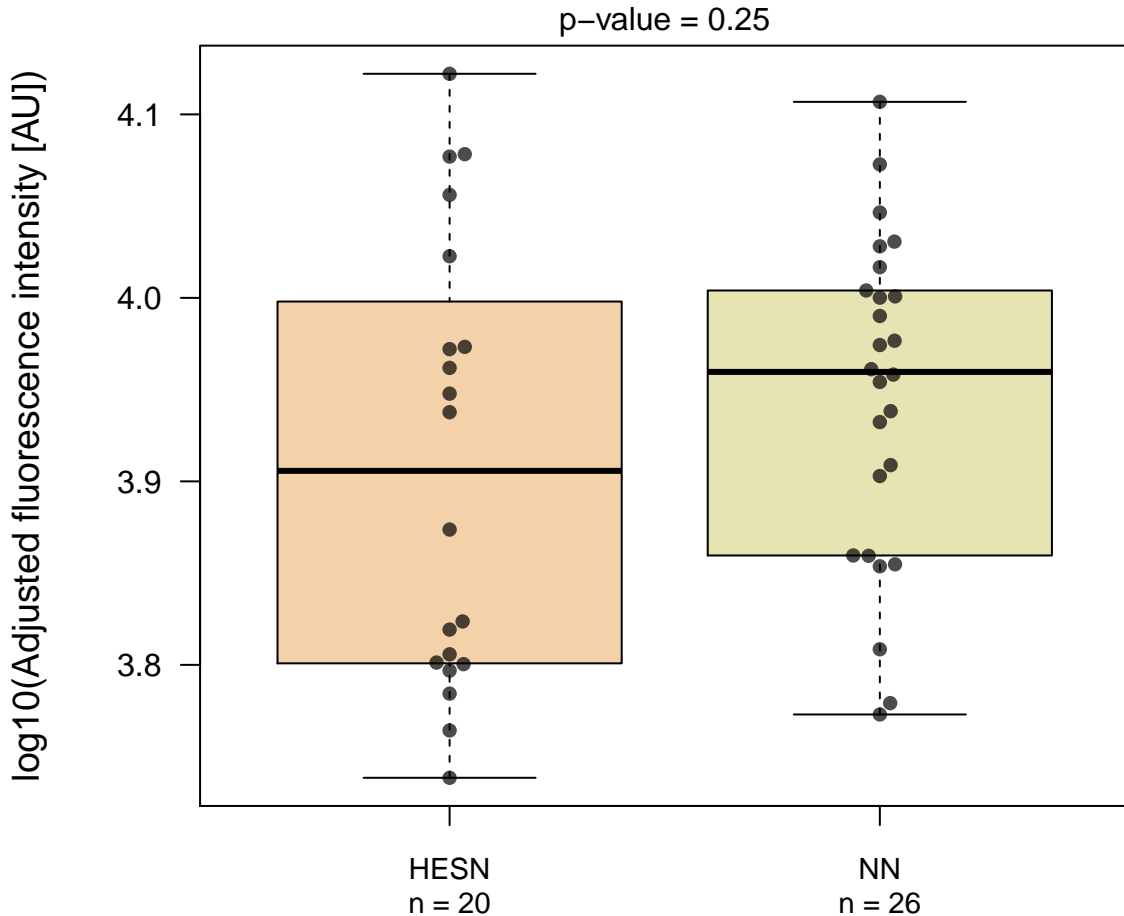

# MMP9

matrix metalloproteinase 9

Antibody: HPA063909

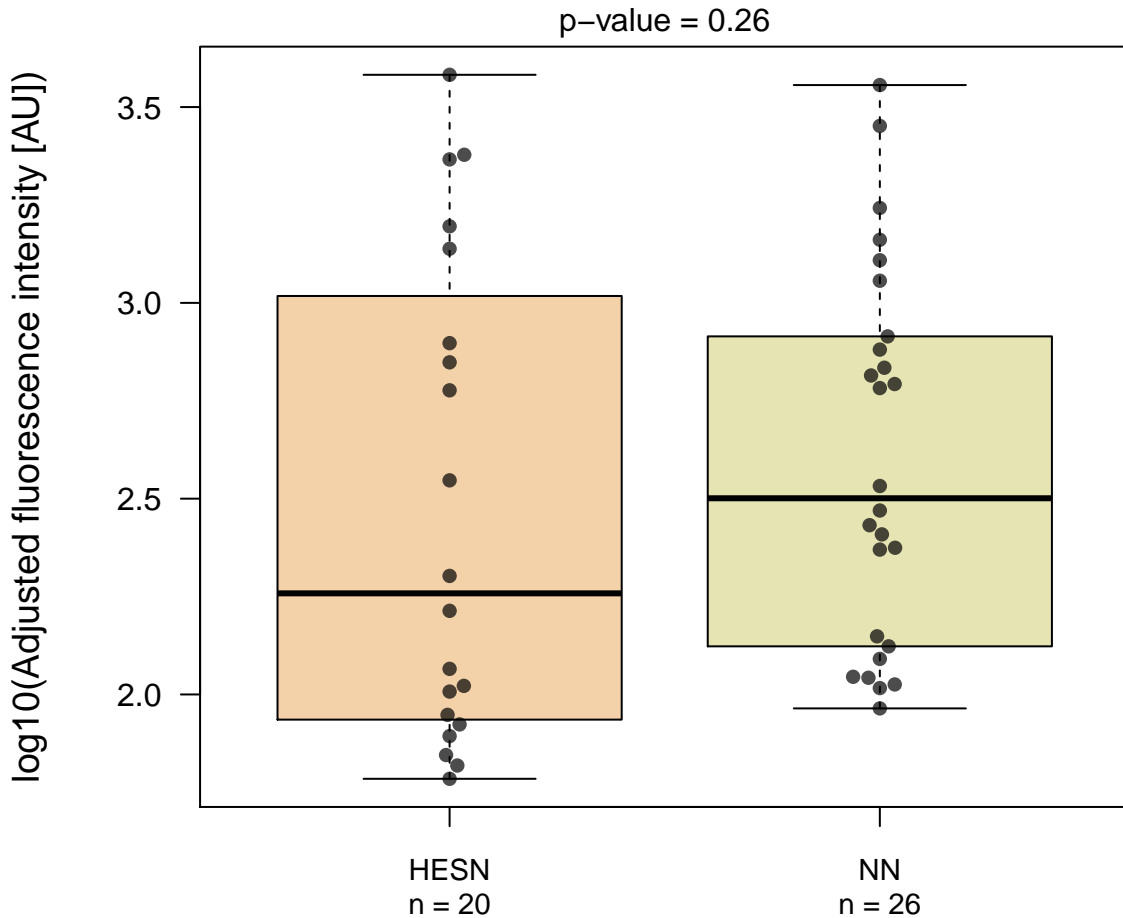

# SERPINA3

serpin family A member 3

Antibody: HPA000893

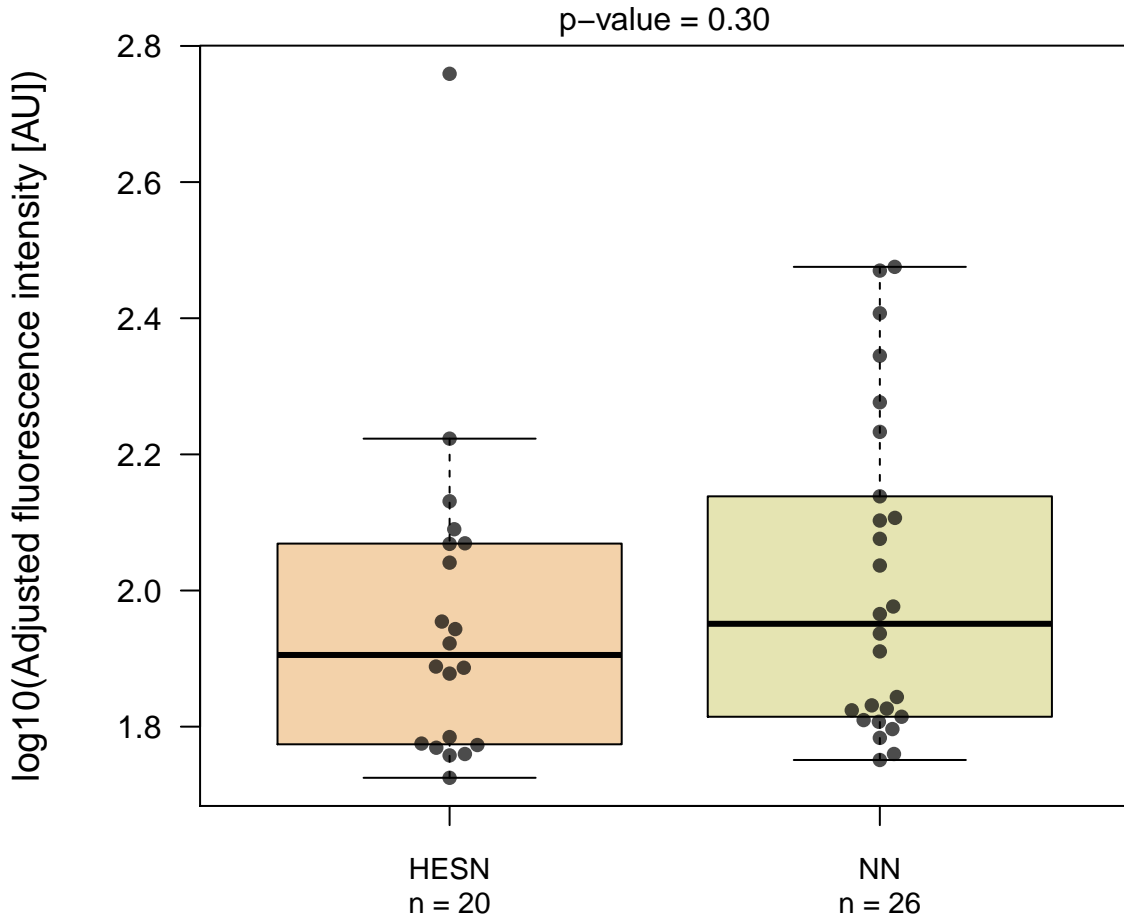

# SERPINB1

serpin family B member 1

Antibody: HPA018871

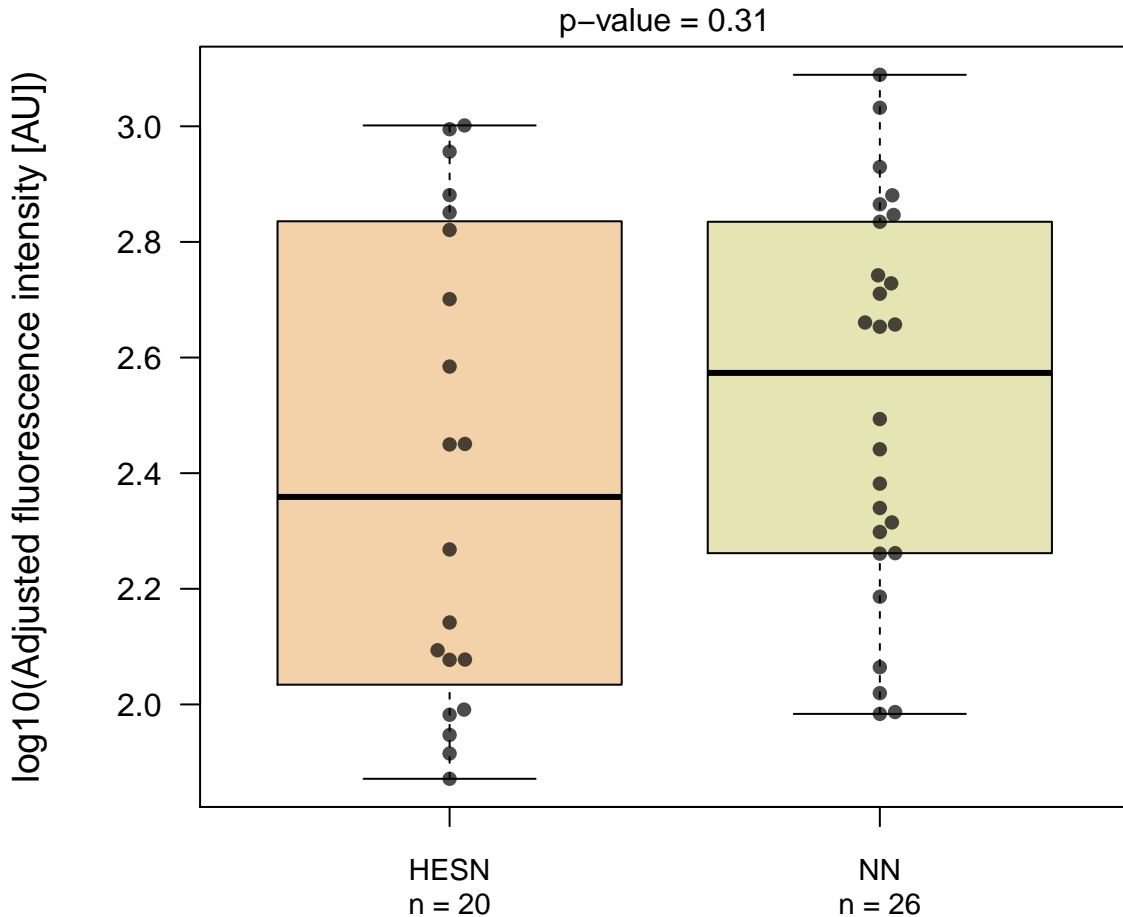

# C4BPA

complement component 4 binding protein alpha

Antibody: HPA001845

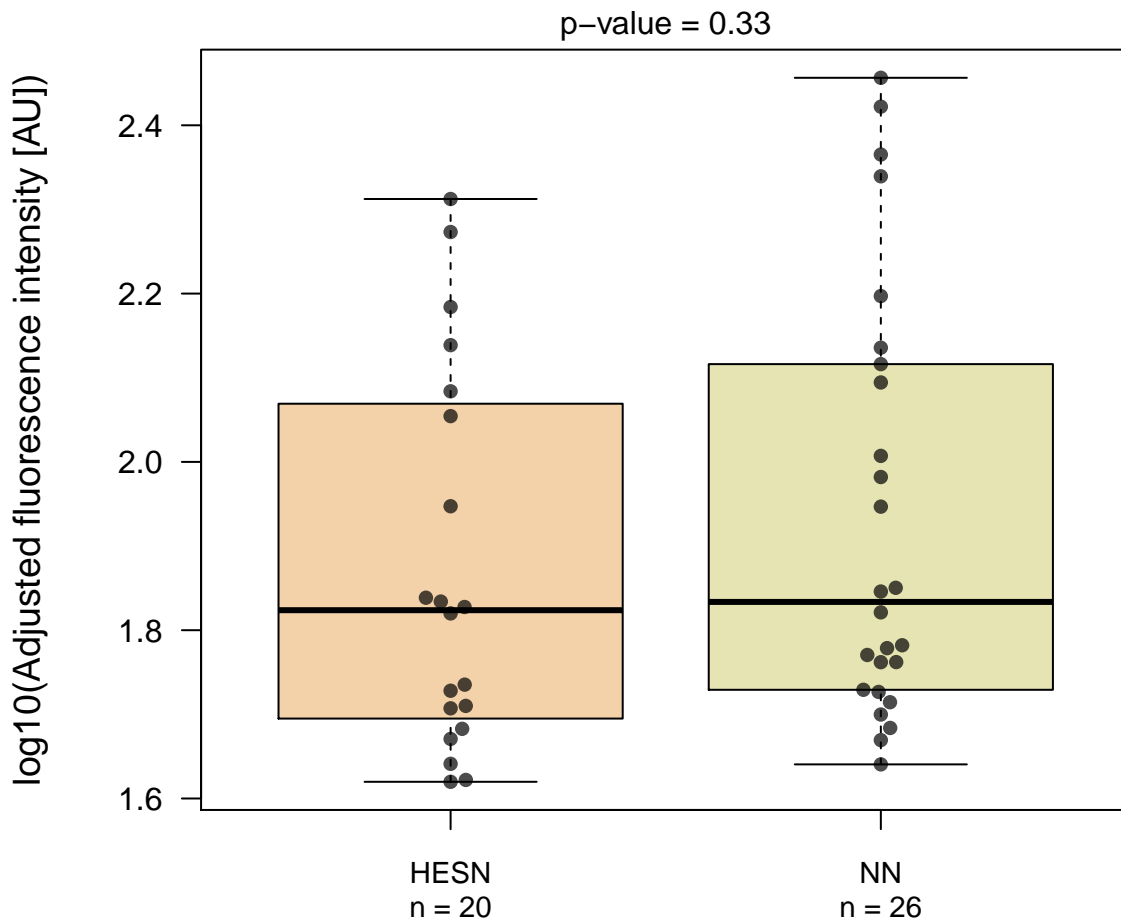

# NCF2

neutrophil cytosolic factor 2

Antibody: HPA002327

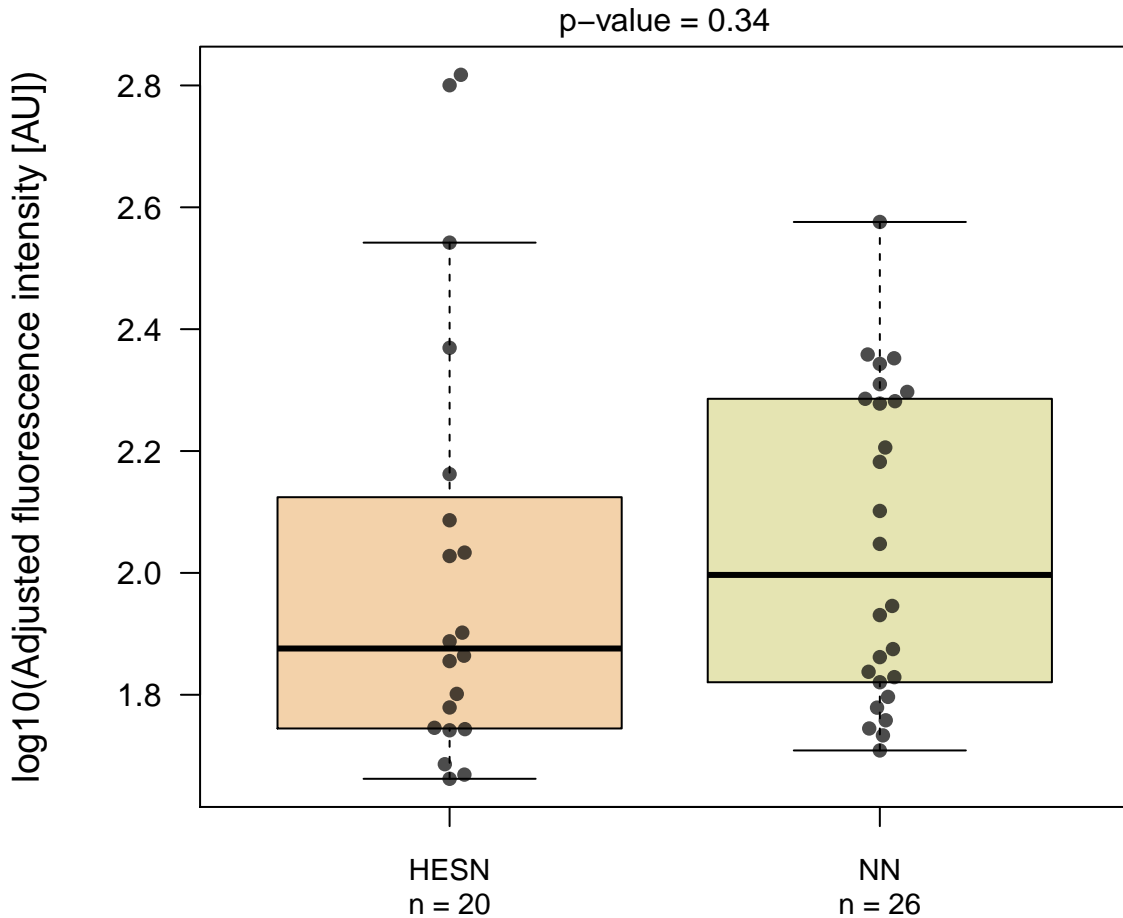



# MYH9

myosin heavy chain 9

Antibody: HPA001644

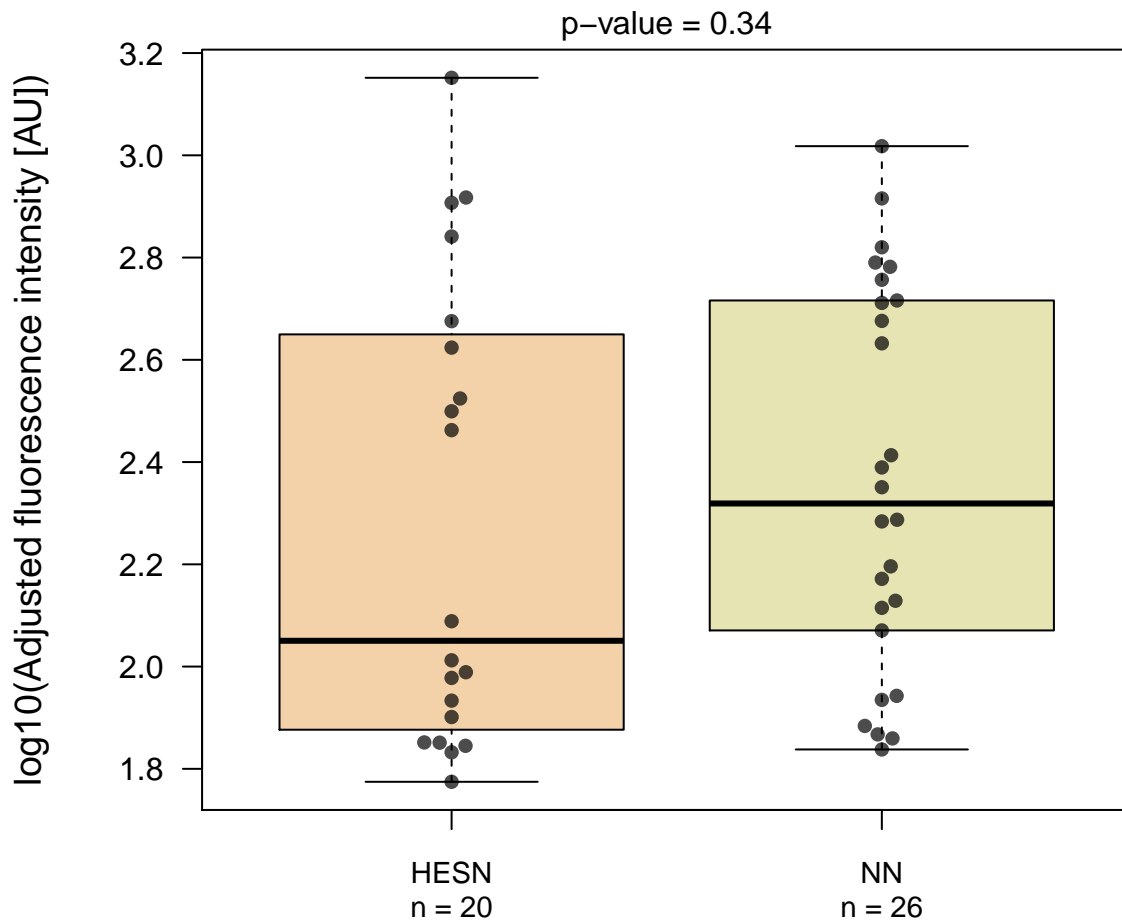

# TMPRSS11E

transmembrane serine protease 11E

Antibody: HPA051062

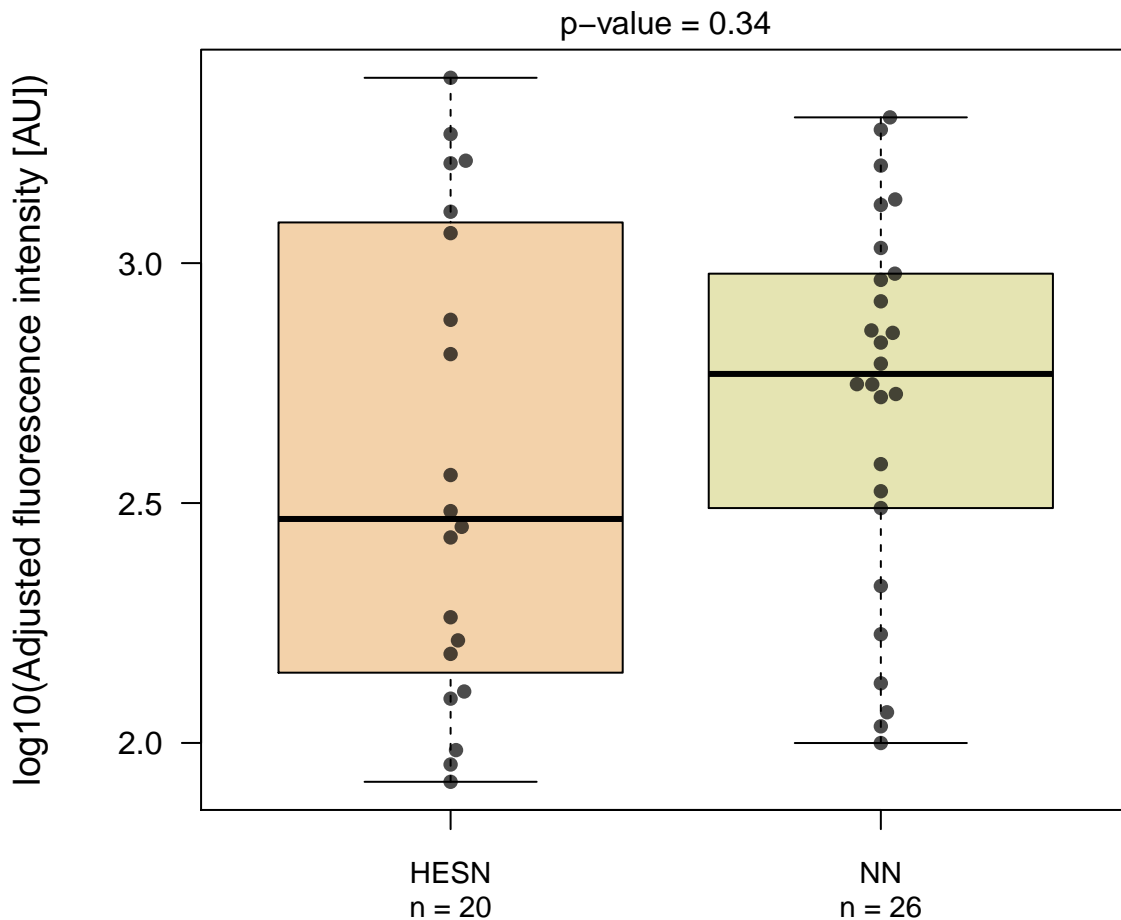

# F11R

F11 receptor

Antibody: HPA061700

p-value = 0.34

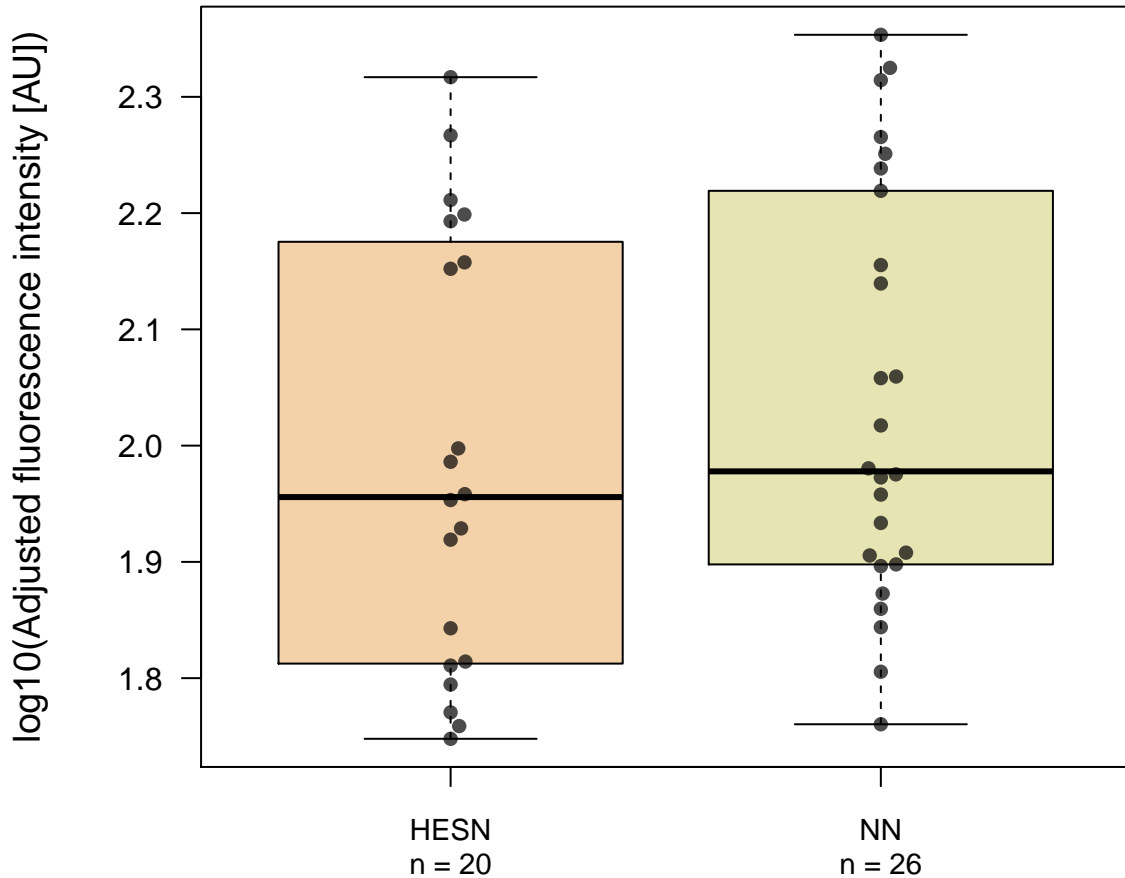

# S100P

S100 calcium binding protein P

Antibody: HPA019502

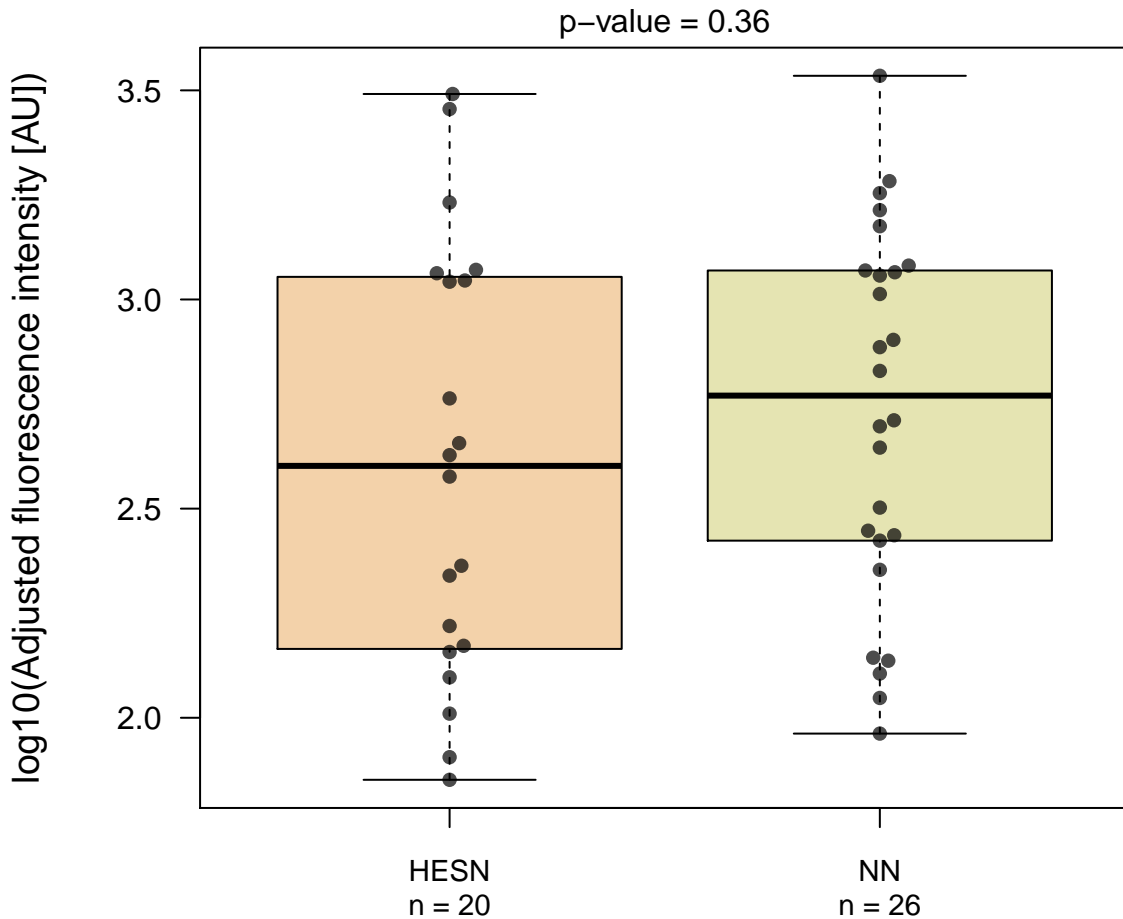

# PKP1

plakophilin 1

Antibody: HPA027221

p-value = 0.36

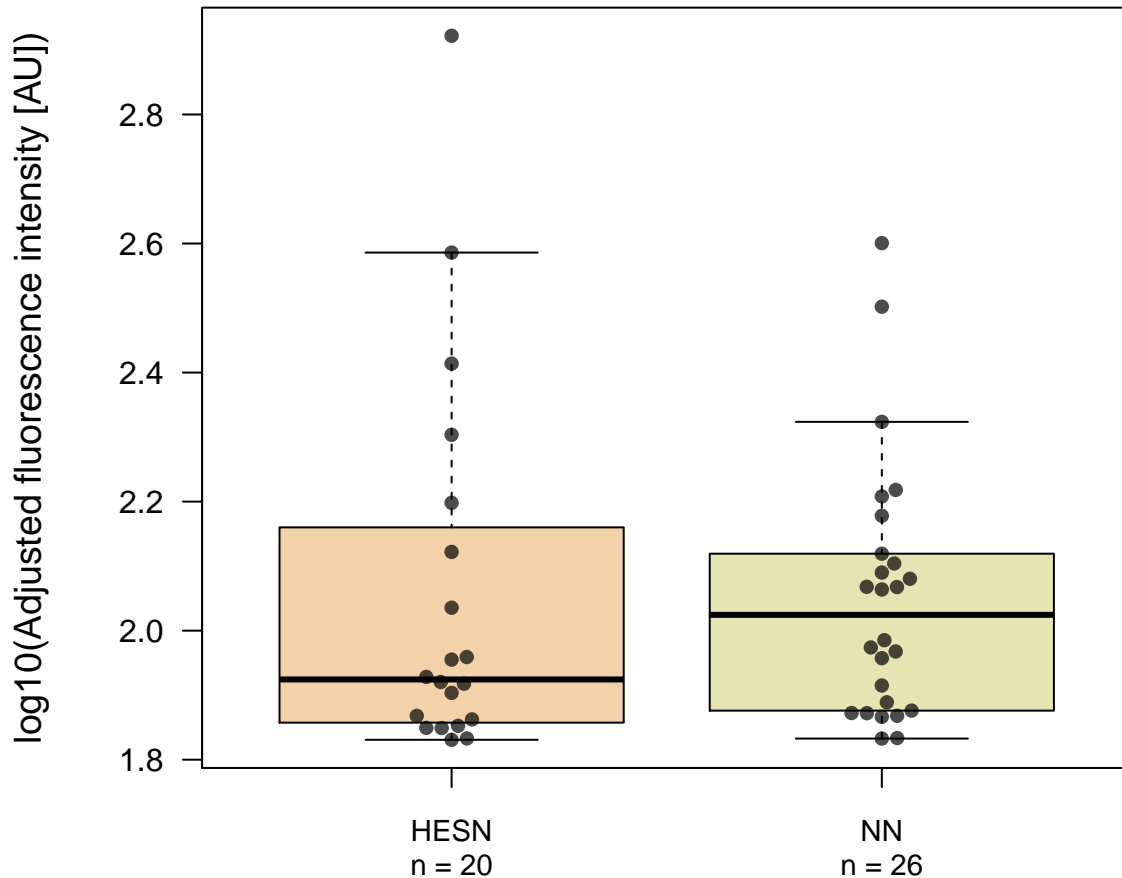

# ITIH2

inter-alpha-trypsin inhibitor heavy chain 2

Antibody: HPA059150

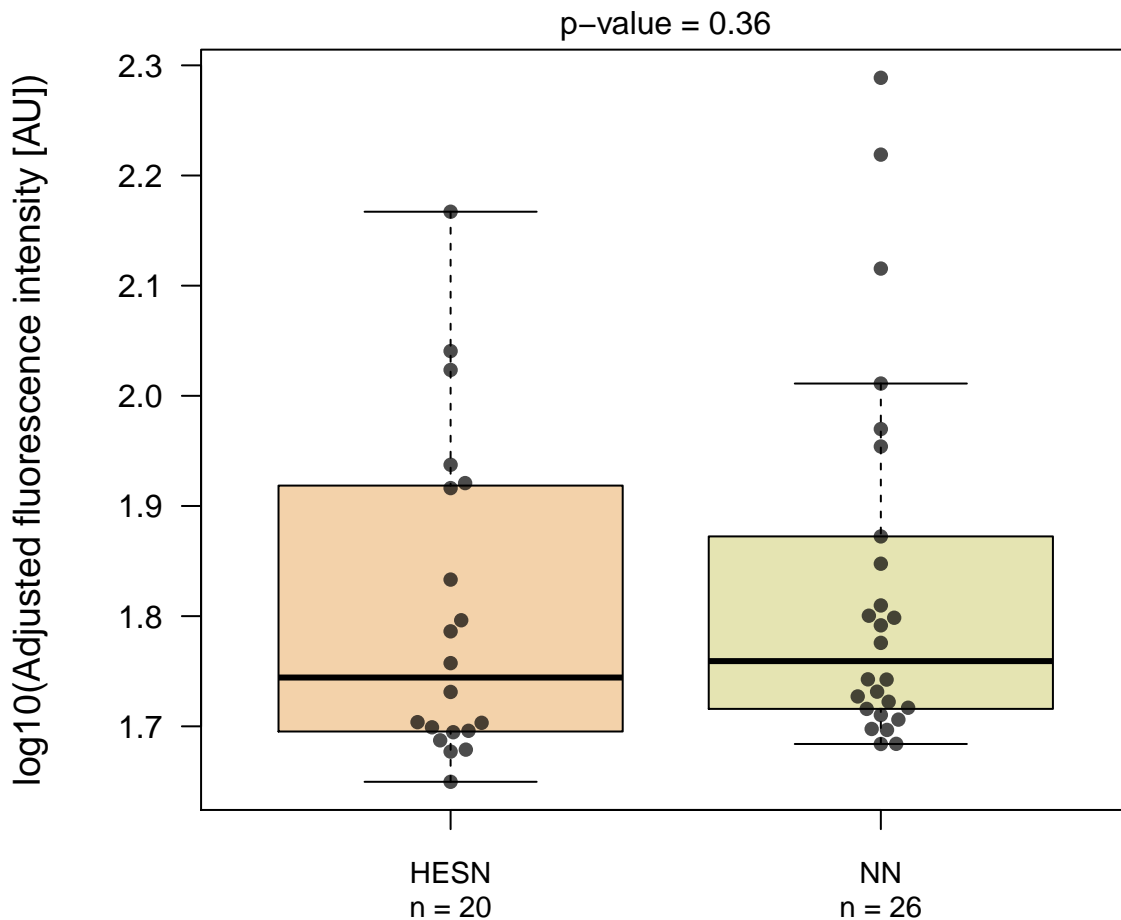

# ANXA1

annexin A1

Antibody: HPA011918

p-value = 0.37

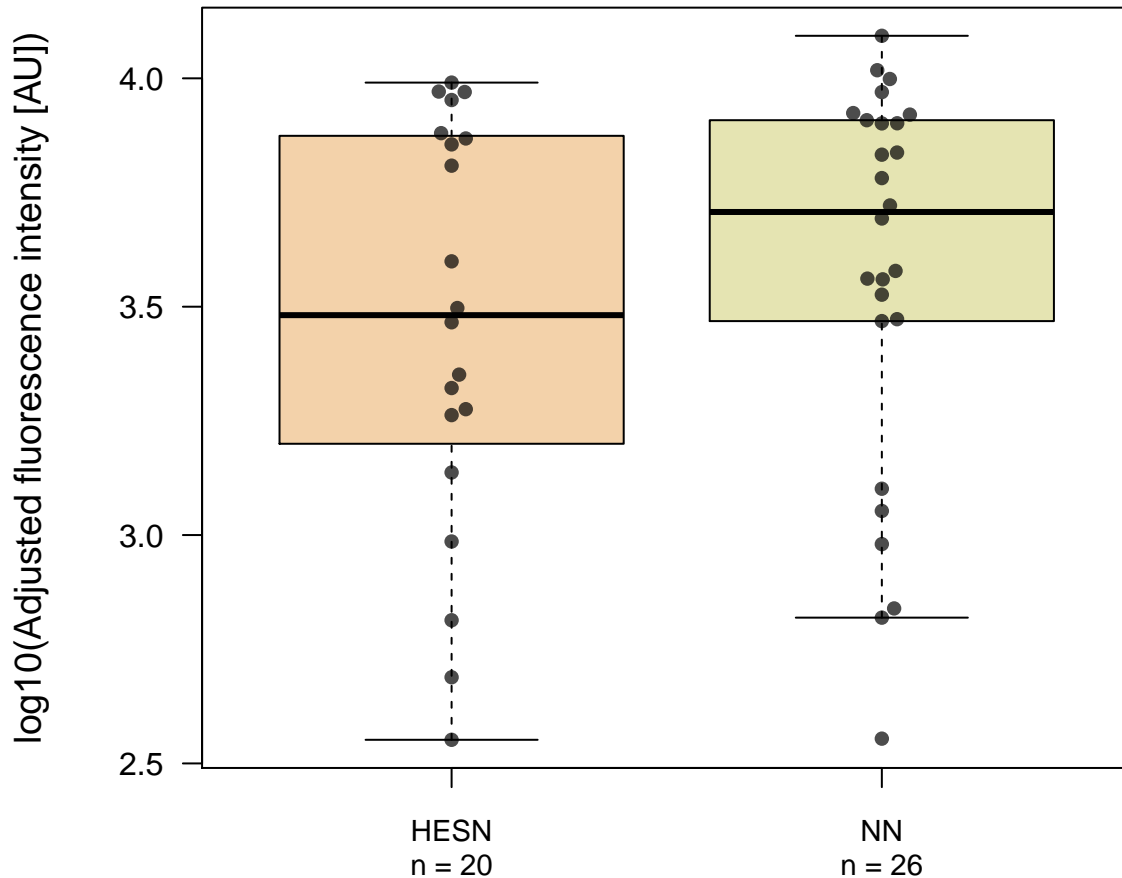

# RPTN

repetin

Antibody: HPA030485

p-value = 0.39

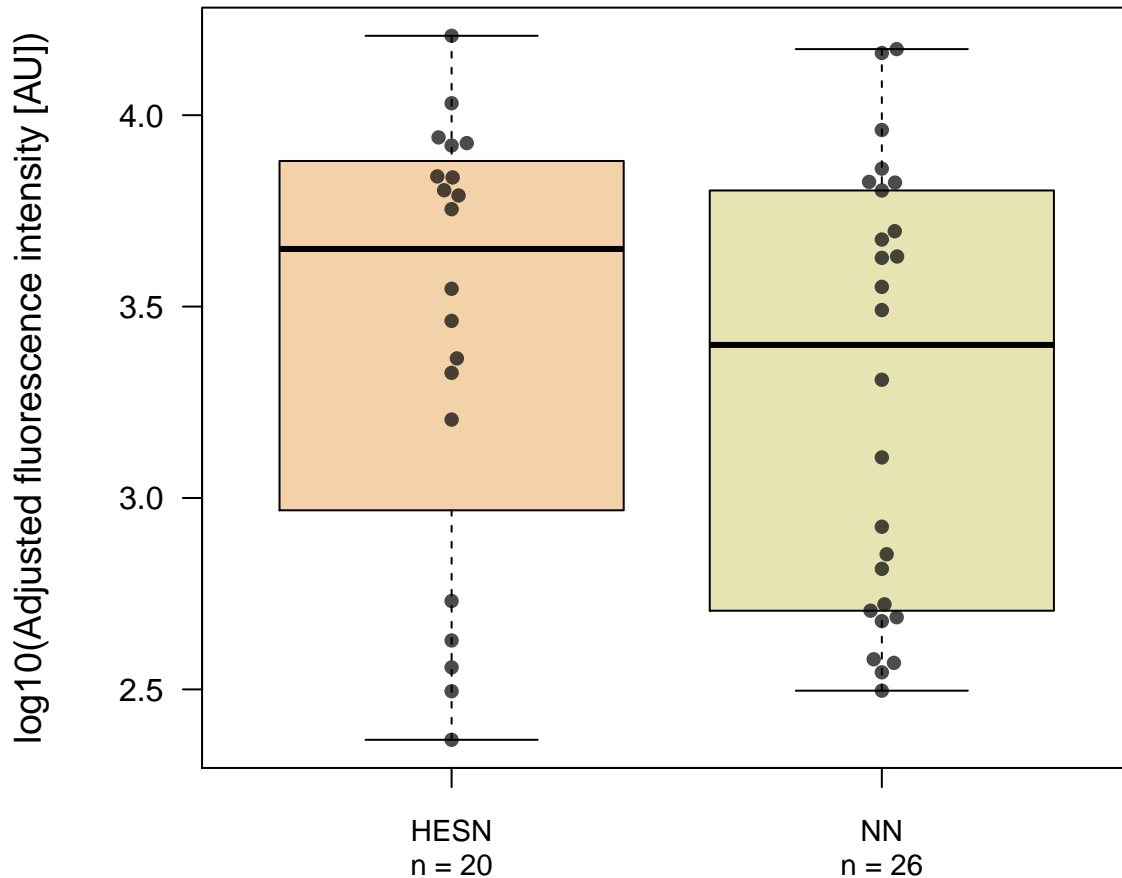



# LYZ

lysozyme

Antibody: HPA048284

p-value = 0.39

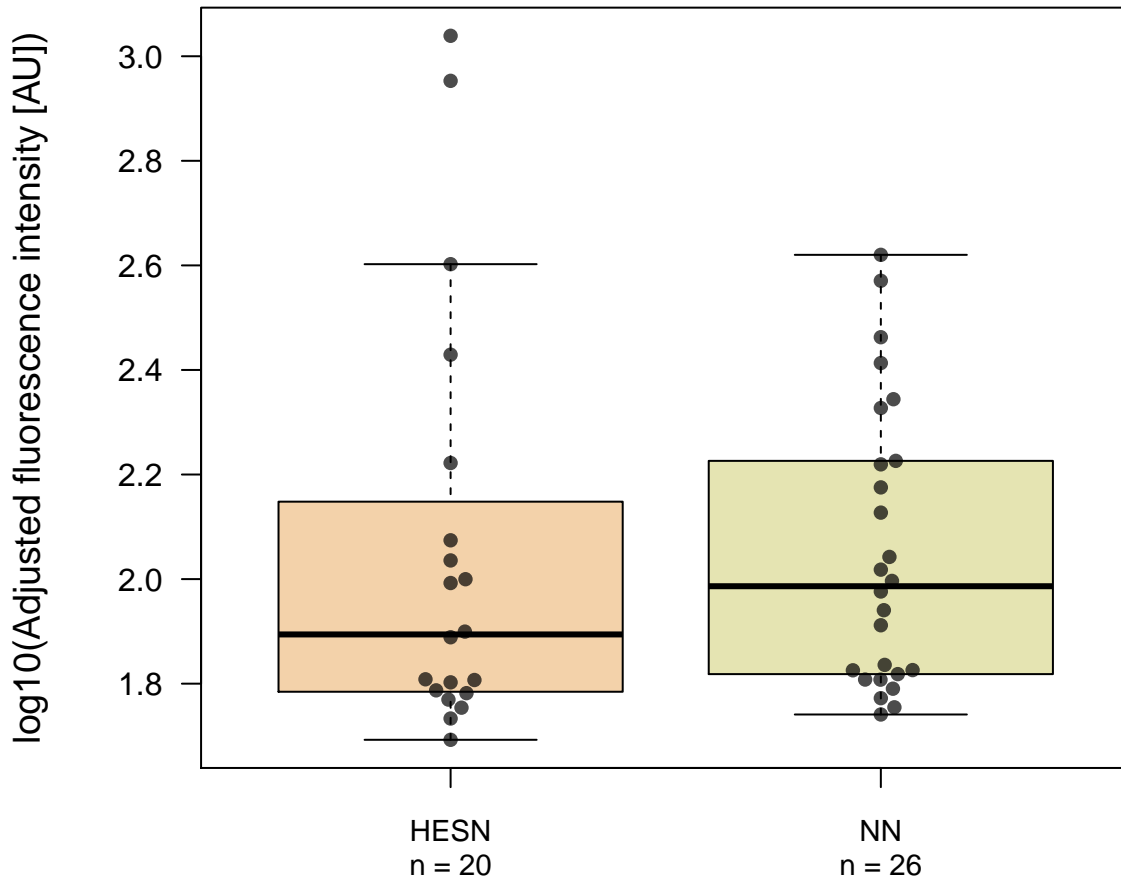

# TACSTD2

tumor associated calcium signal transducer 2

Antibody: HPA055067

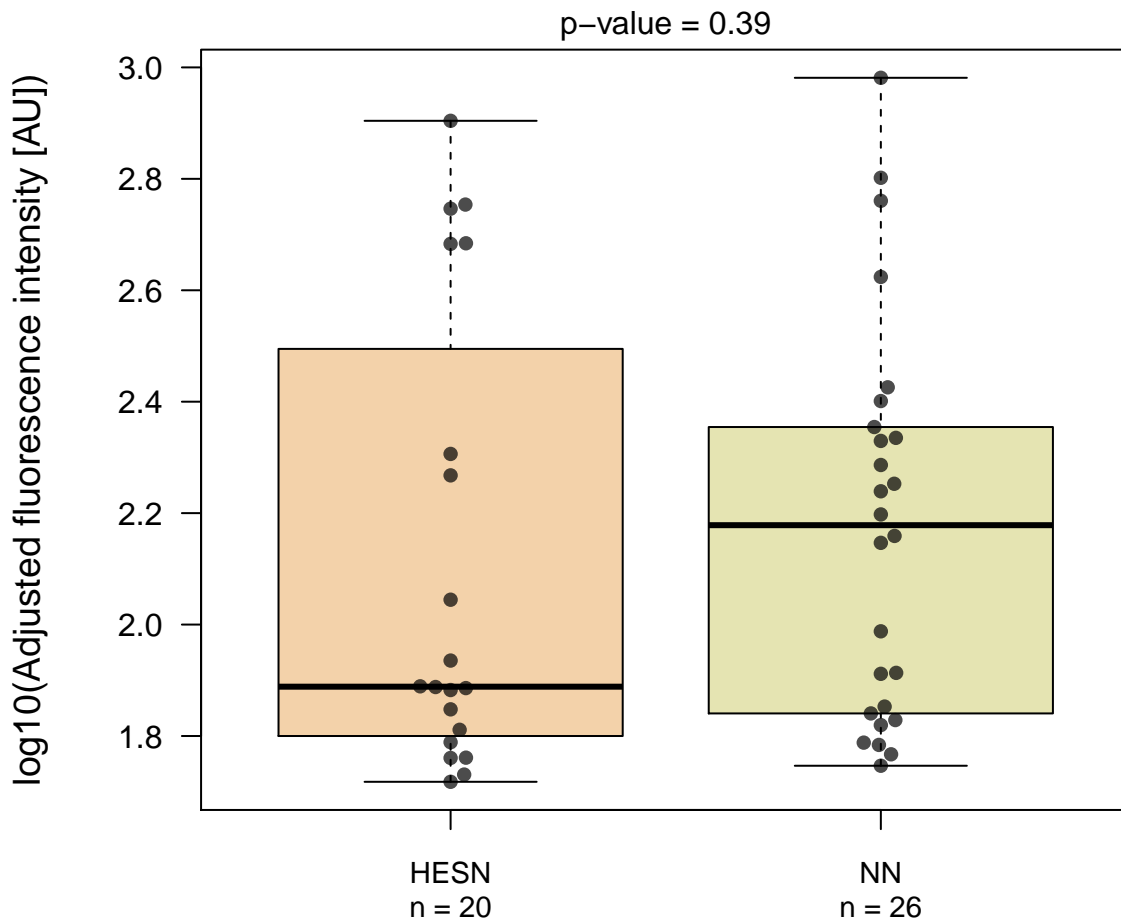

# IL36G

interleukin 36 gamma

Antibody: HPA055042

p-value = 0.44

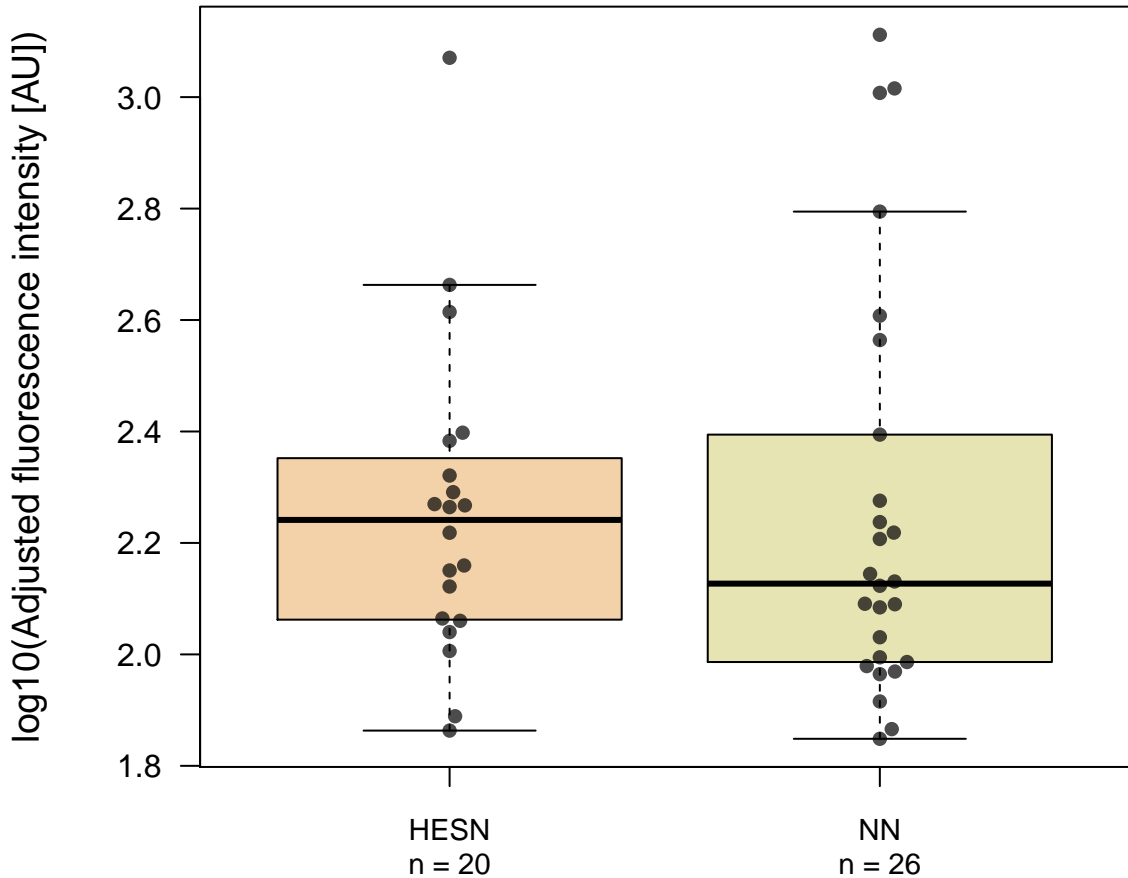

# SERPINA1

serpin family A member 1

Antibody: HPA001291

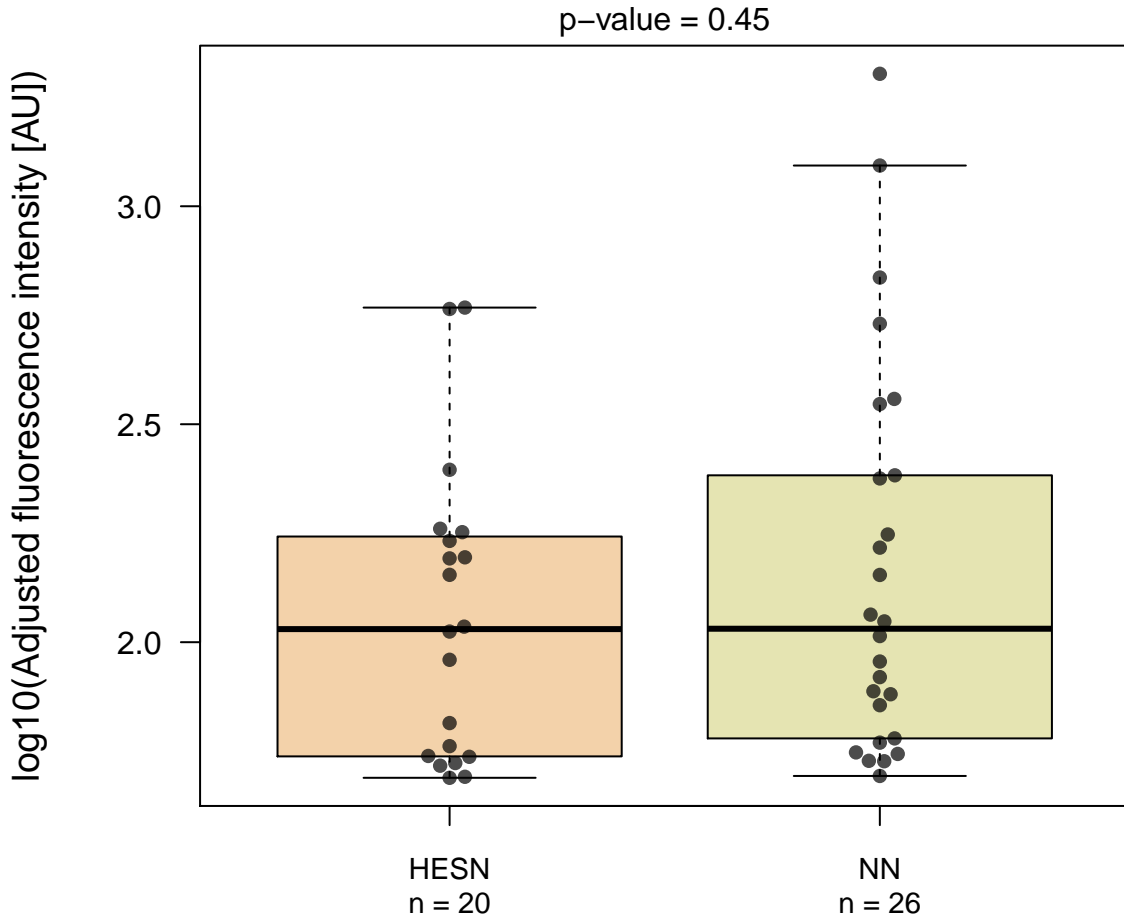

# SERPINB7

serpin family B member 7

Antibody: HPA024200

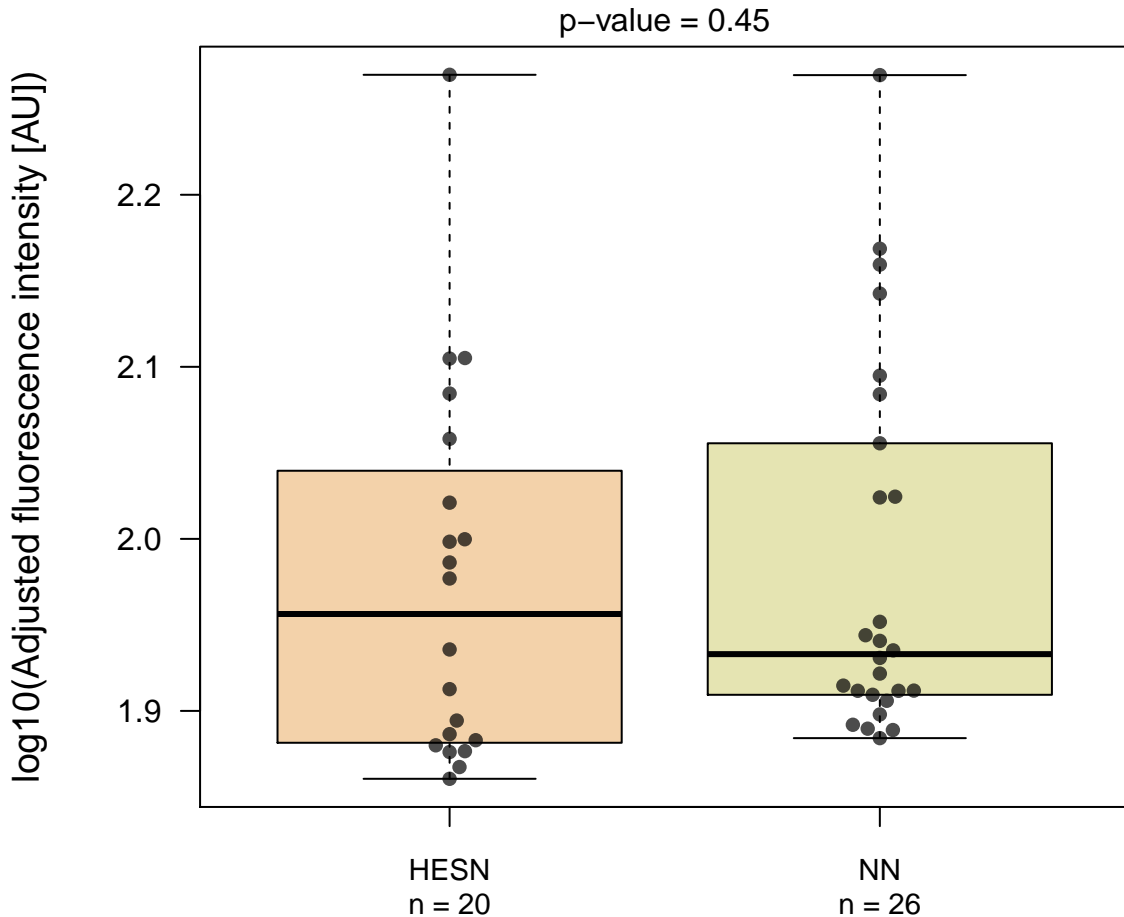

# LDHA

lactate dehydrogenase A

Antibody: HPA075026

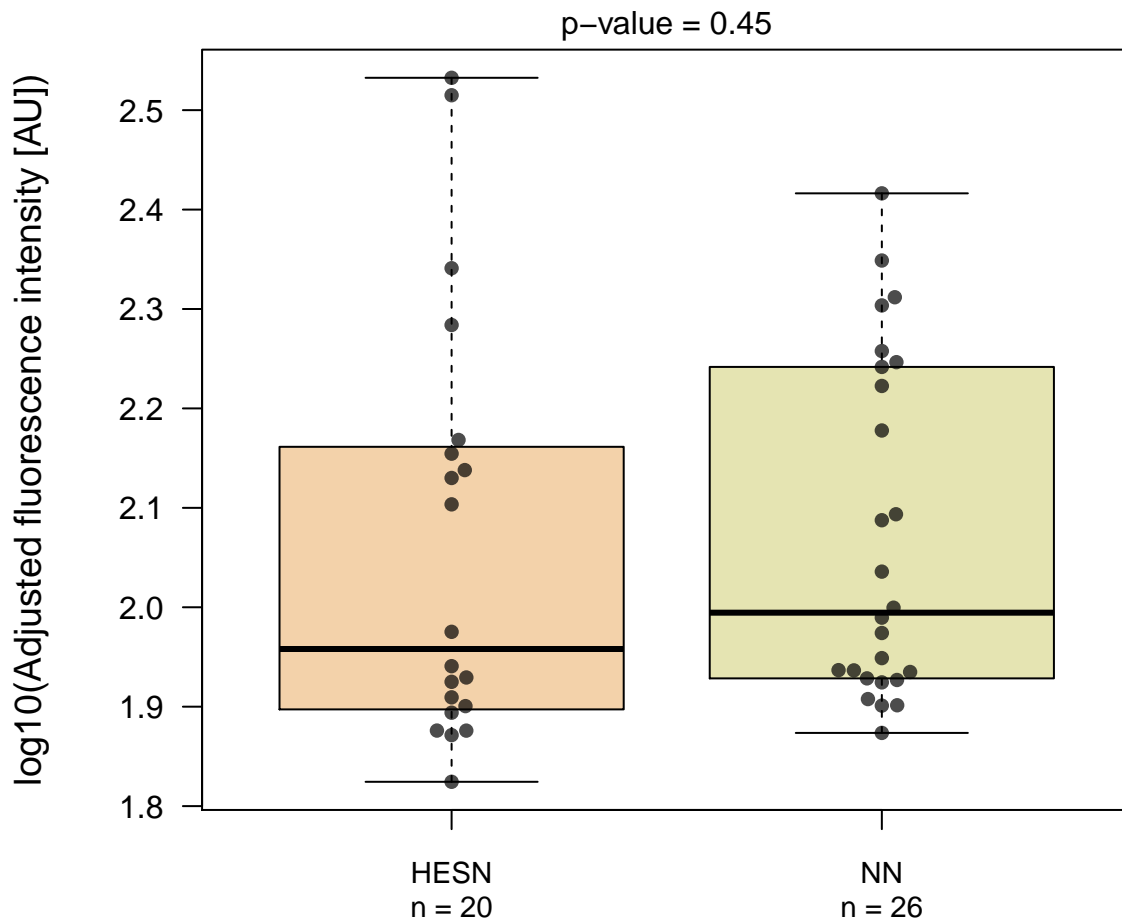

# PI3

peptidase inhibitor 3

Antibody: HPA017737

p-value = 0.46

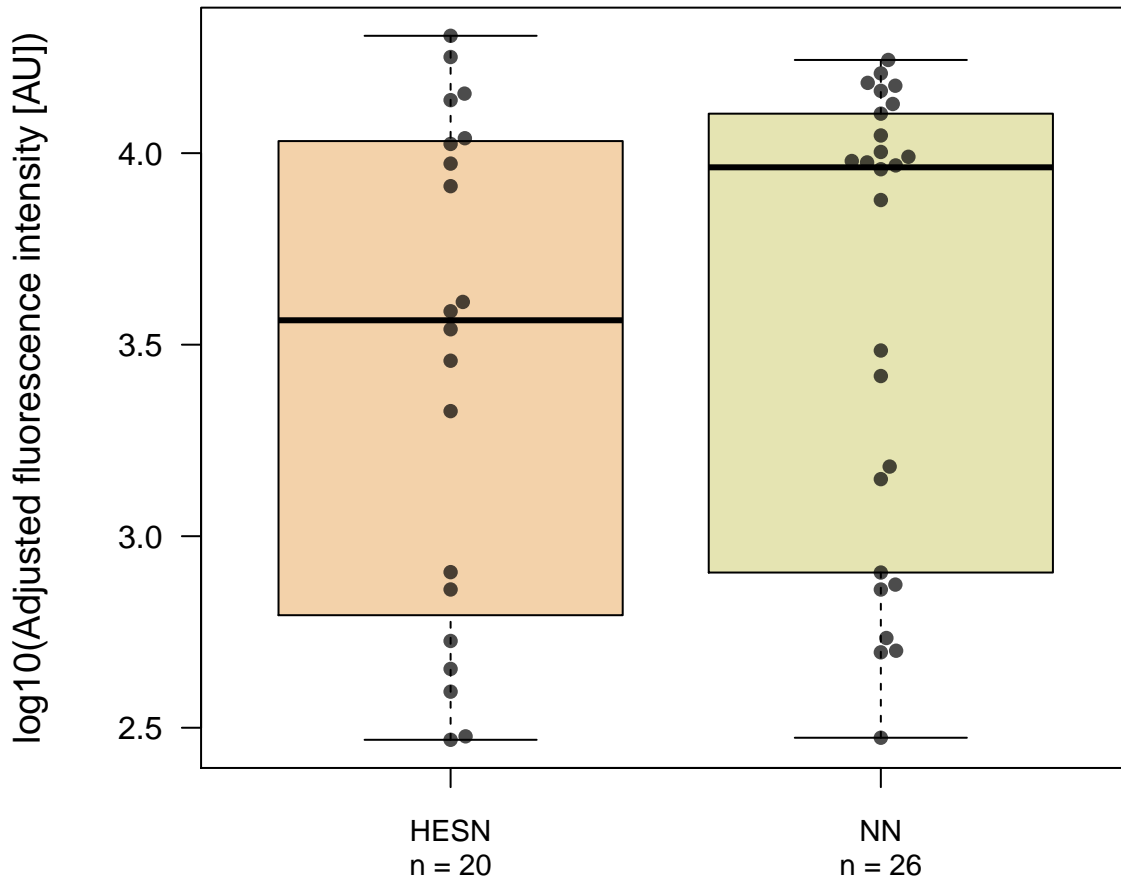

# SERPINA6

serpin family A member 6

Antibody: HPA017864

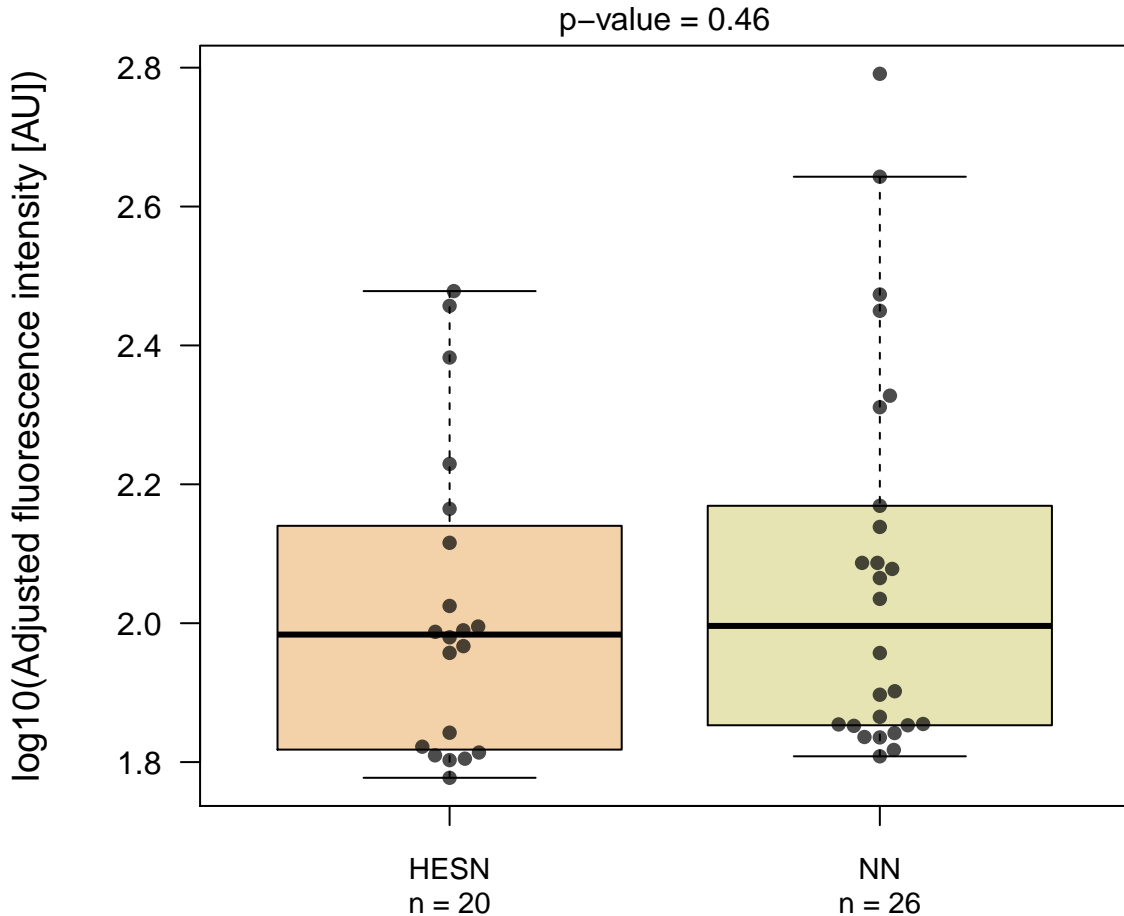



# MMP8

matrix metalloproteinase 8

Antibody: HPA022935

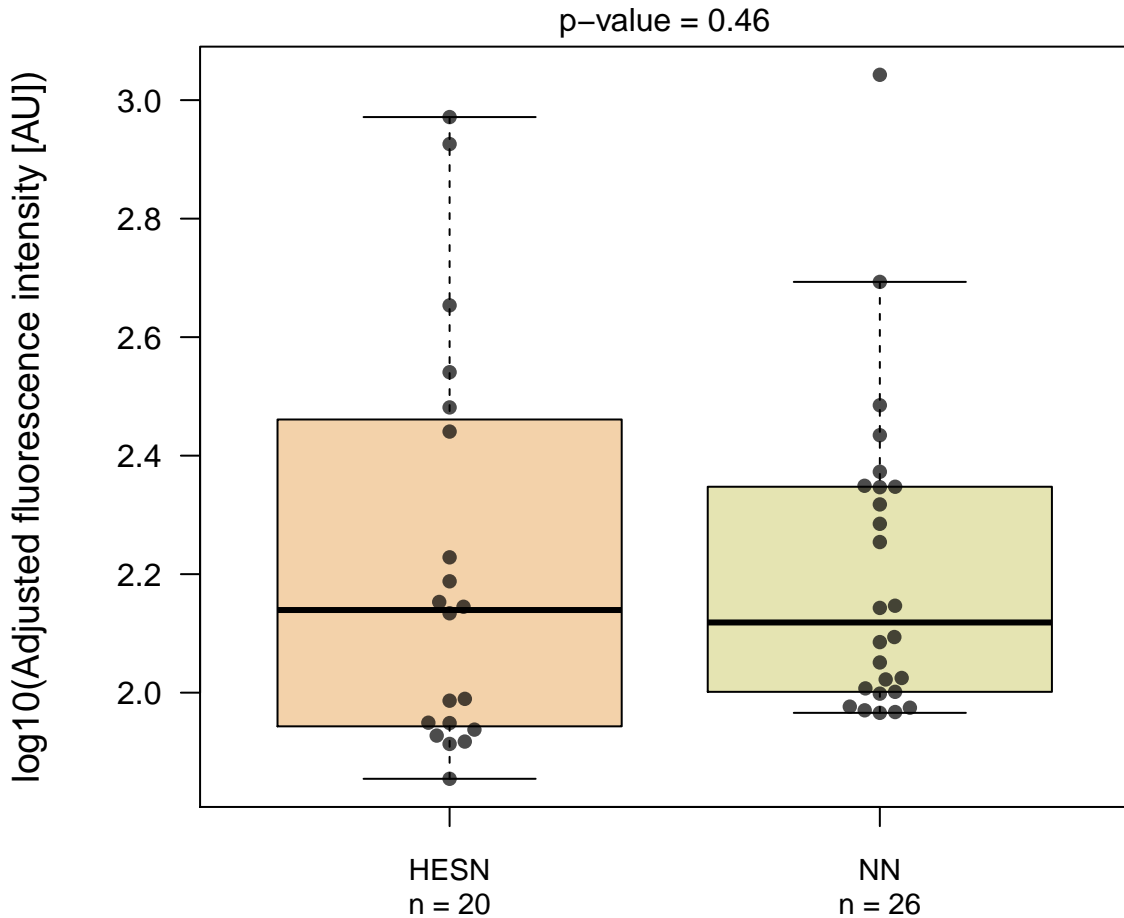

# S100A6

S100 calcium binding protein A6

Antibody: HPA008060

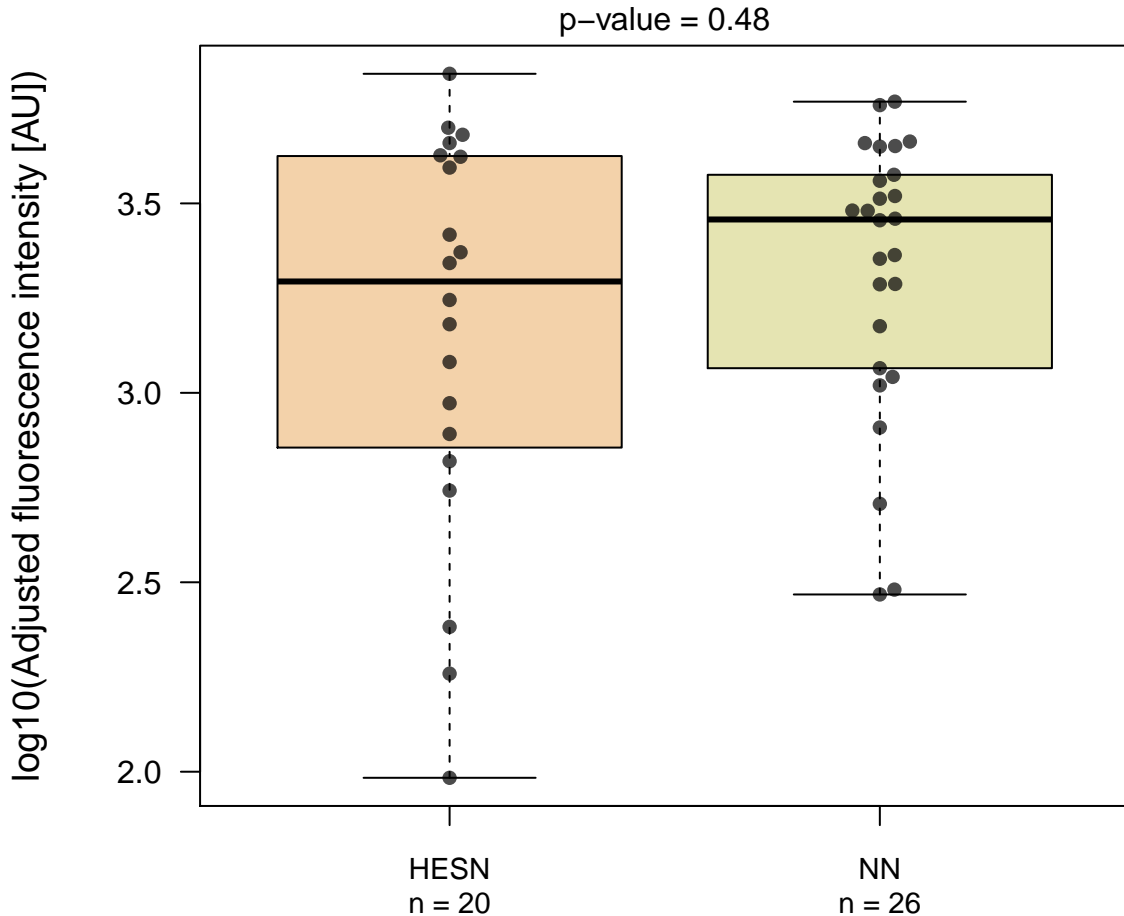

# COL1A2

collagen type I alpha 2 chain

Antibody: HPA068464

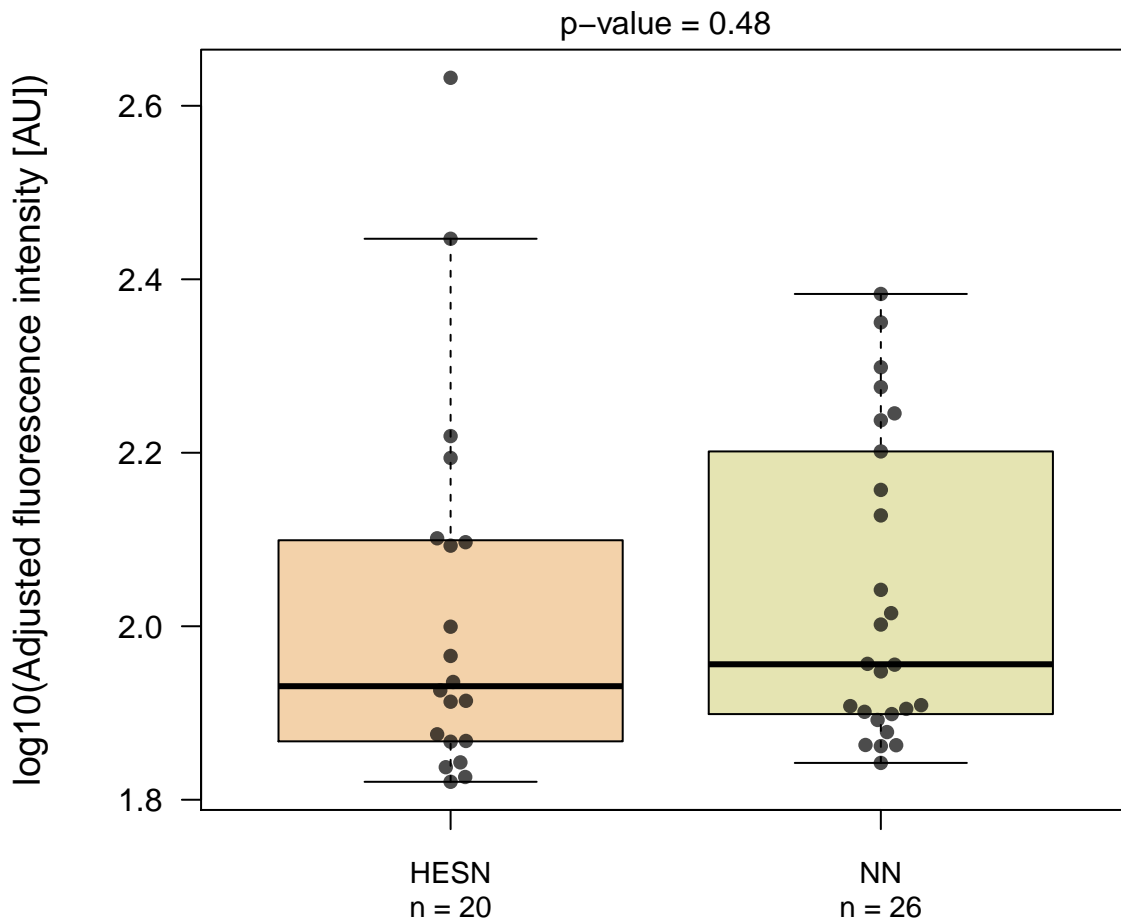

# CAPN14

calpain 14

Antibody: HPA067311

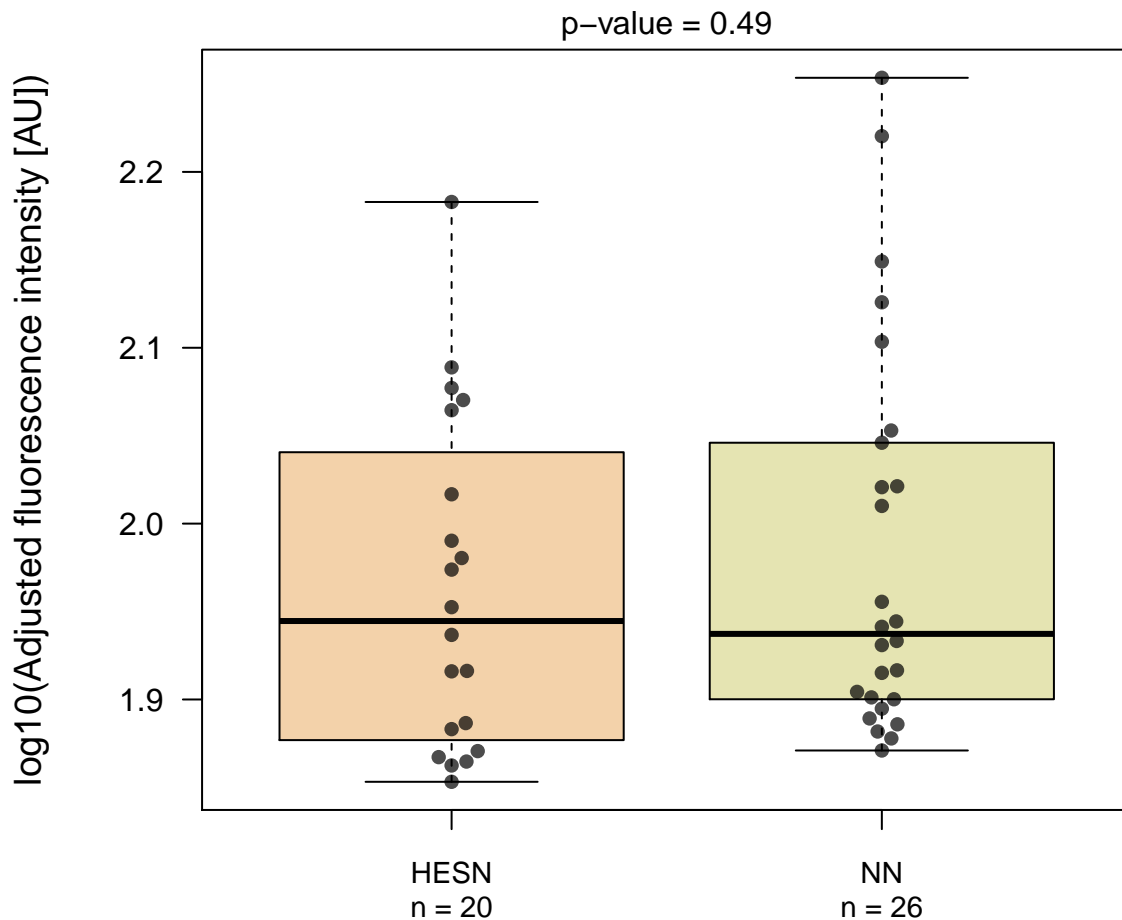

# MUC16

mucin 16, cell surface associated

Antibody: HPA065600

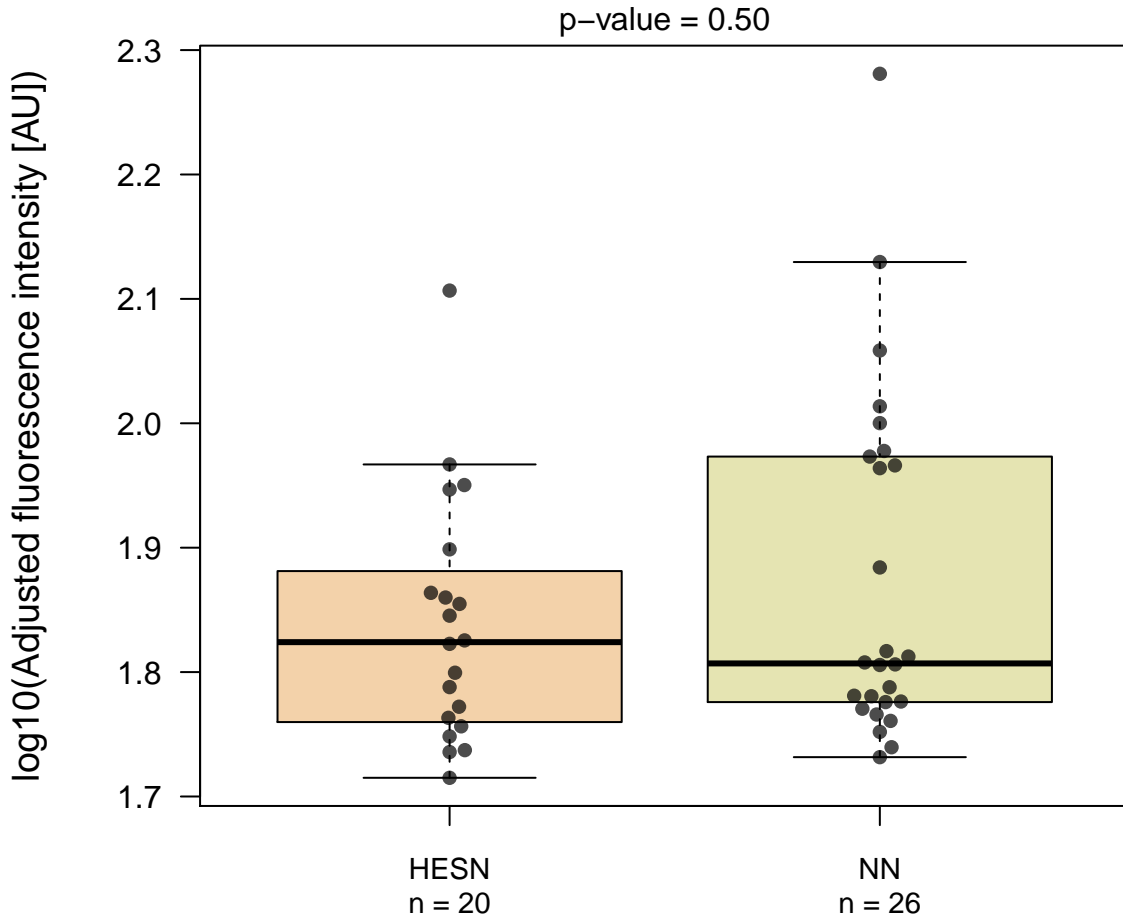

# CAPNS1

calpain small subunit 1

Antibody: HPA006872

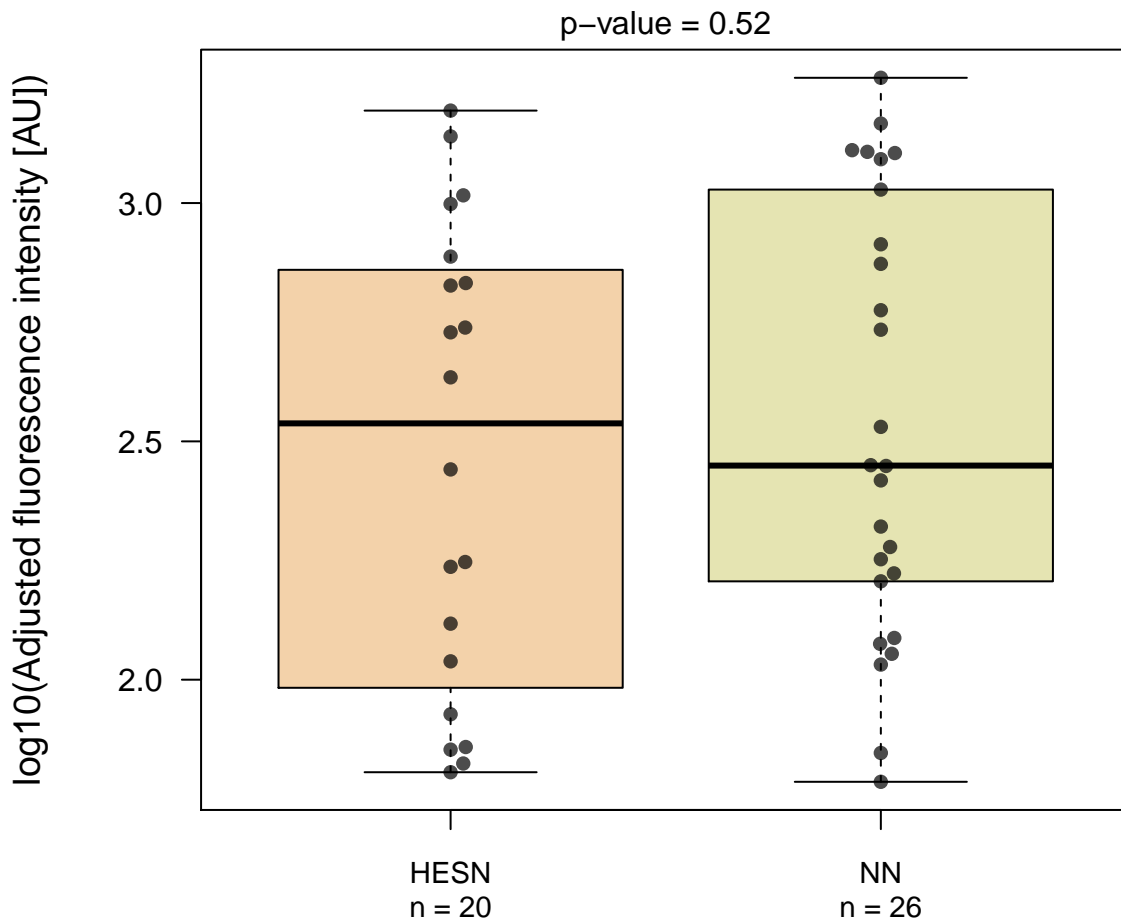

# SPINK5

serine peptidase inhibitor, Kazal type 5

Antibody: HPA011351

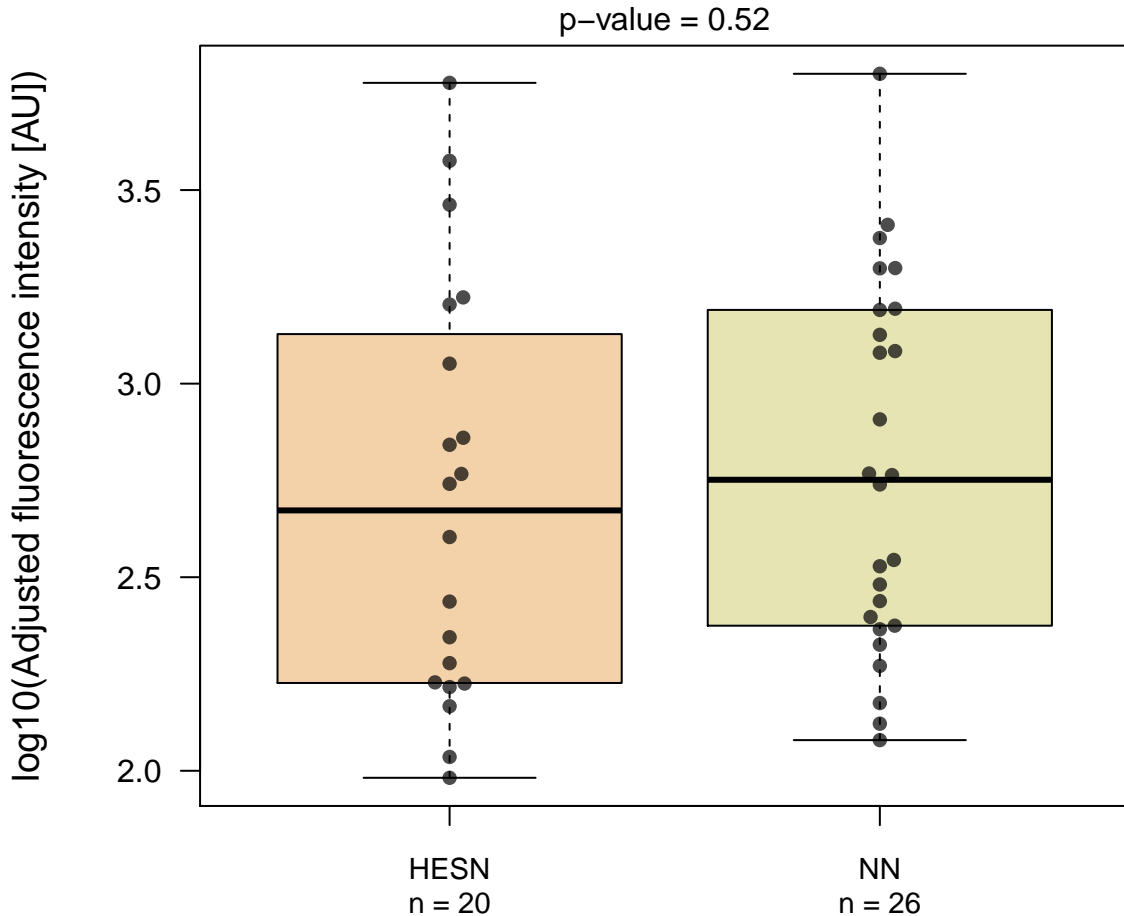

# CXCL10

C-X-C motif chemokine ligand 10

Antibody: HPA029858

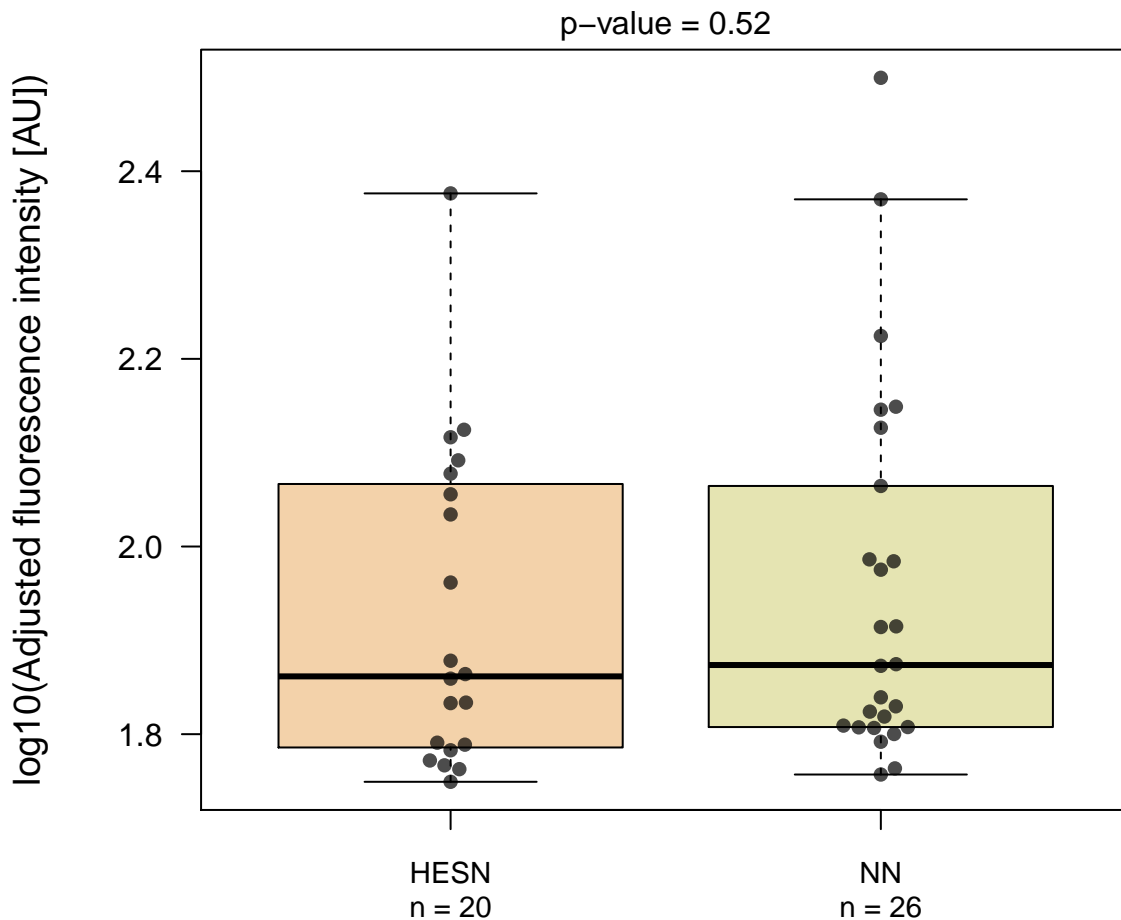



# SERPINB5

serpin family B member 5

Antibody: HPA019132

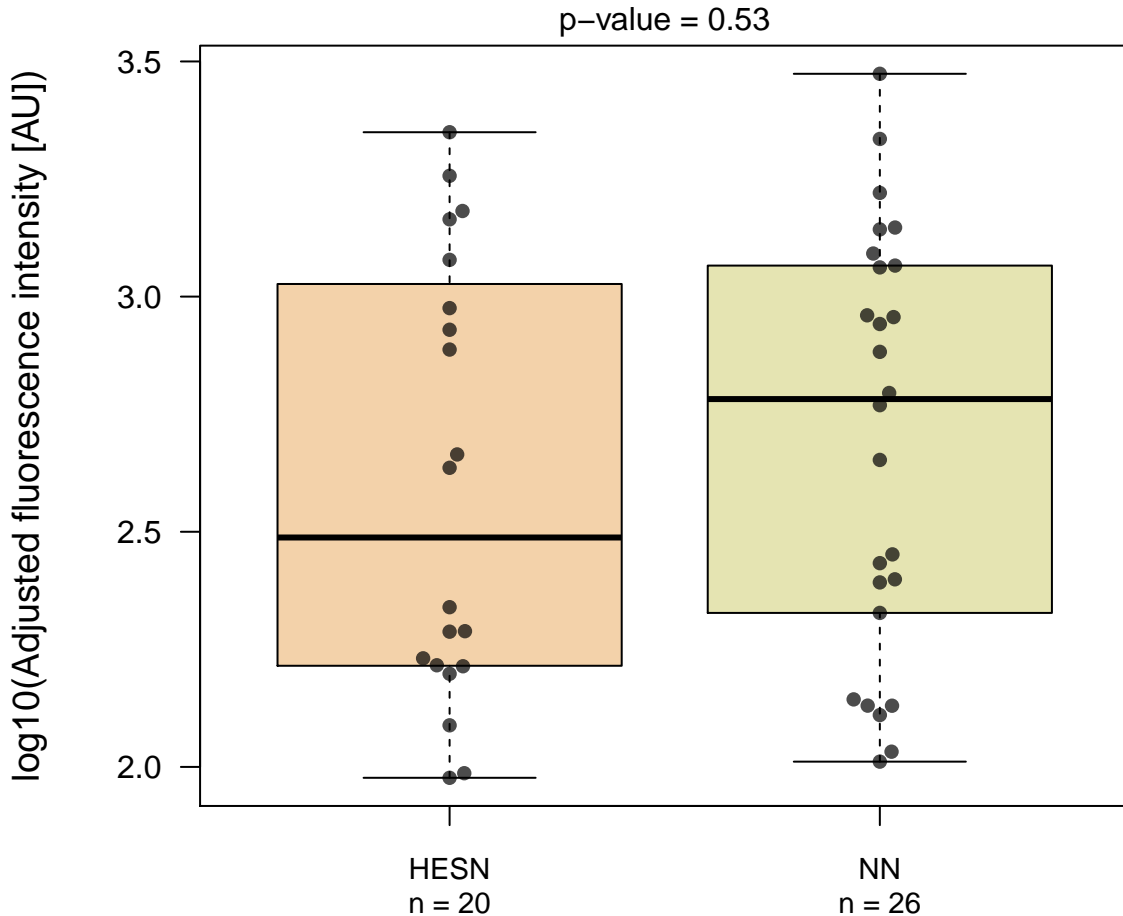

# LSP1

lymphocyte-specific protein 1

Antibody: HPA019693

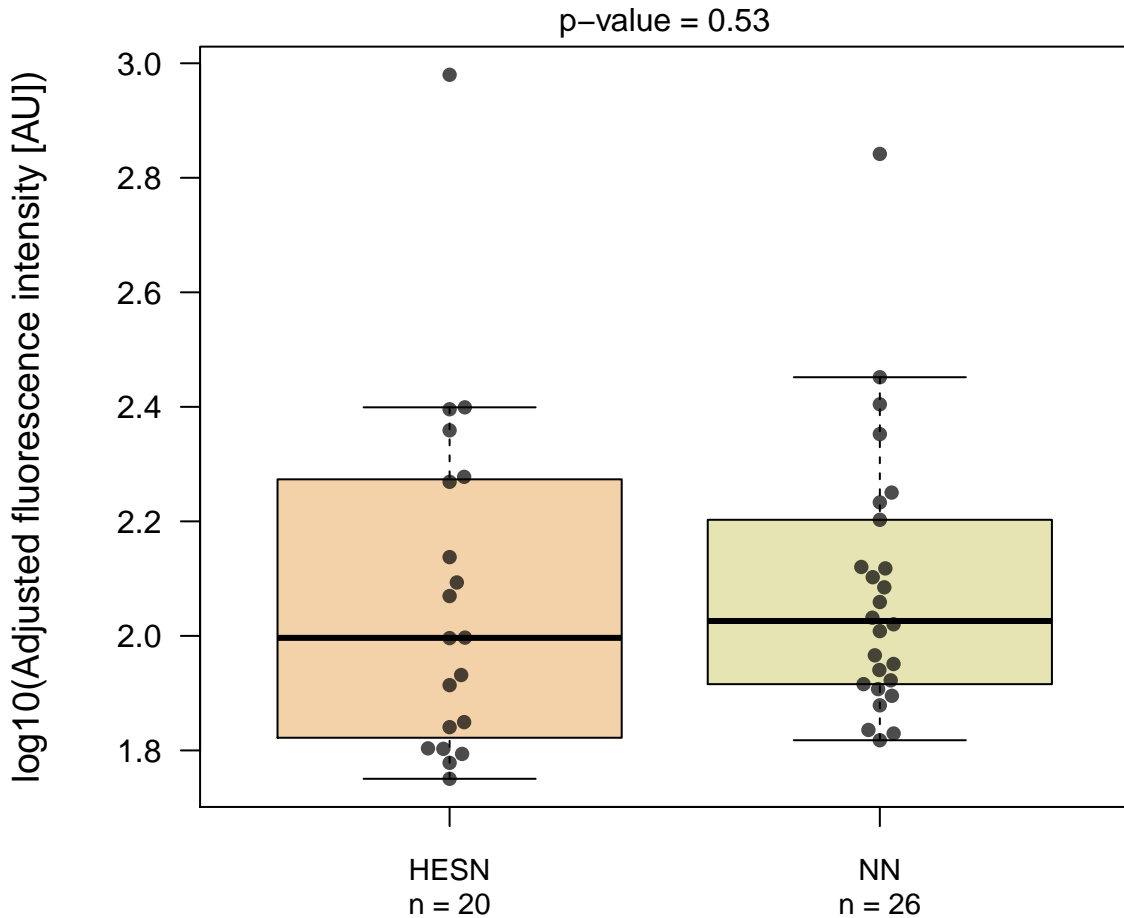

# ELANE

elastase, neutrophil expressed

Antibody: HPA066836

p-value = 0.55

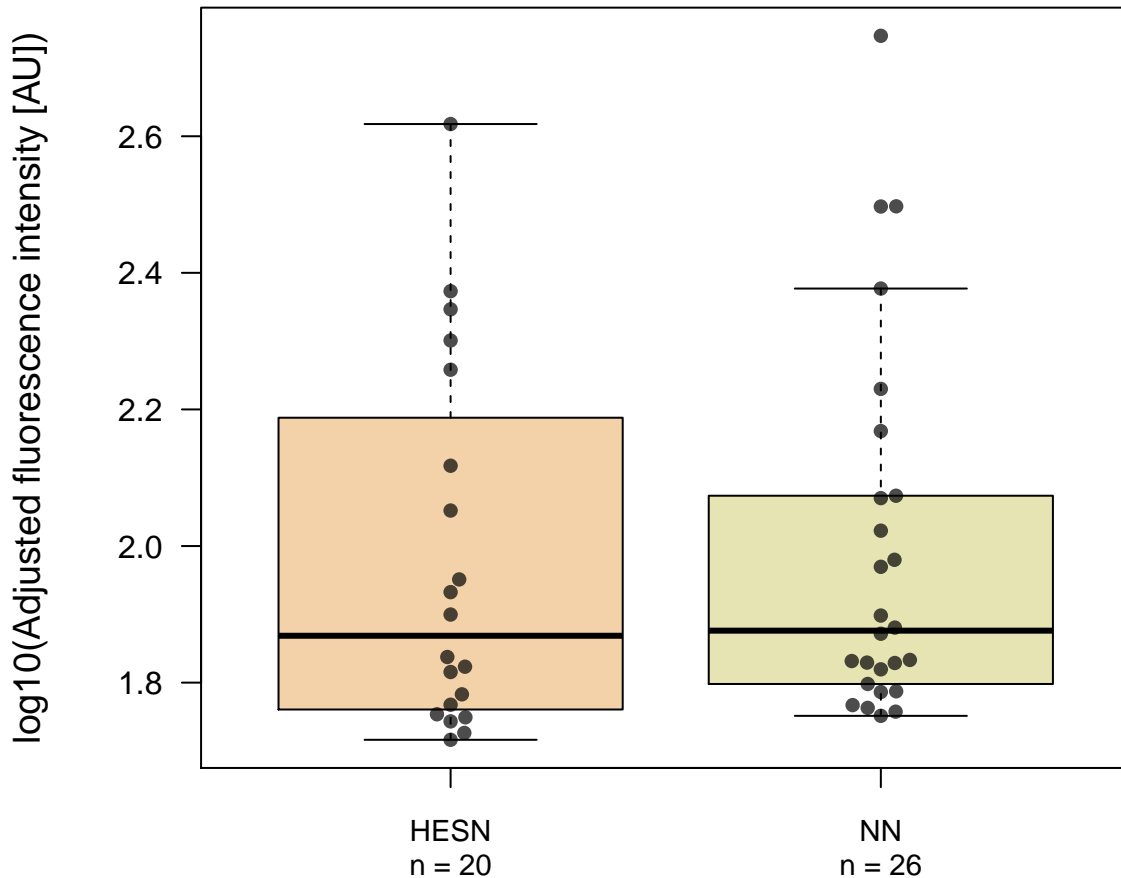

# GPX3

glutathione peroxidase 3

Antibody: HPA071520

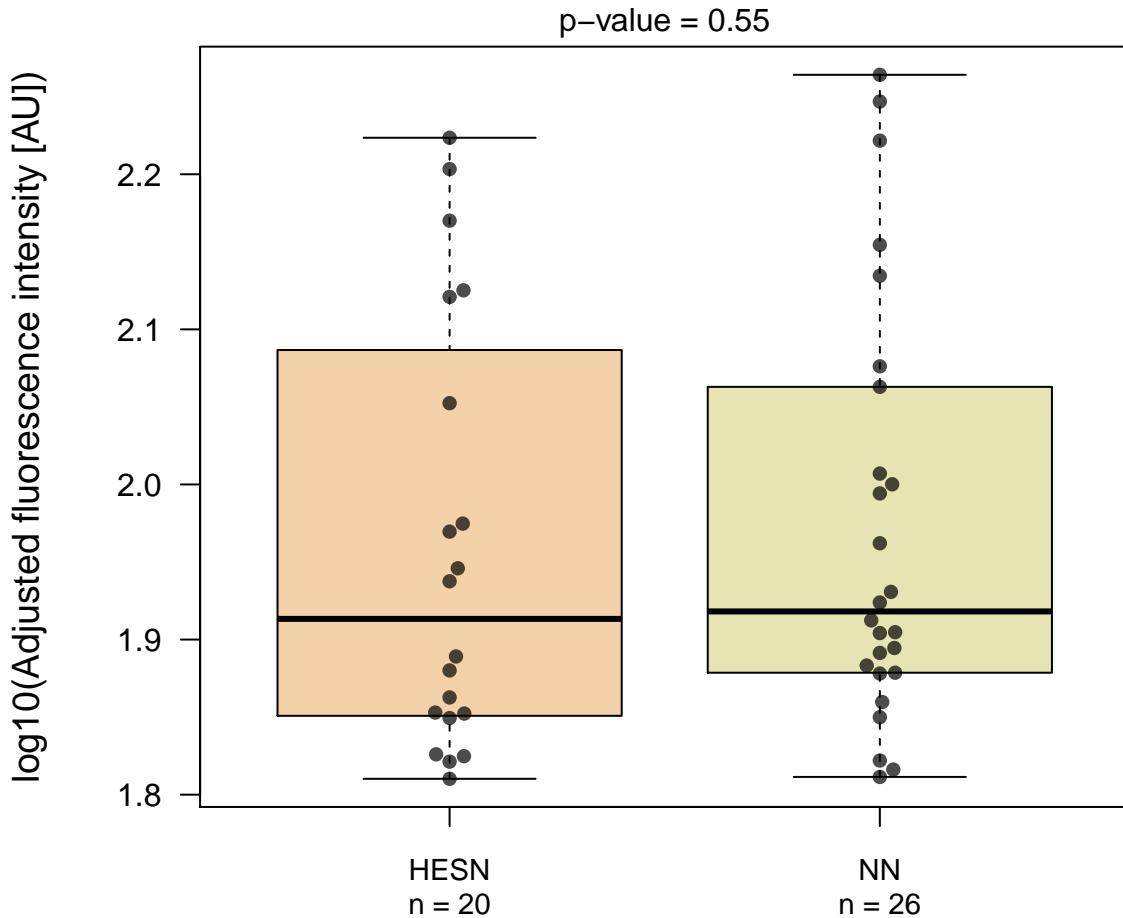

# SERPINB5

serpin family B member 5

Antibody: HPA019025

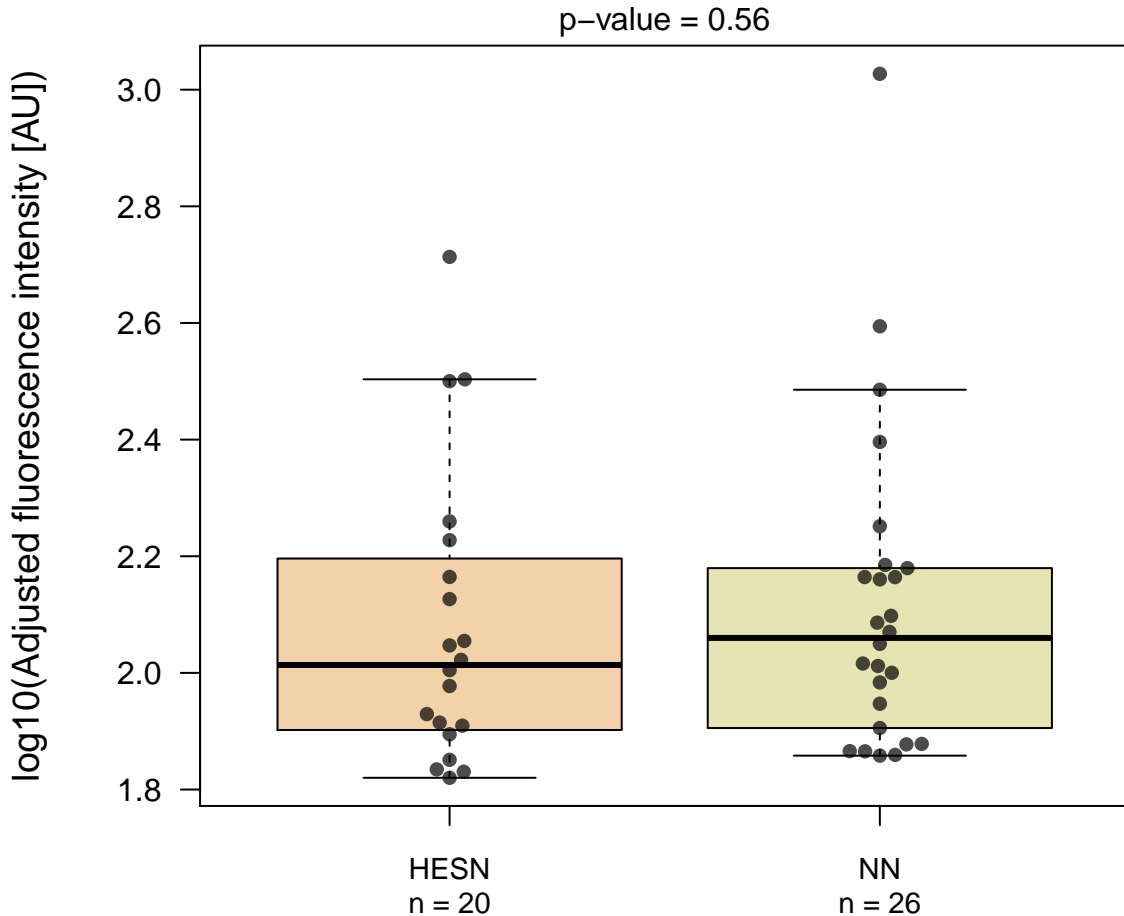

# SERPING1

serpin family G member 1

Antibody: HPA048738

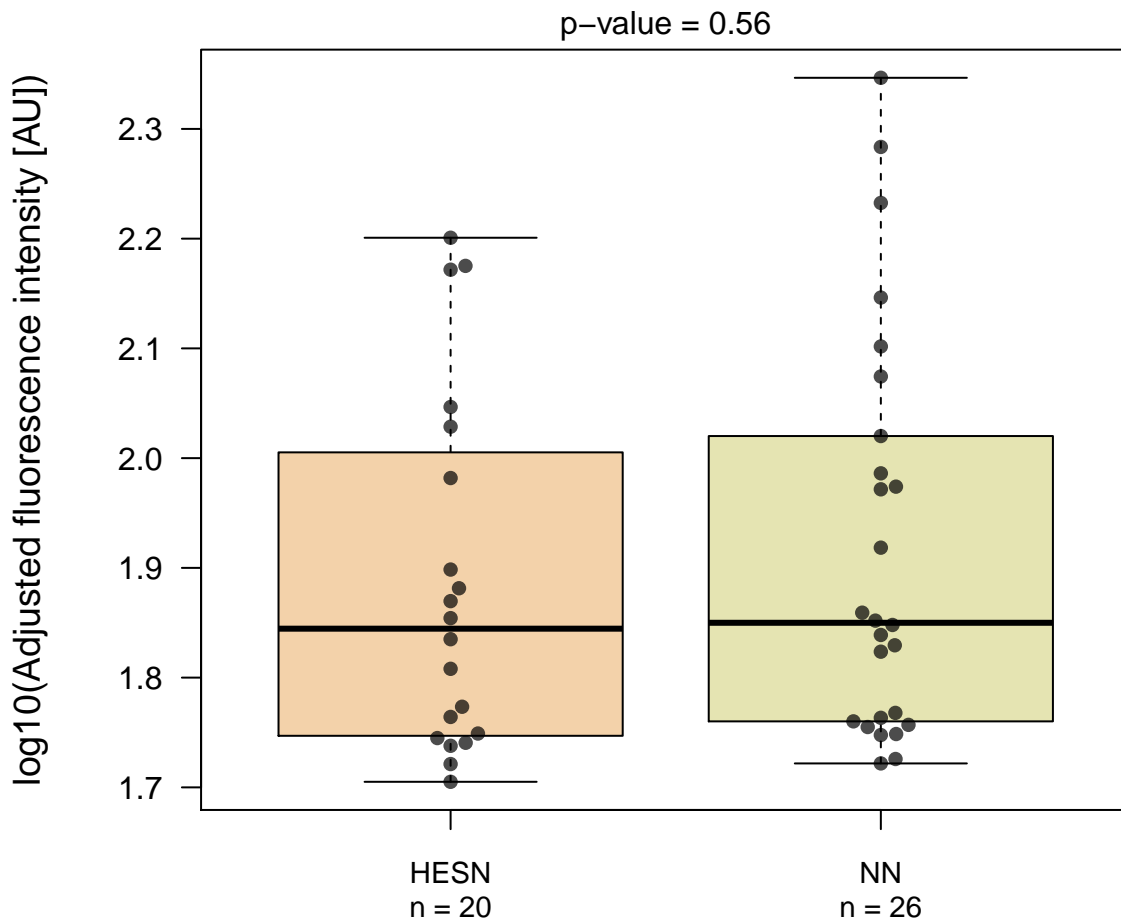

# IFNG

interferon gamma  
Antibody: HPA049525

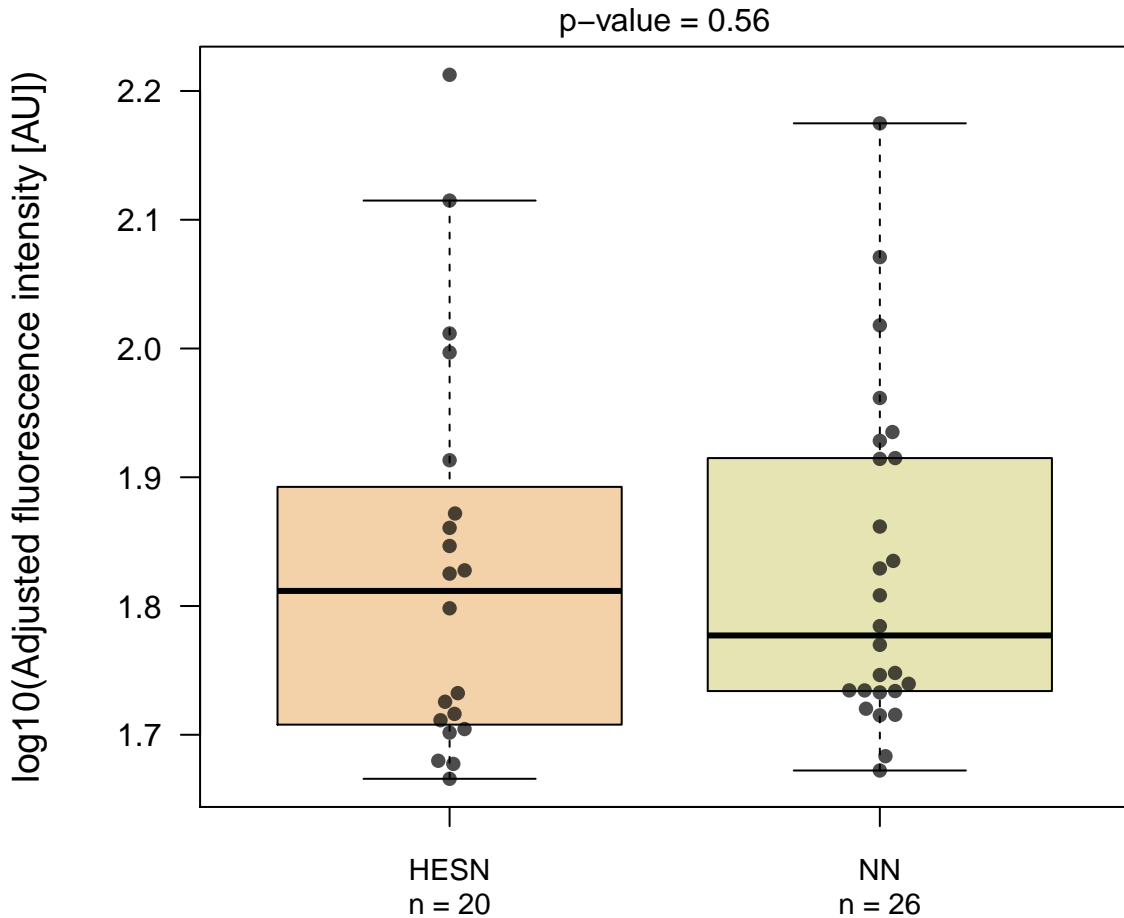

# FLNA

filamin A

Antibody: HPA001115

p-value = 0.58

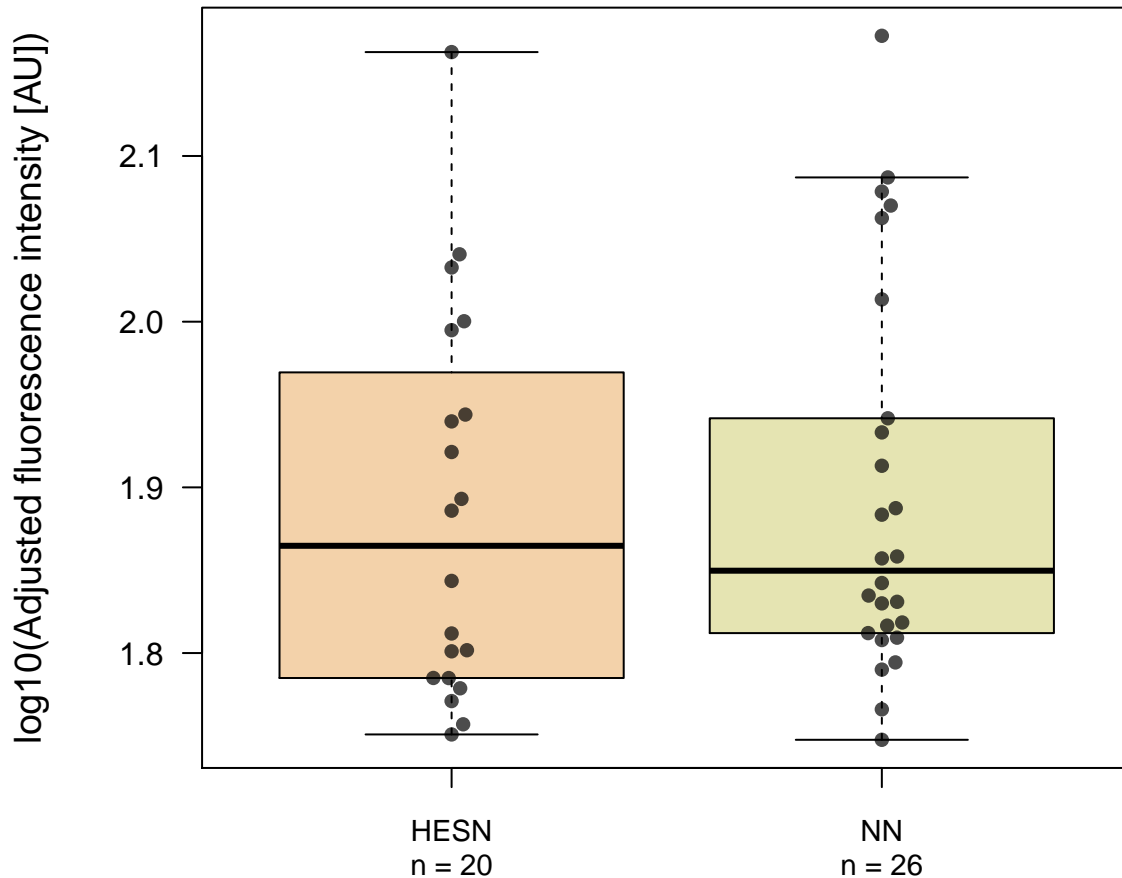



# KRT1

keratin 1

Antibody: HPA019797

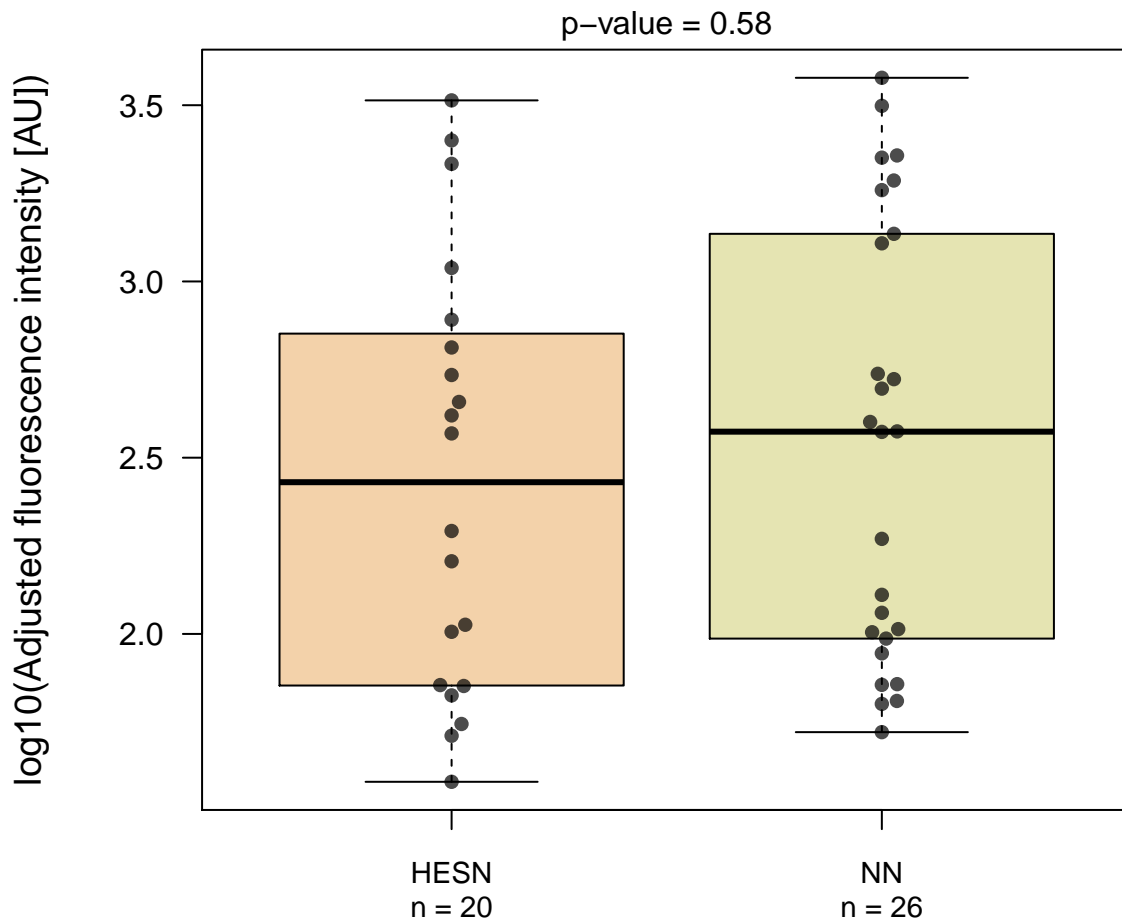

# MUC5AC

mucin 5AC, oligomeric mucus/gel-forming

Antibody: HPA040615

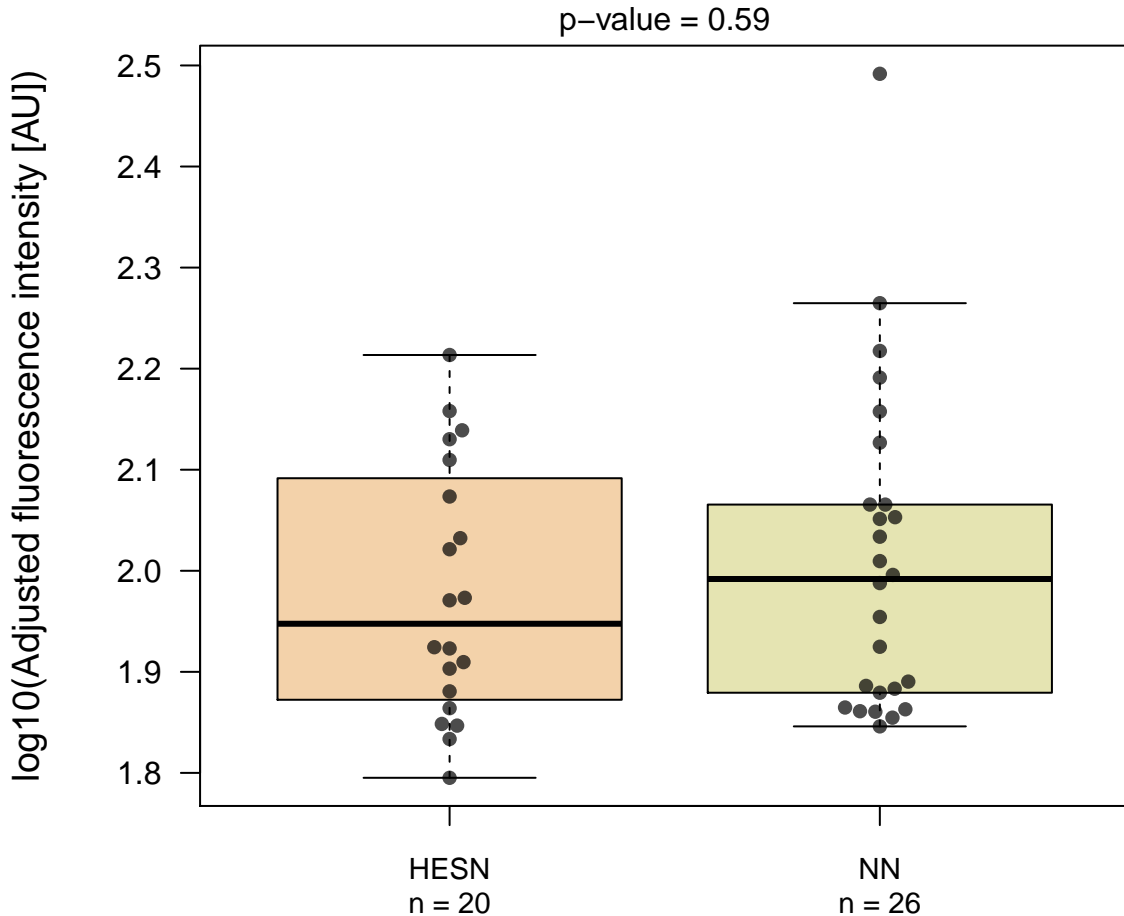

# TACSTD2

tumor associated calcium signal transducer 2

Antibody: HPA043104

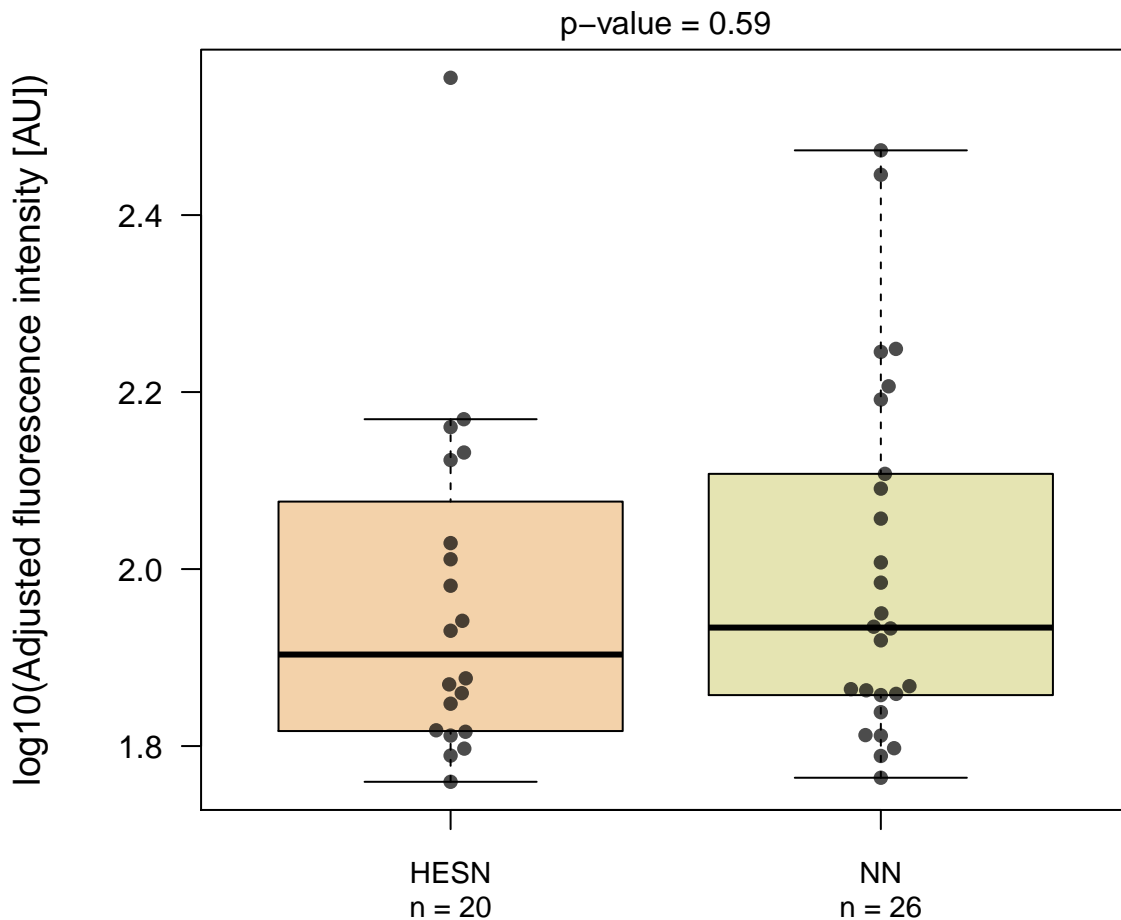

# GPX3

glutathione peroxidase 3

Antibody: HPA062579

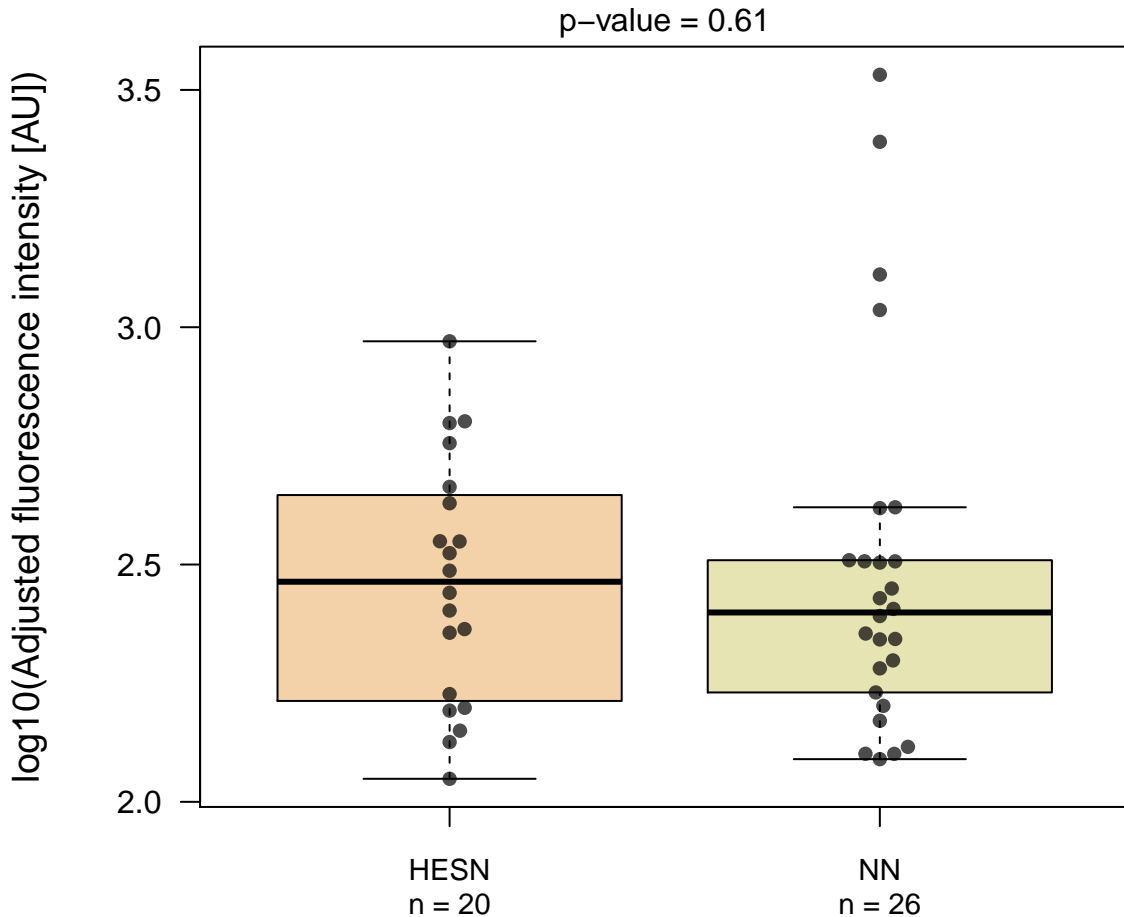

# KRT13

keratin 13

Antibody: HPA030877

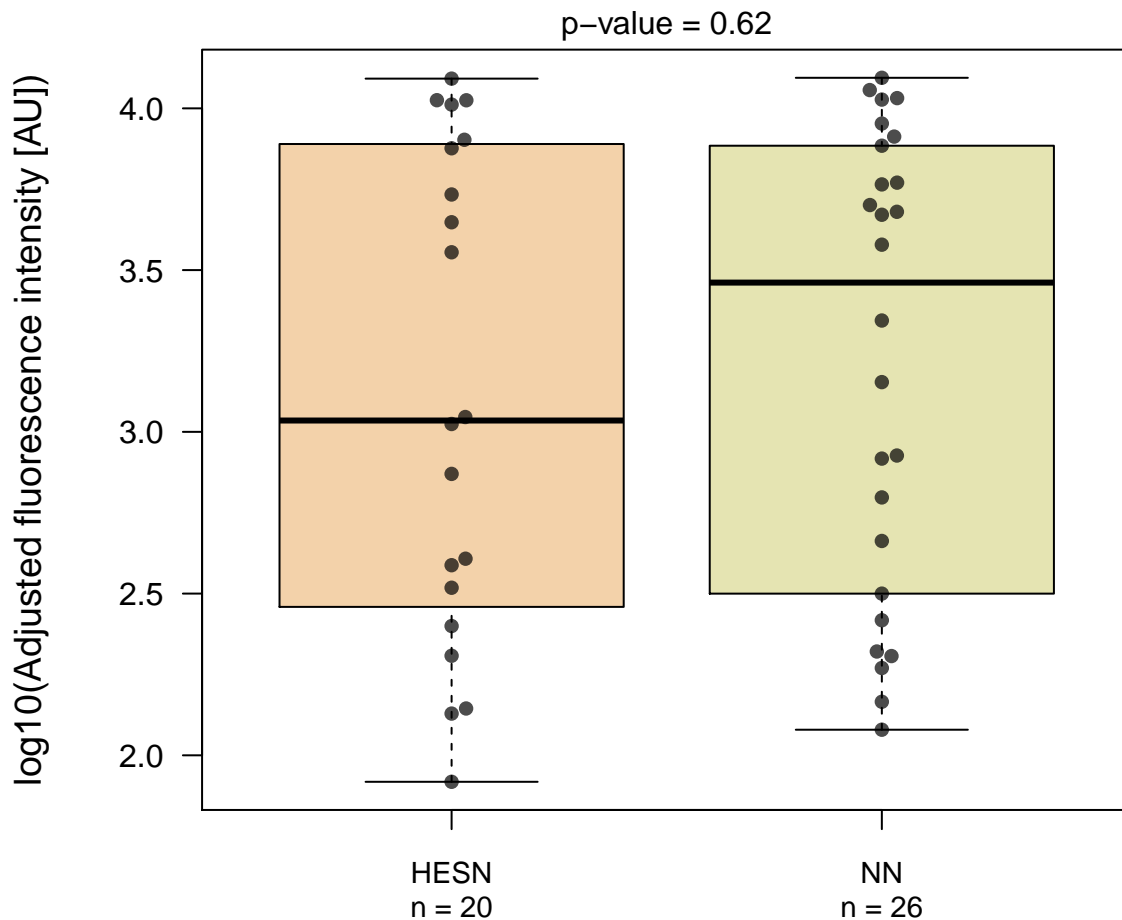

# BCAP31

B cell receptor associated protein 31

Antibody: HPA003906

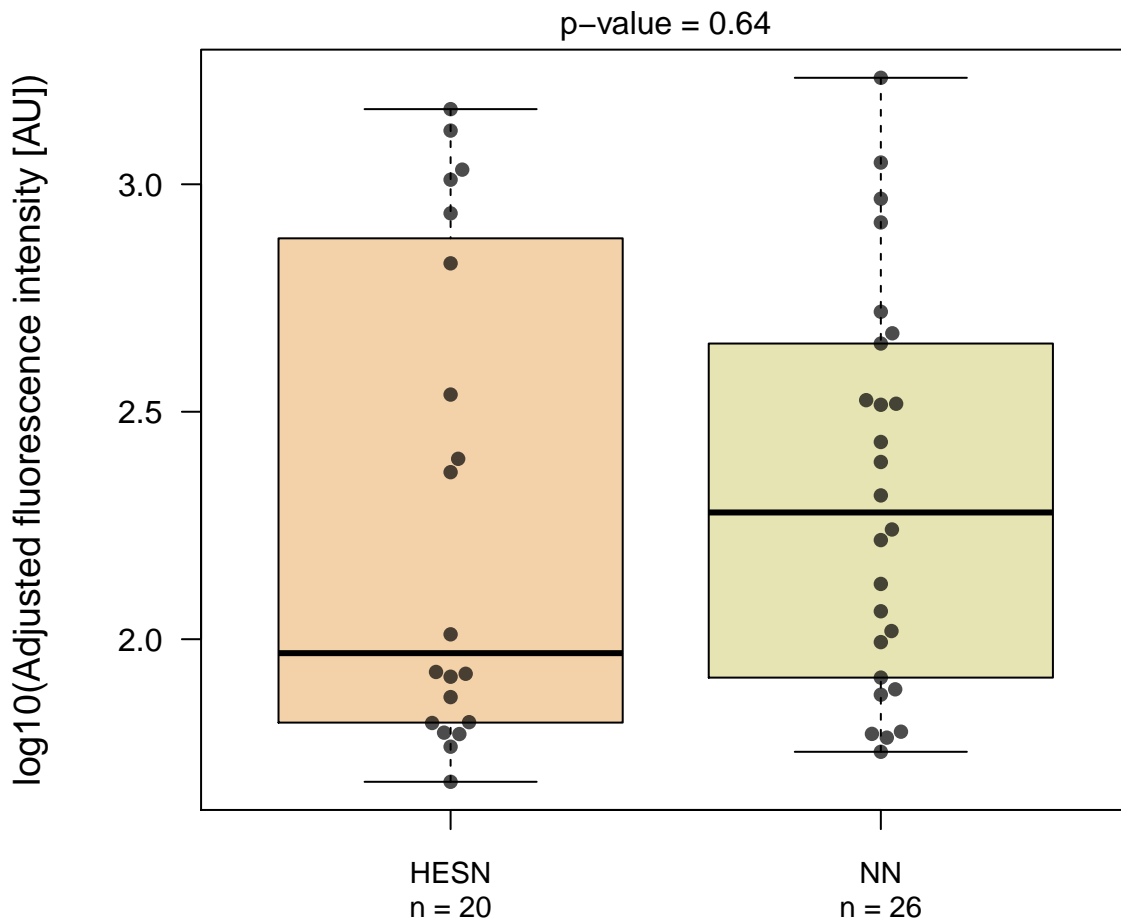

# CSTA

cystatin A

Antibody: HPA001031

p-value = 0.64

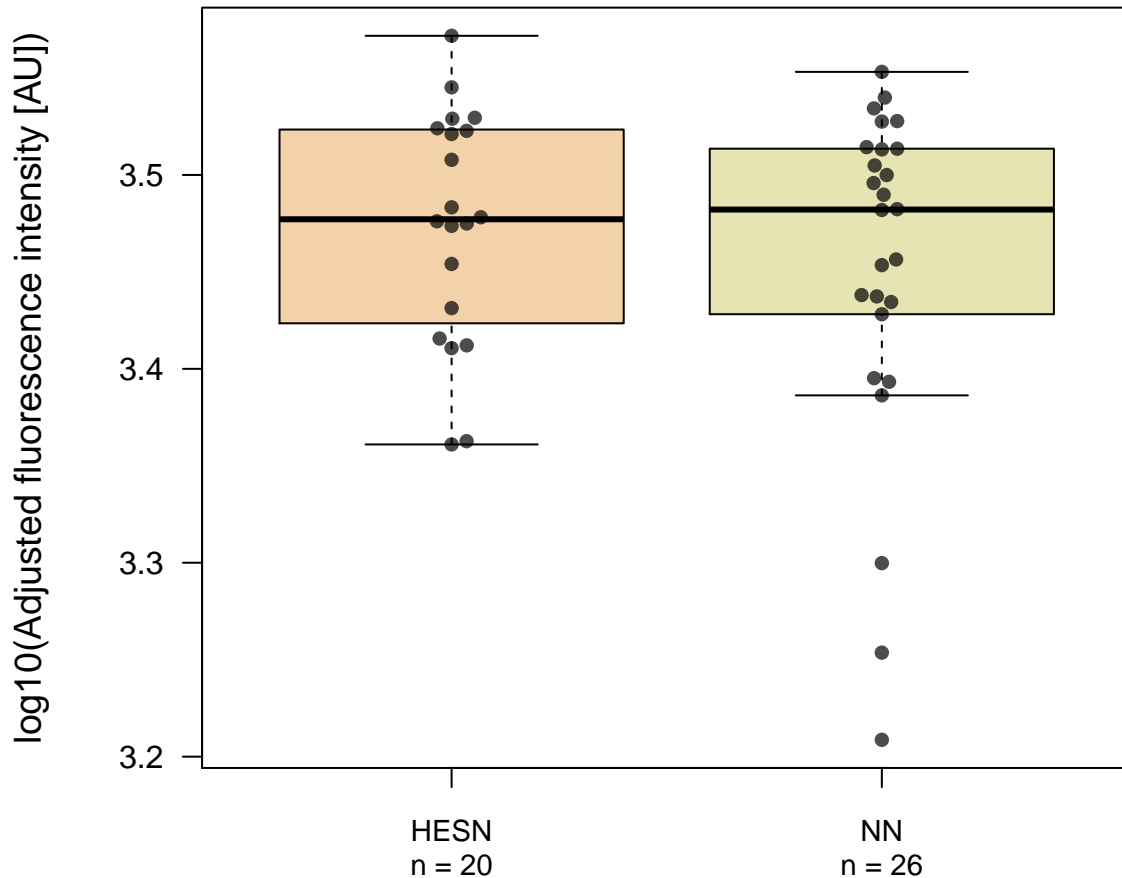

# LOR

loricrin

Antibody: HPA076123

p-value = 0.67

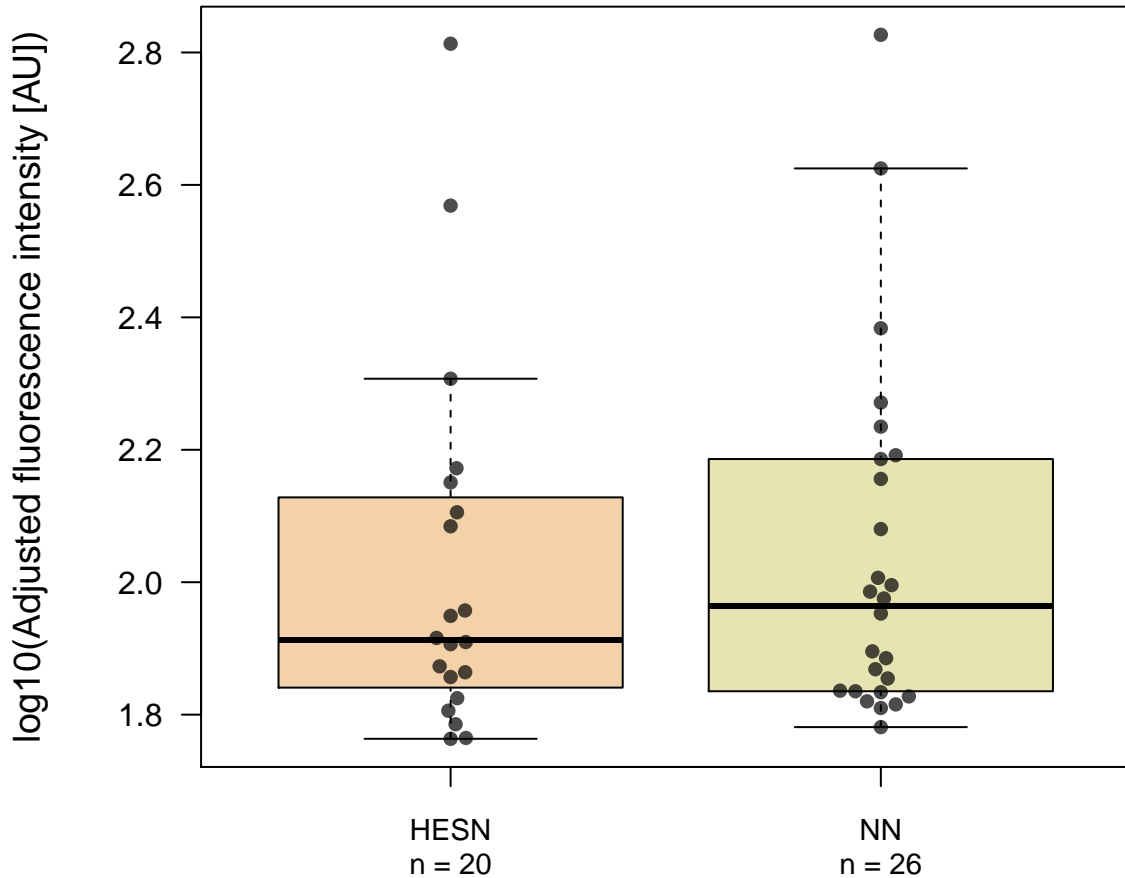



# DEFA3,DEFA1,DEFA1B

defensin alpha 3,defensin alpha 1,defensin alpha 1B

Antibody: HPA044693

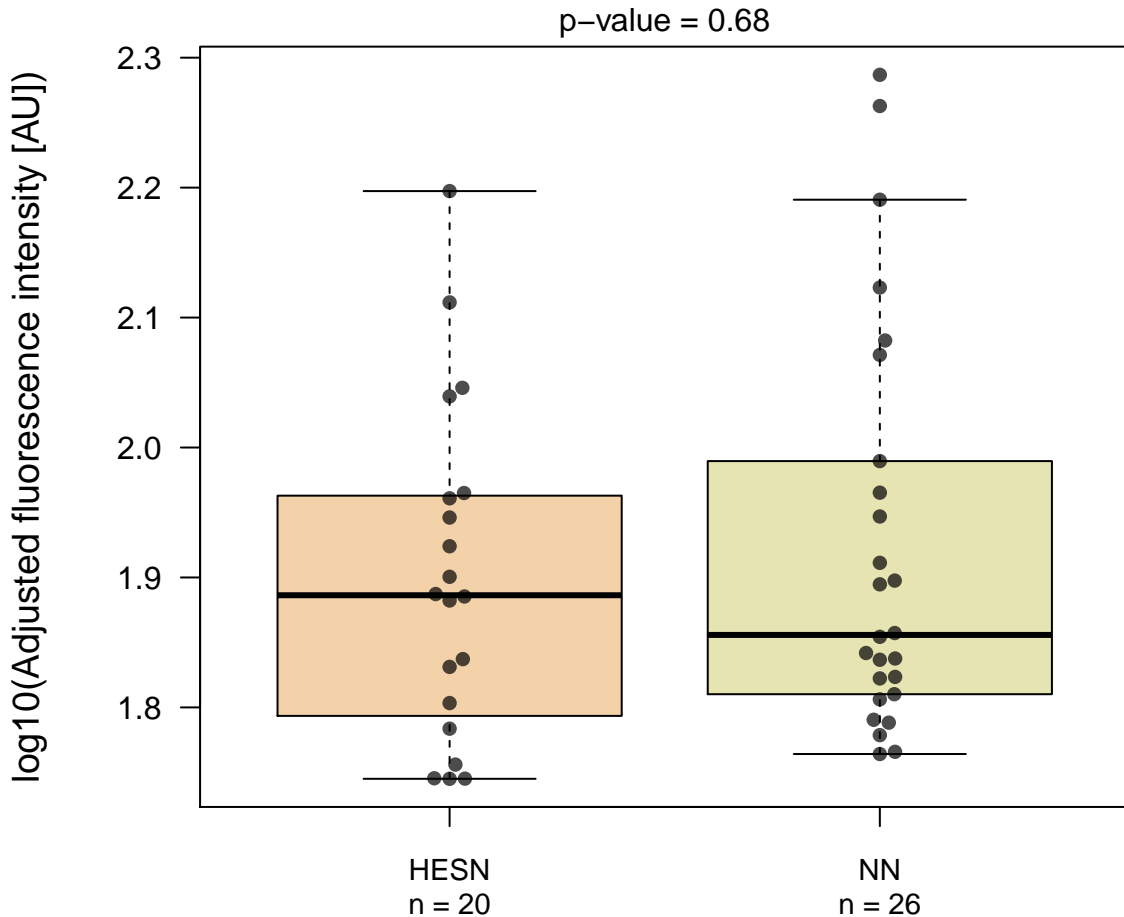

# CSTB

cystatin B

Antibody: HPA058557

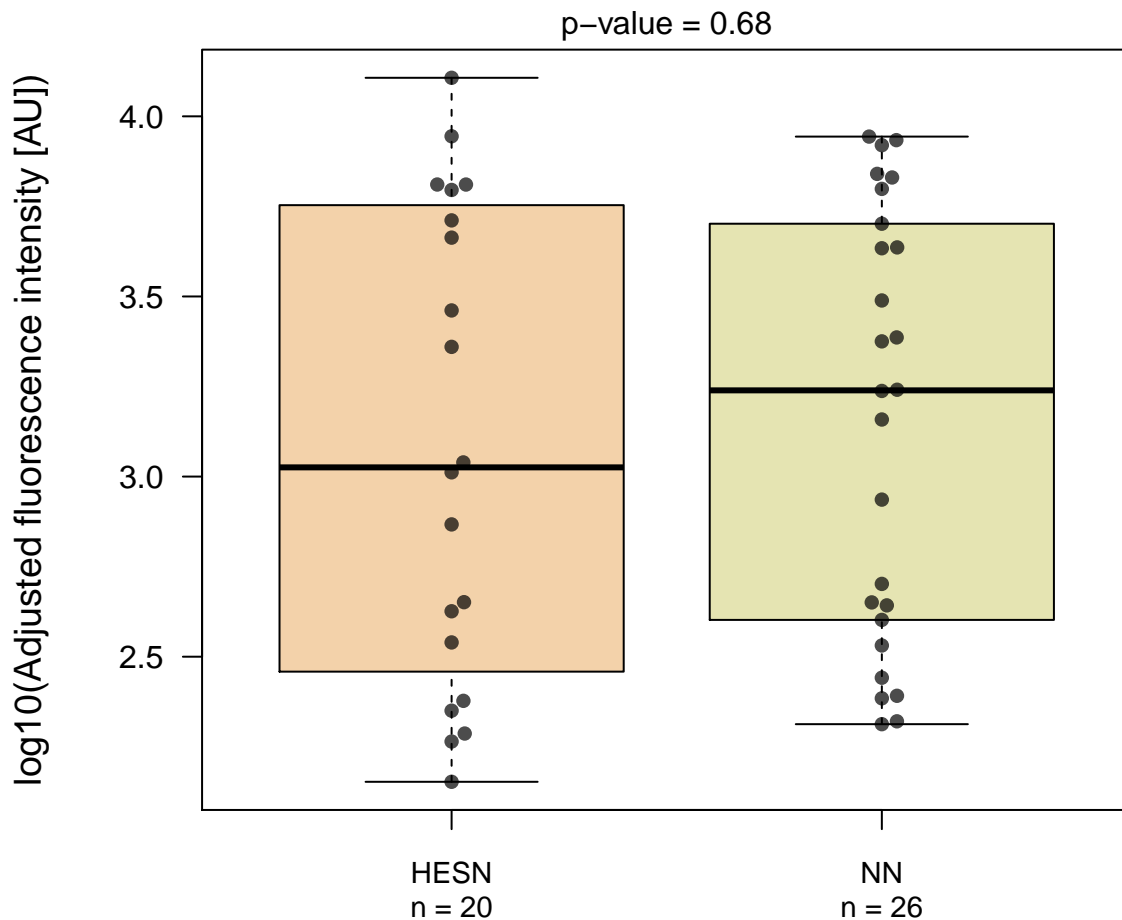

# KRT14

keratin 14

Antibody: HPA023040

p-value = 0.70

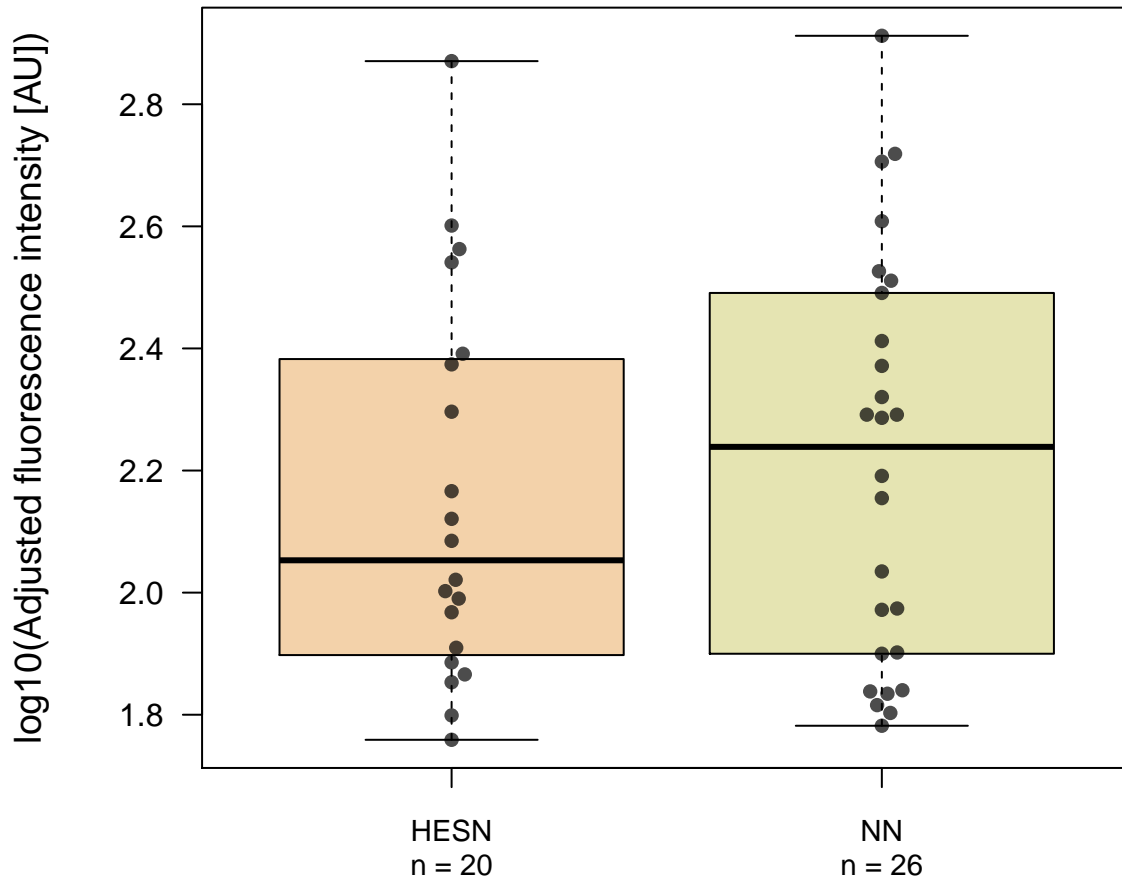

# KRT1

keratin 1

Antibody: HPA062908

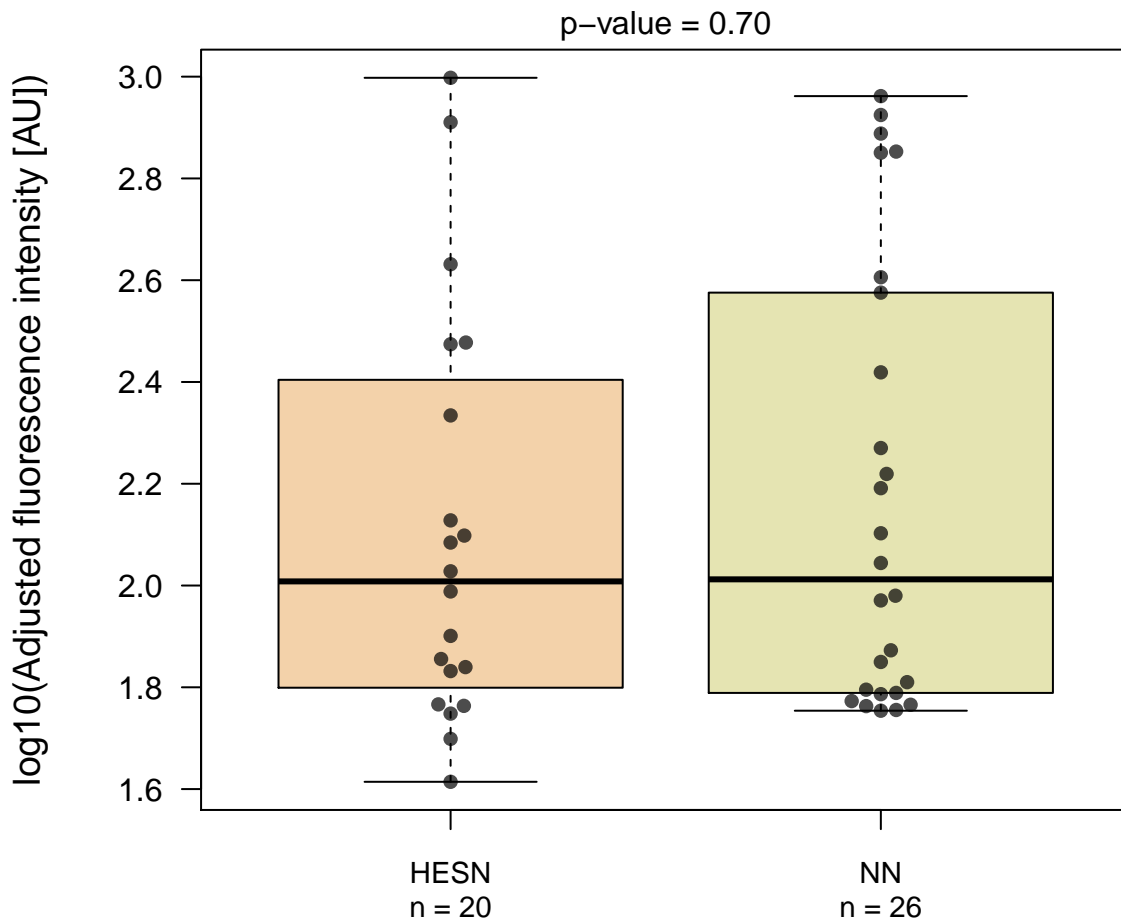

# ANXA3

annexin A3

Antibody: HPA013431

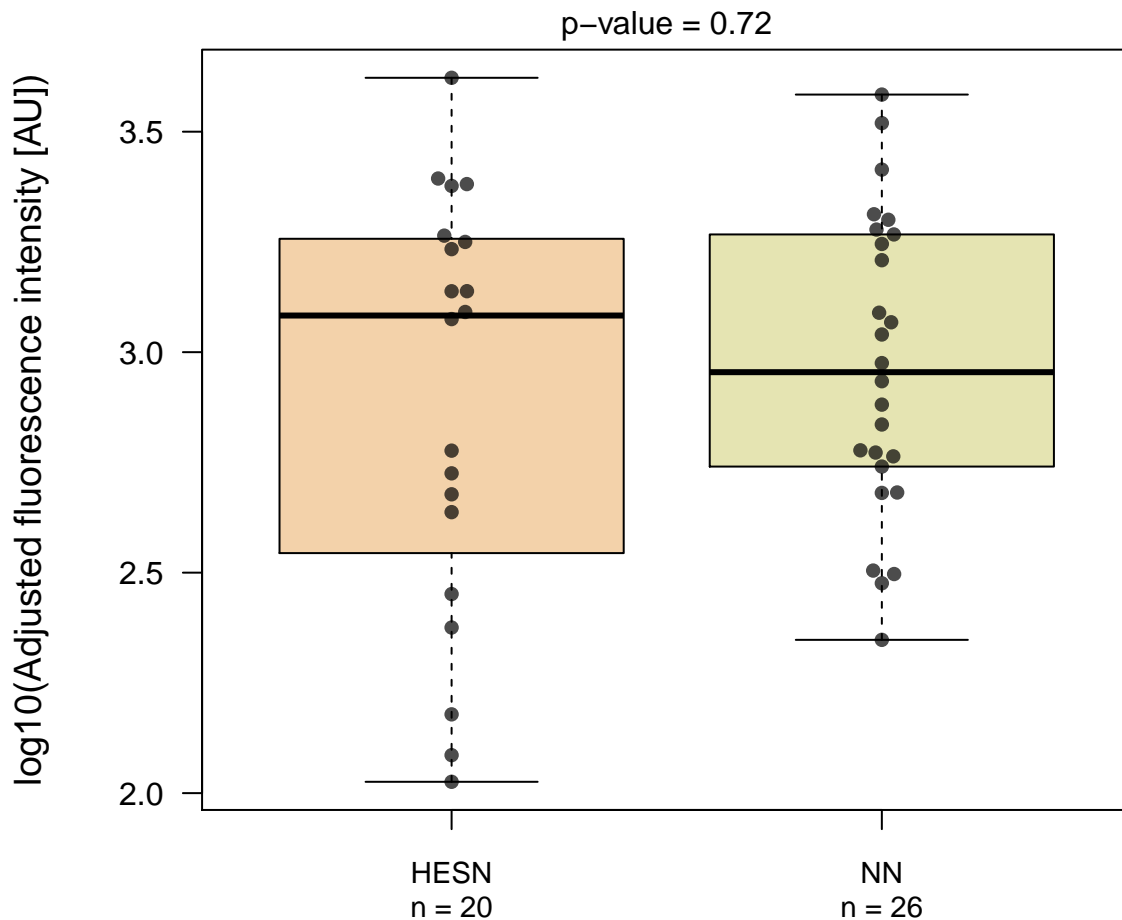

# LGMN

legumain

Antibody: HPA000799

p-value = 0.73

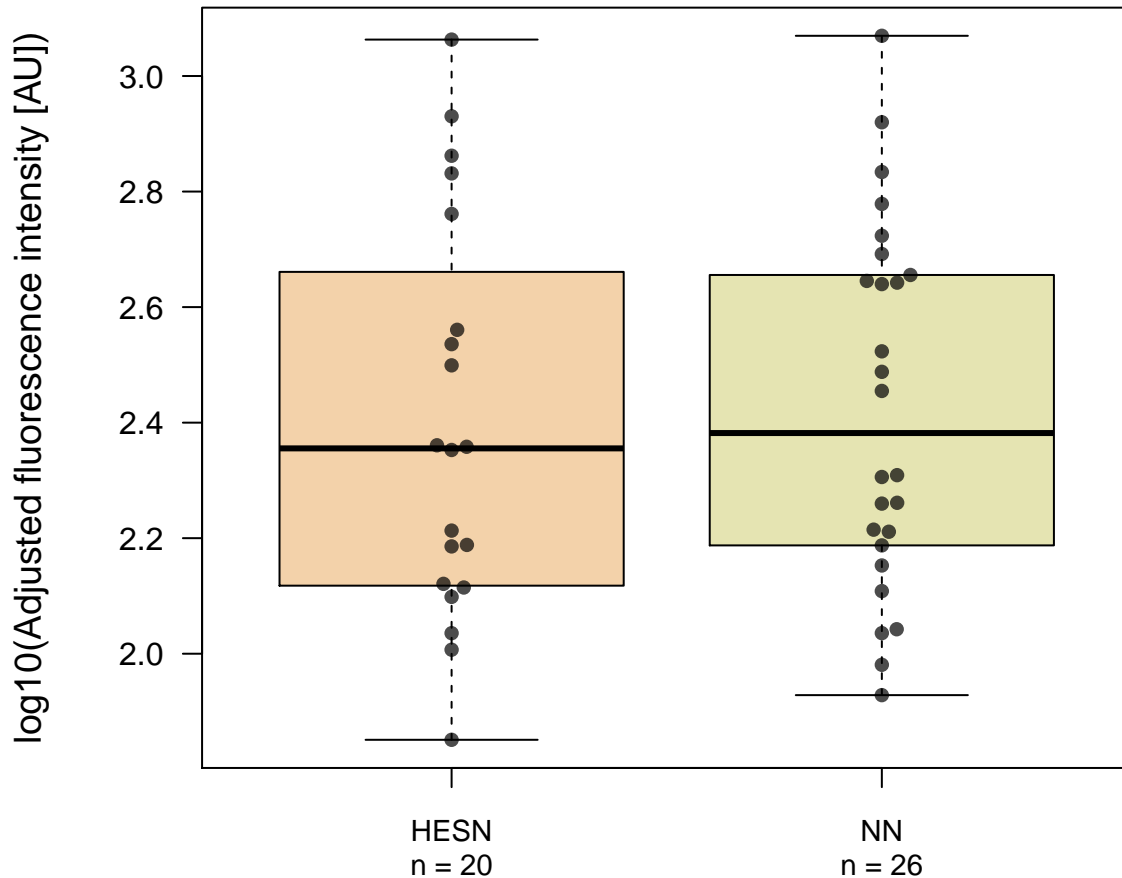

# SPINK5

serine peptidase inhibitor, Kazal type 5

Antibody: HPA009067

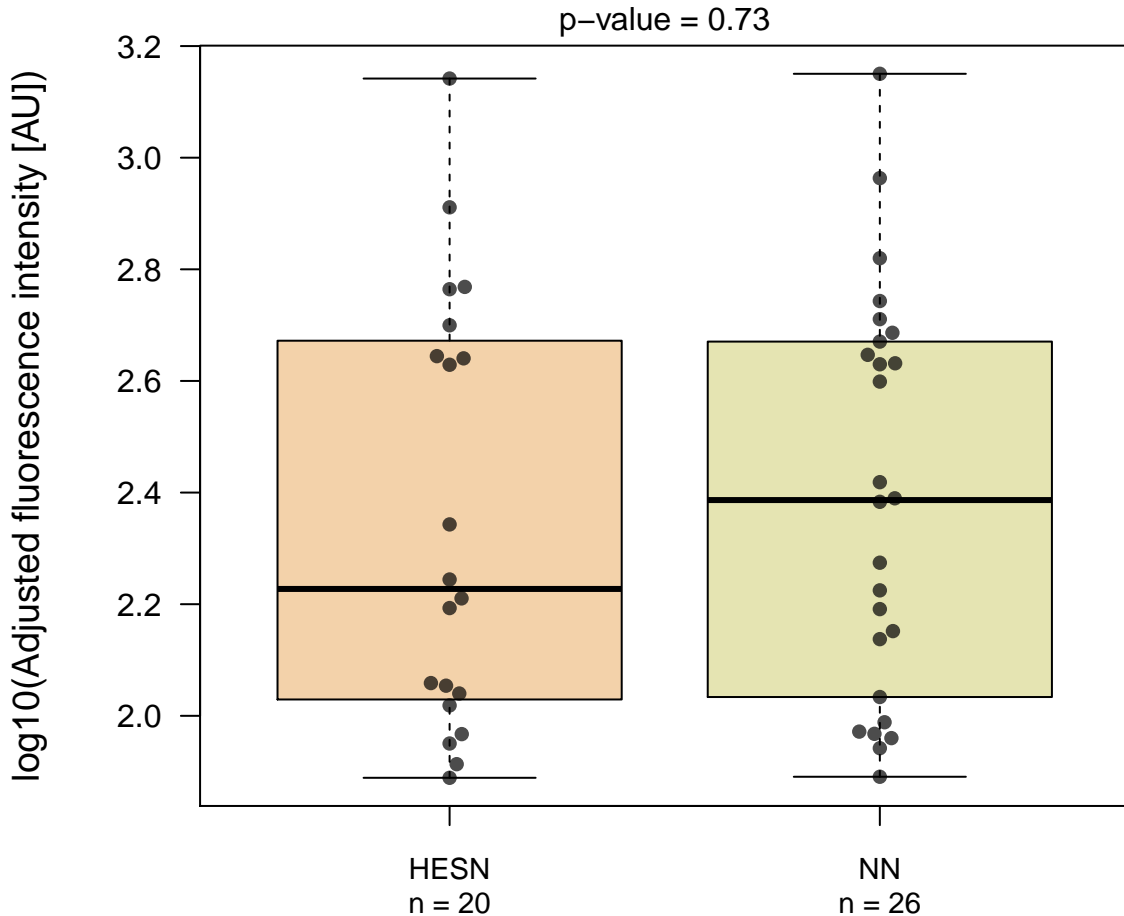

# CRNN

cornulin

Antibody: HPA024343

p-value = 0.73

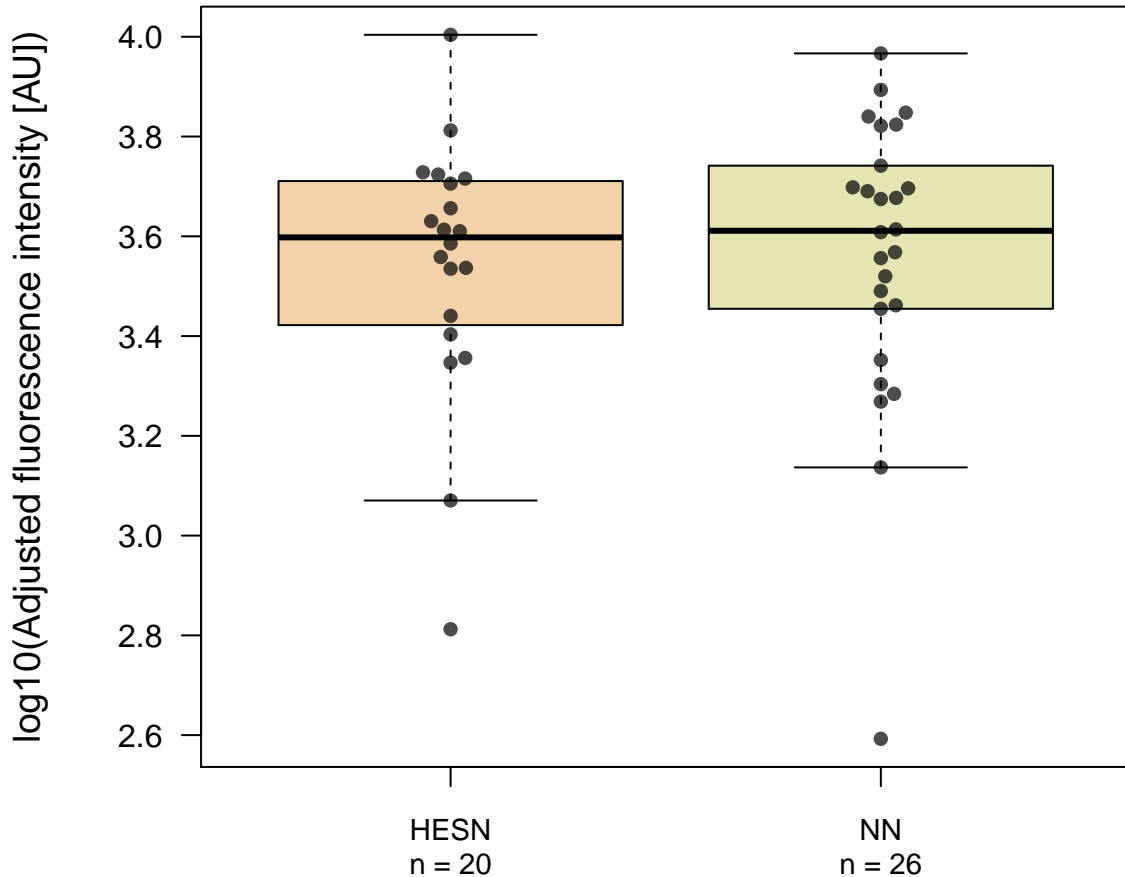



# NCF2

neutrophil cytosolic factor 2

Antibody: HPA006040

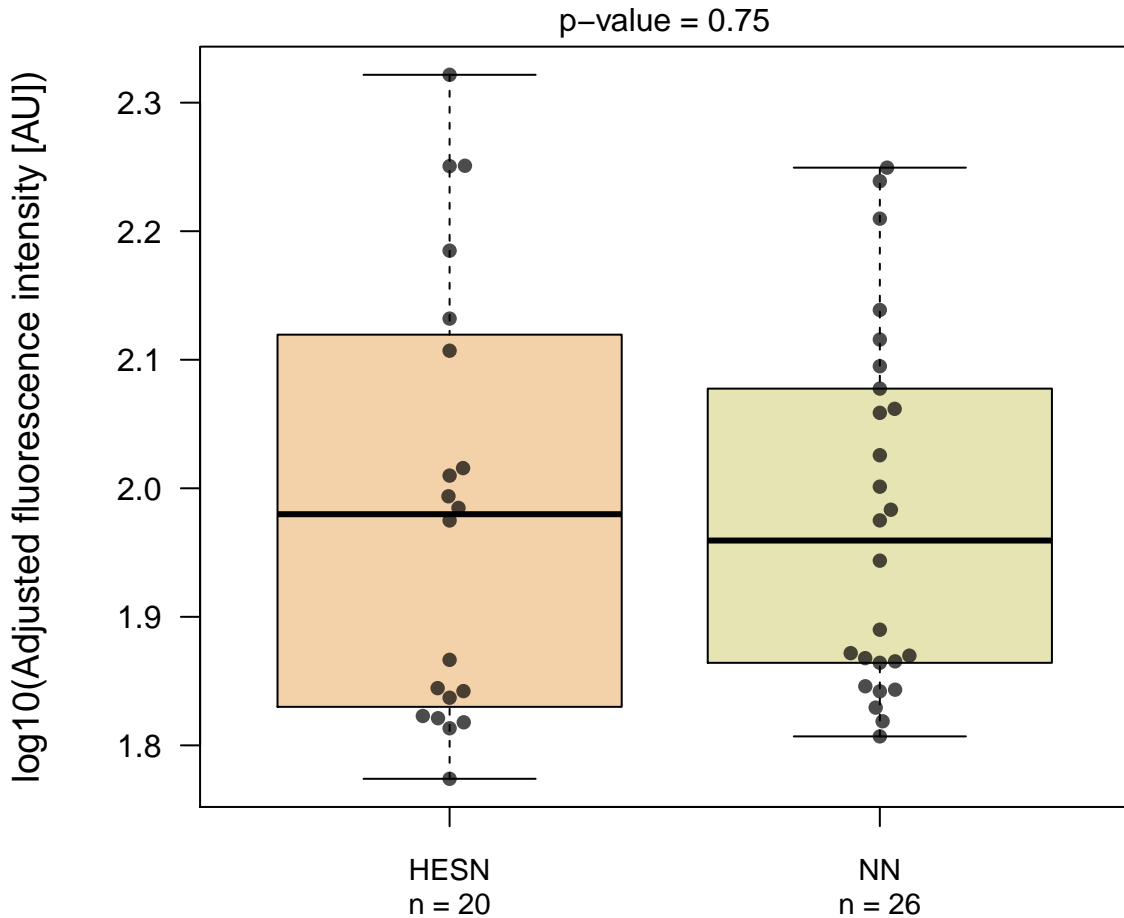

# KLK11

kallikrein related peptidase 11

Antibody: HPA038938

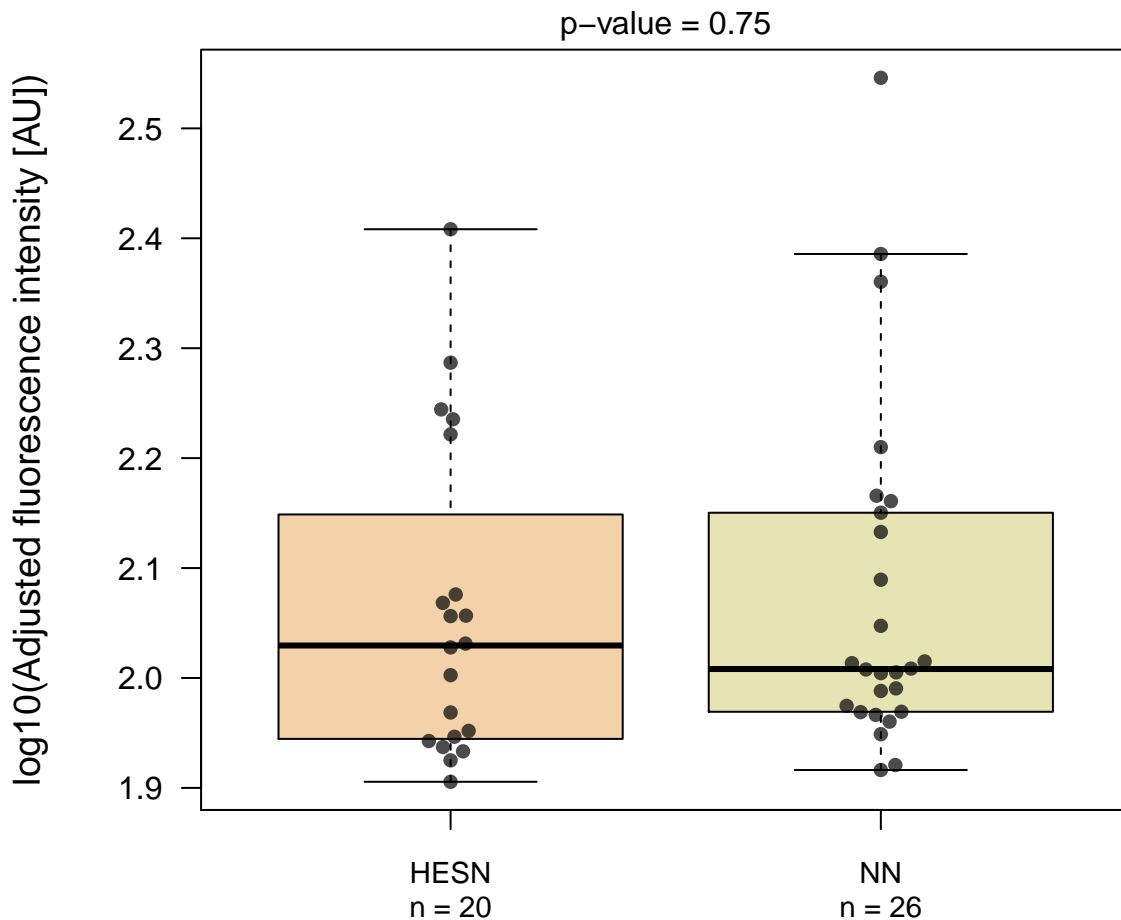

# LGMN

legumain

Antibody: HPA001426

p-value = 0.77

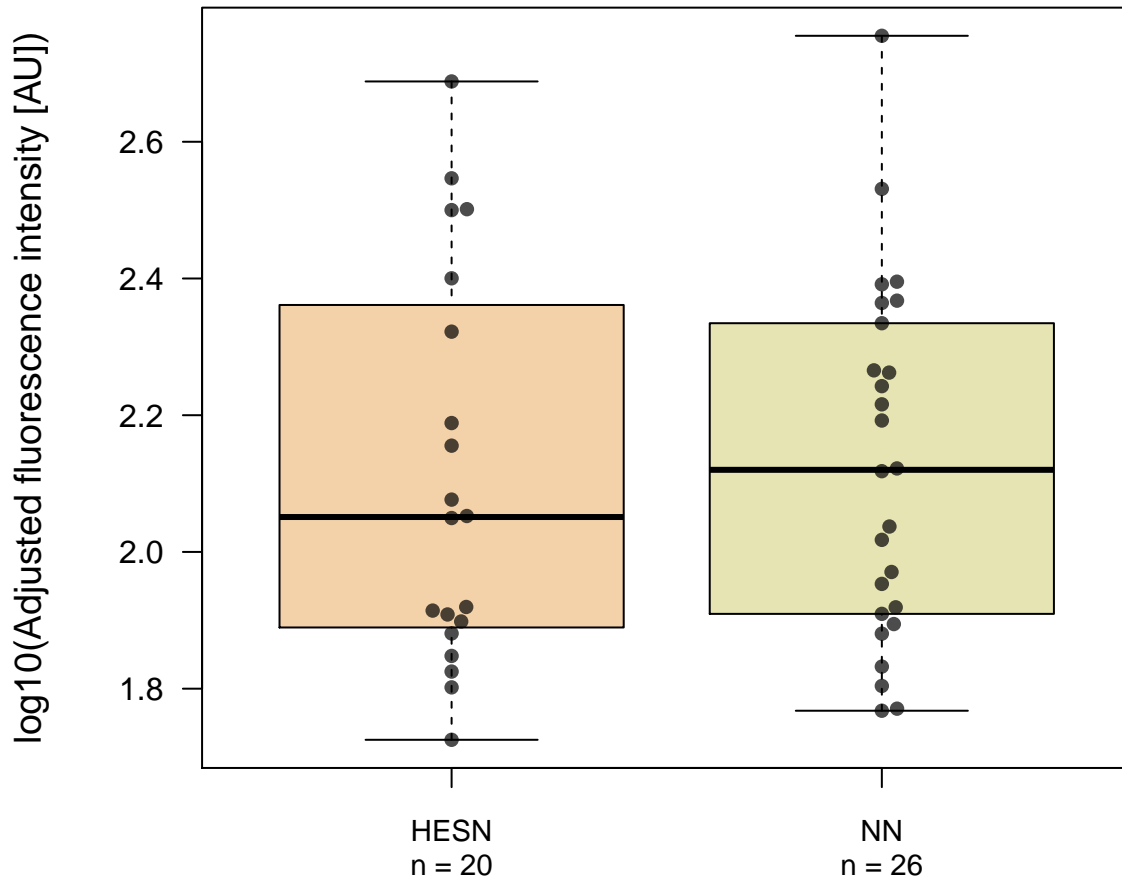

# KRT1

keratin 1

Antibody: HPA017917

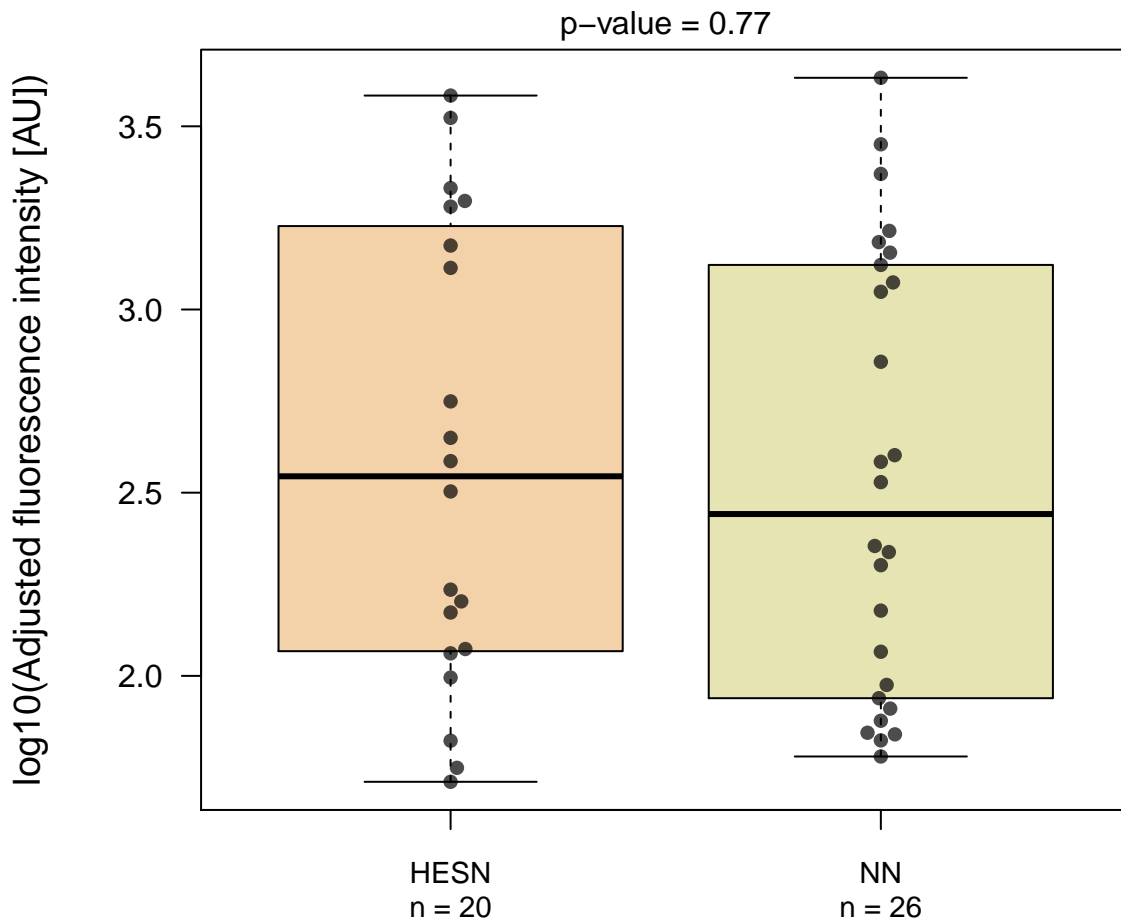

# PLAUR

plasminogen activator, urokinase receptor

Antibody: HPA050843

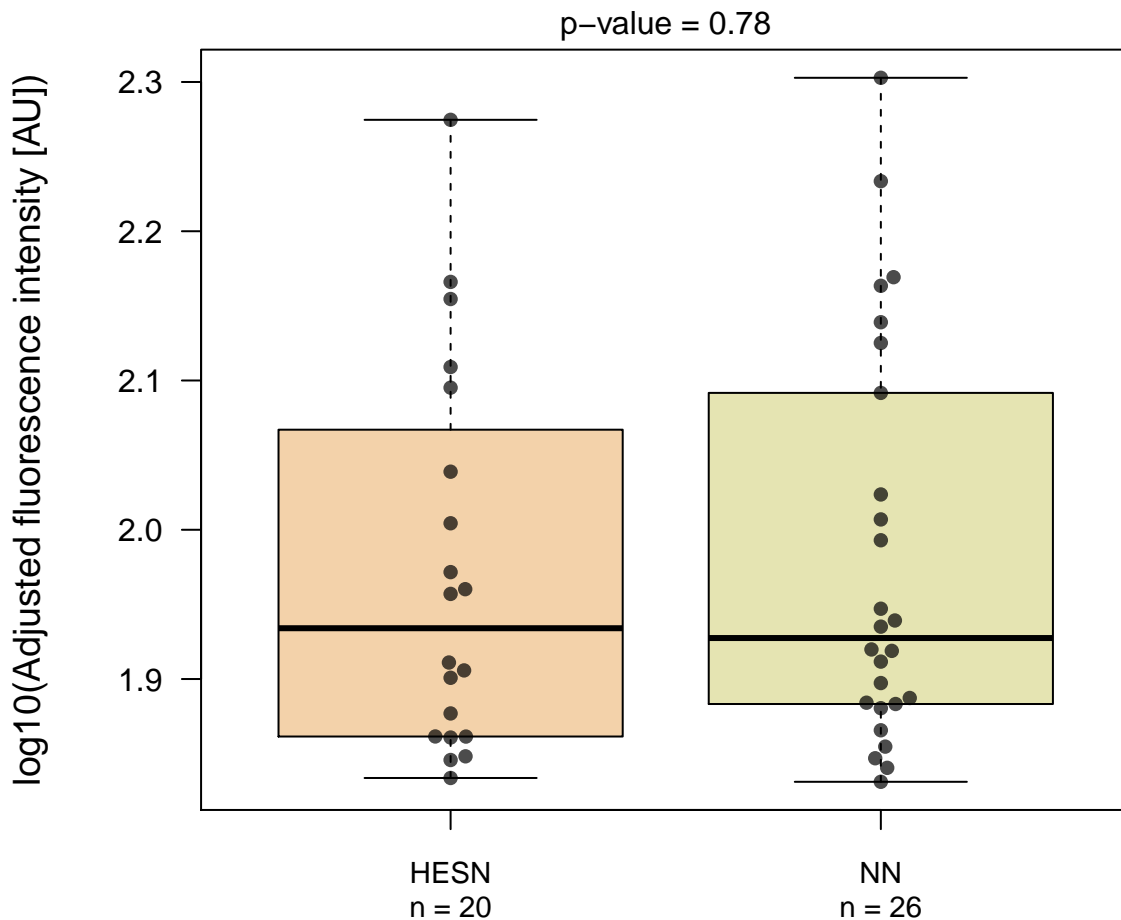

# KRT5

keratin 5

Antibody: HPA059479

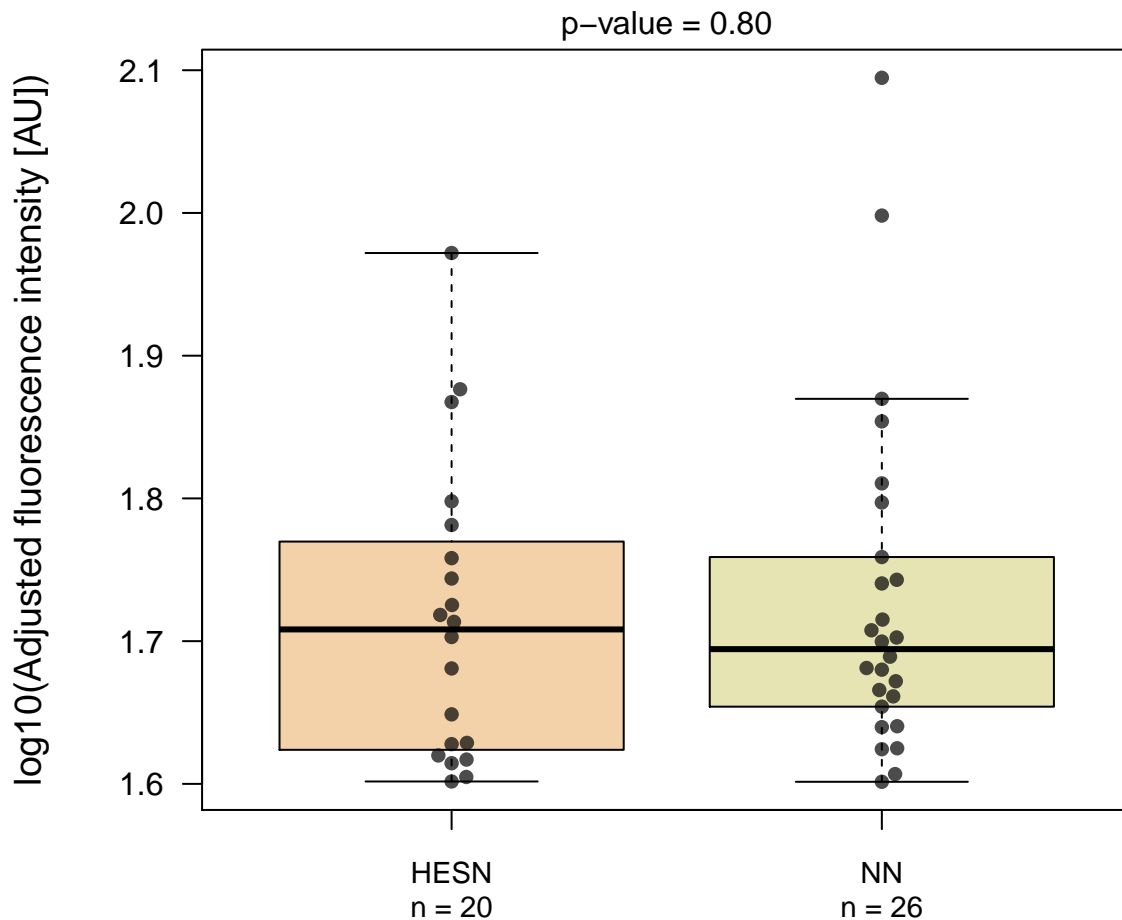

# CSTA

cystatin A

Antibody: HPA000392

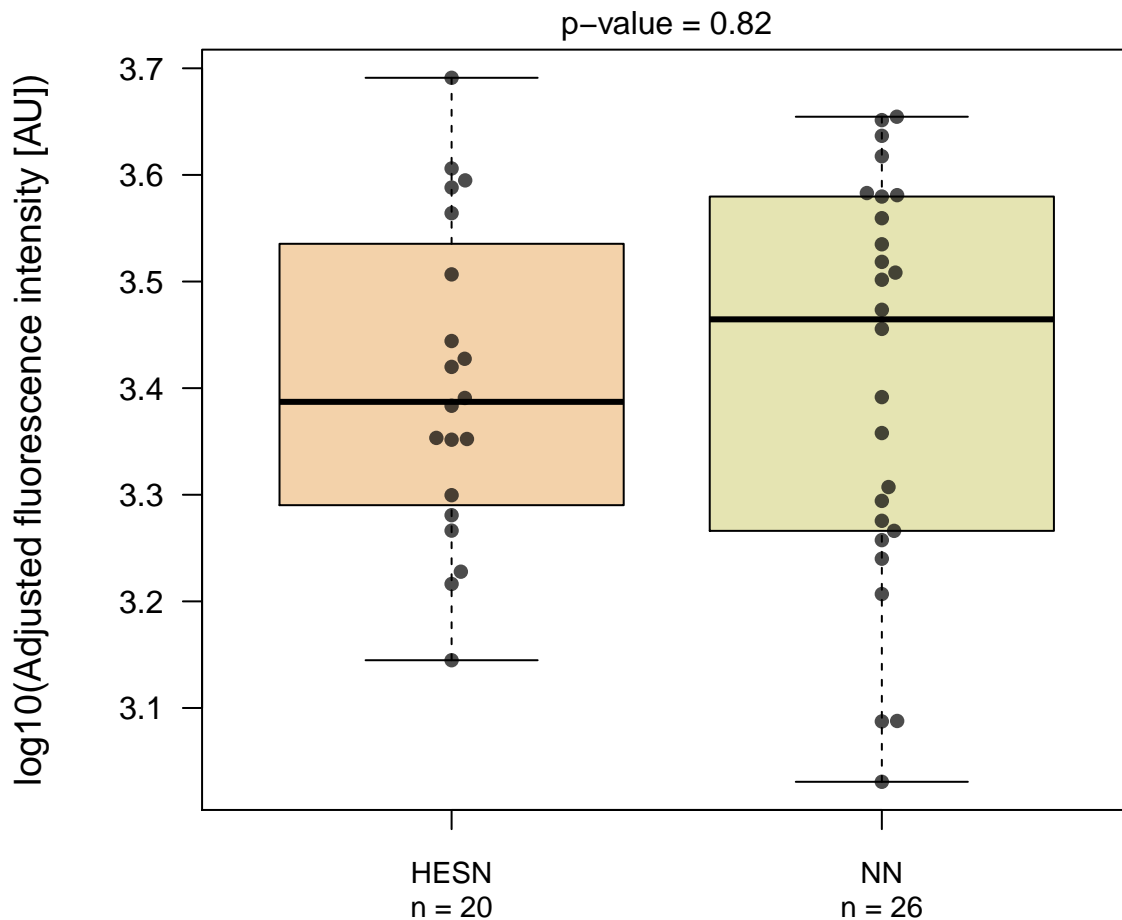

# DEFA5

defensin alpha 5

Antibody: HPA015775

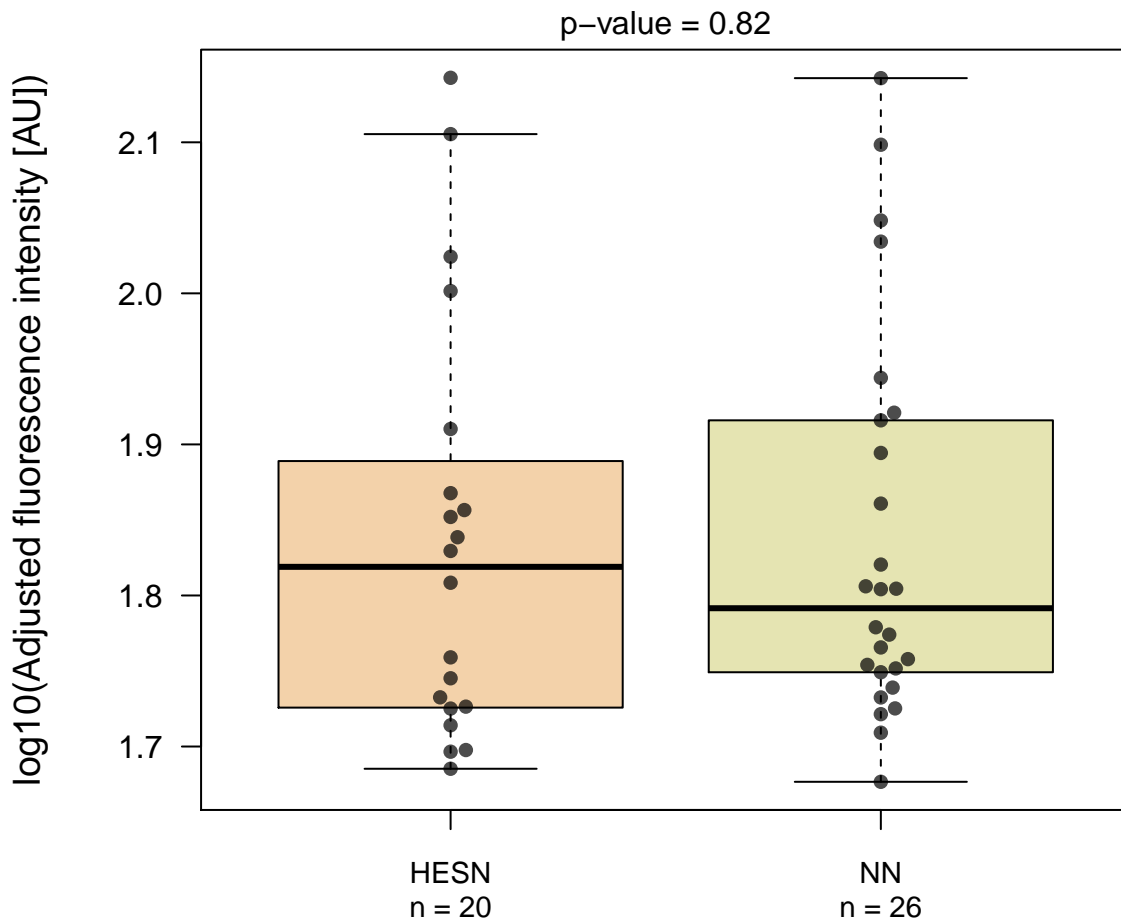



# CAPN1

calpain 1

Antibody: HPA005992

p-value = 0.83

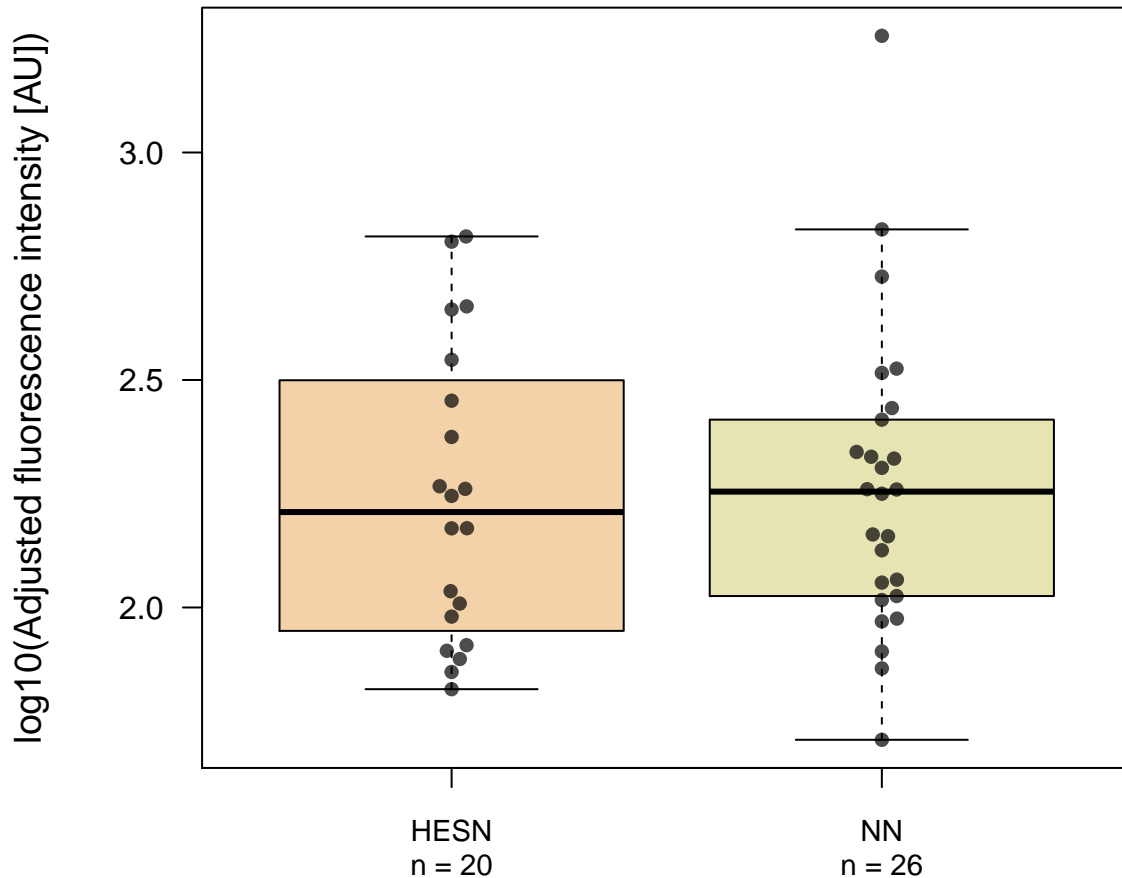

# S100A12

S100 calcium binding protein A12

Antibody: HPA003620

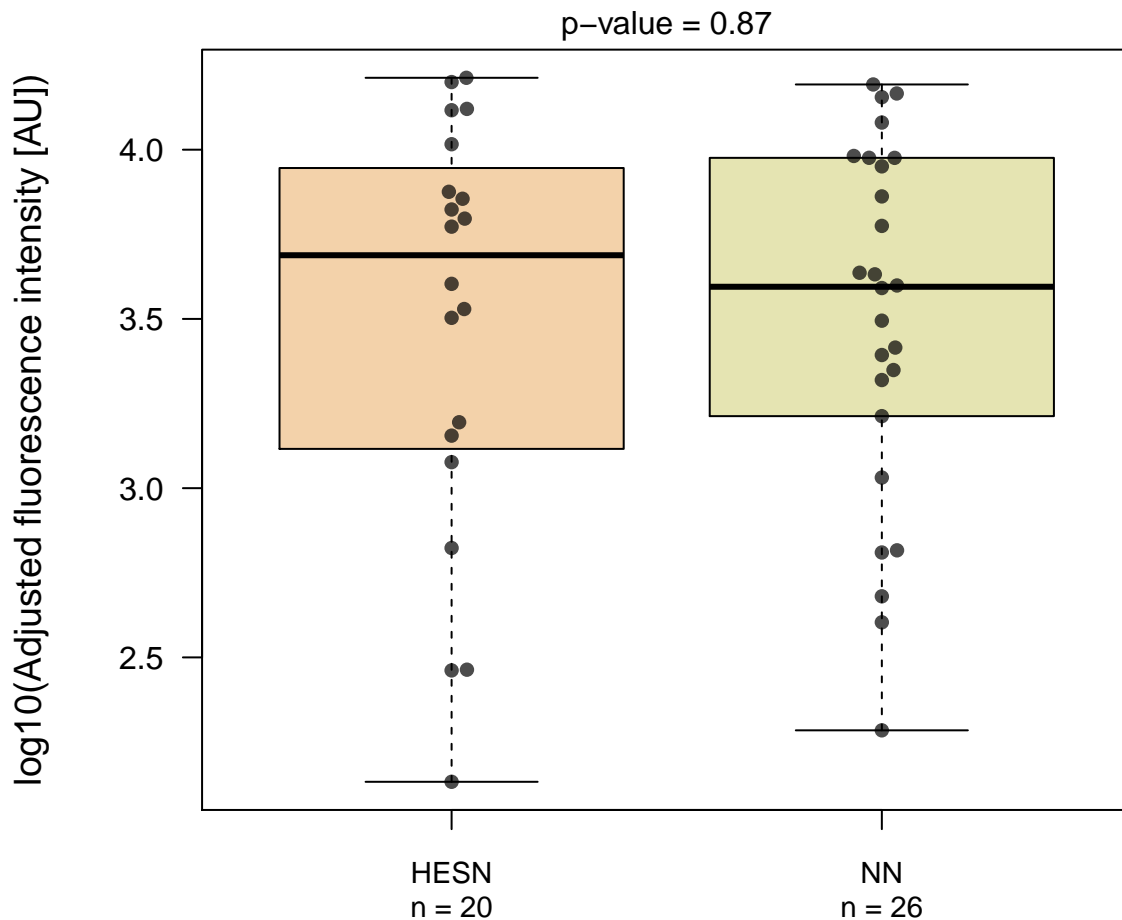

# ANXA3

annexin A3

Antibody: HPA013398

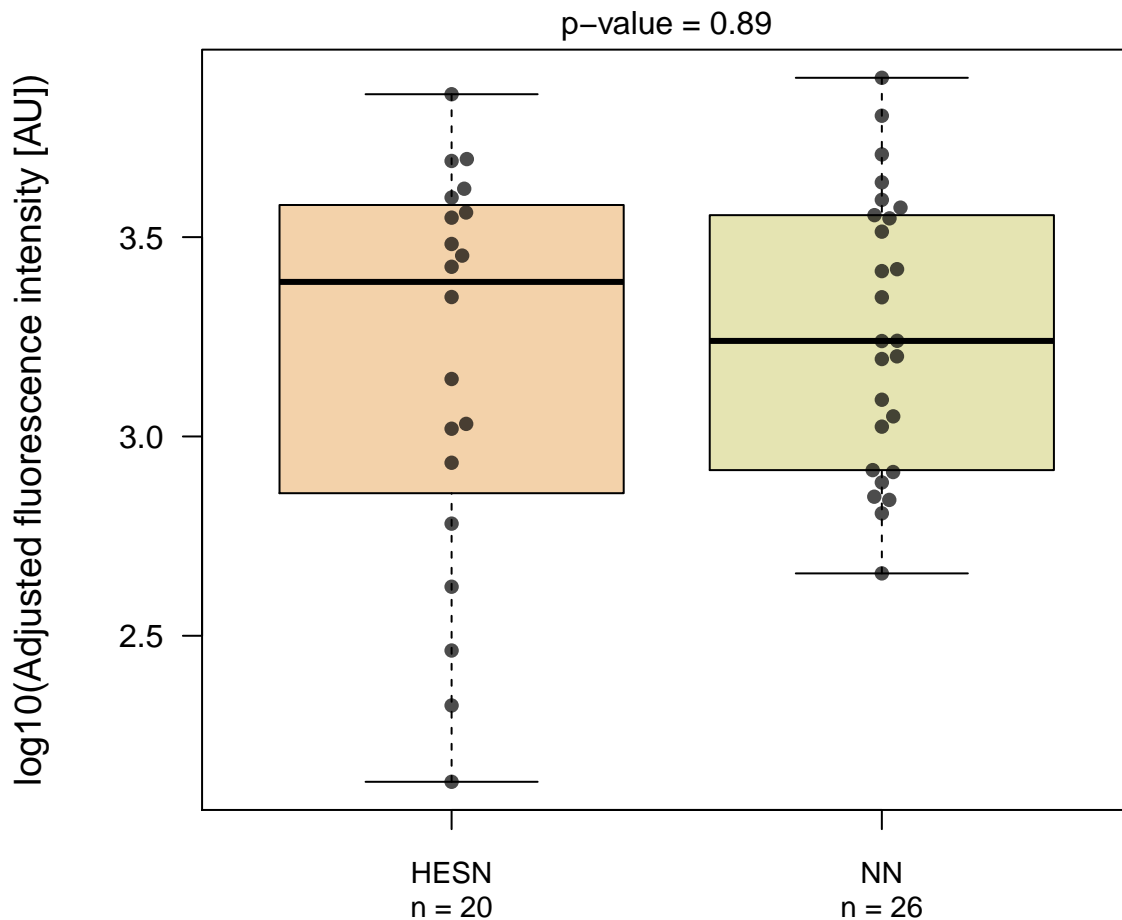

# CSTB

cystatin B

Antibody: HPA017380

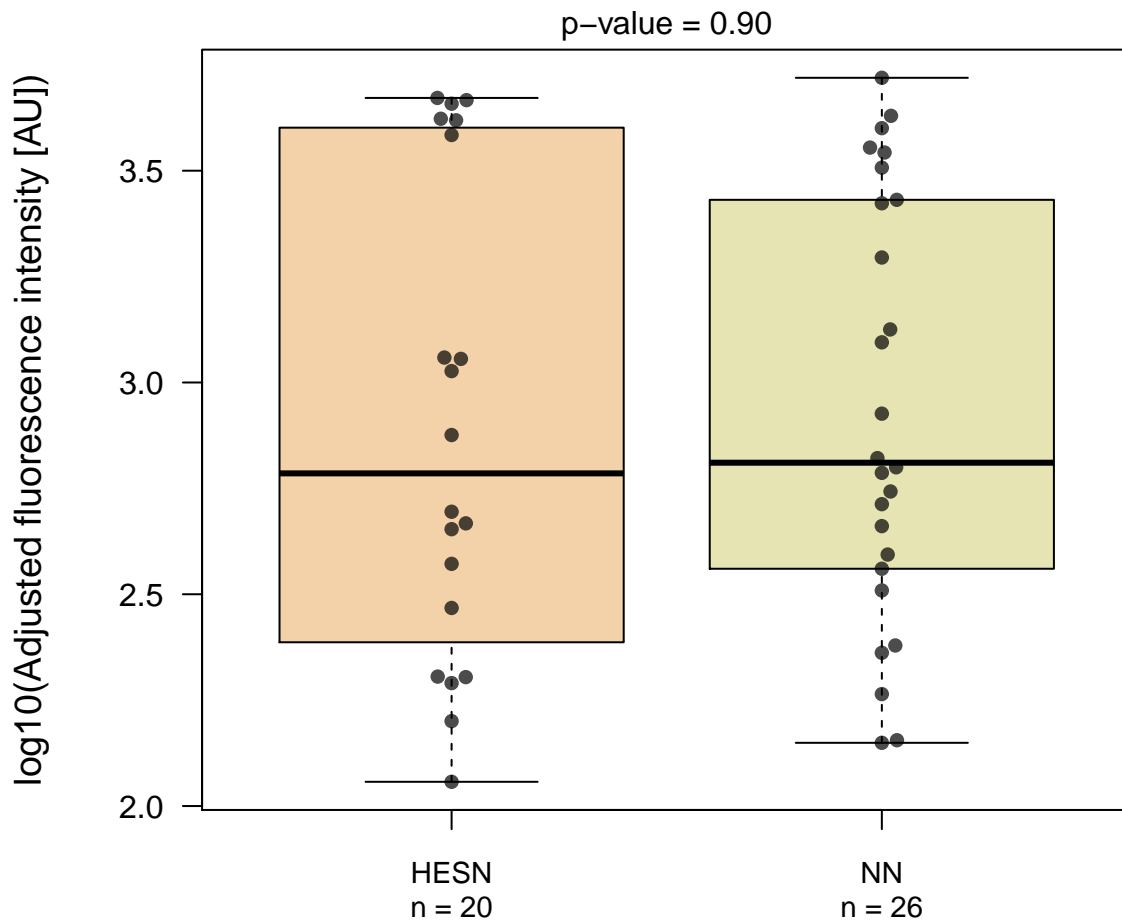

# CORO1A

coronin 1A

Antibody: HPA051132

p-value = 0.90

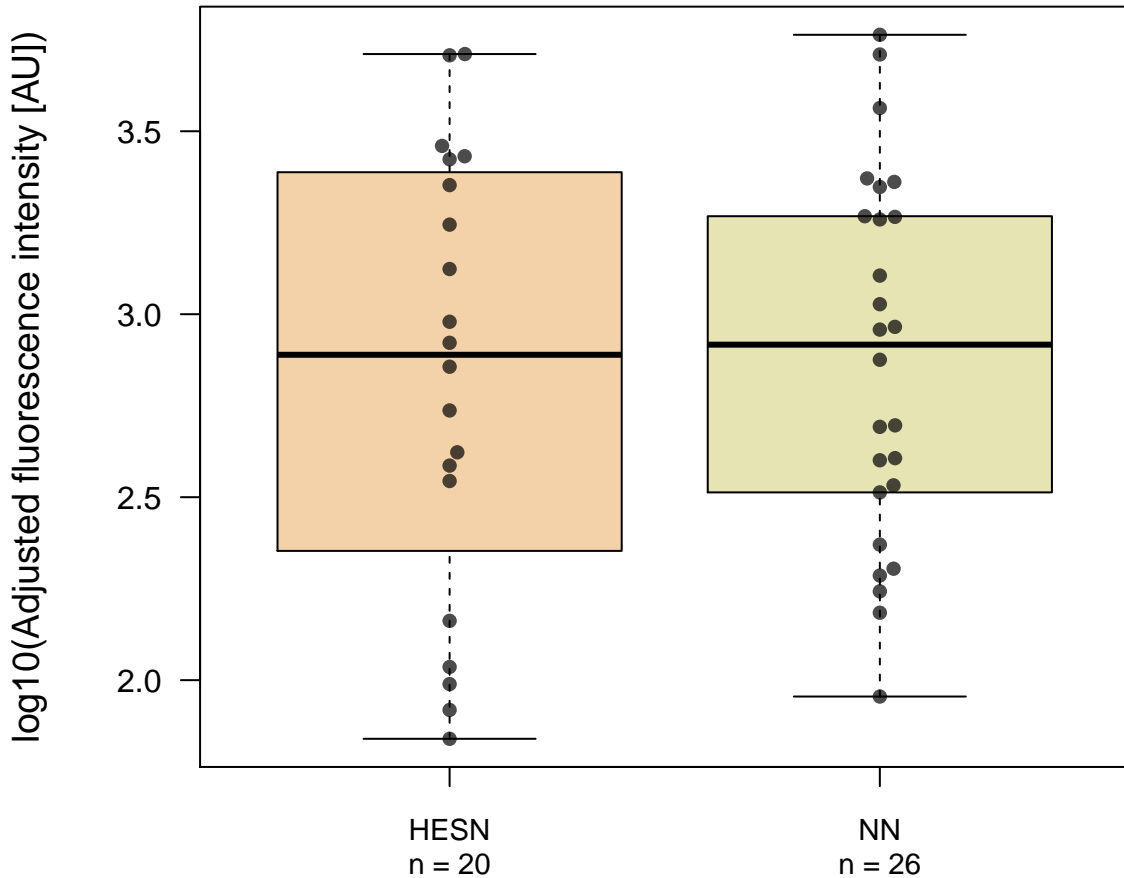

# ITIH2

inter-alpha-trypsin inhibitor heavy chain 2

Antibody: HPA062964

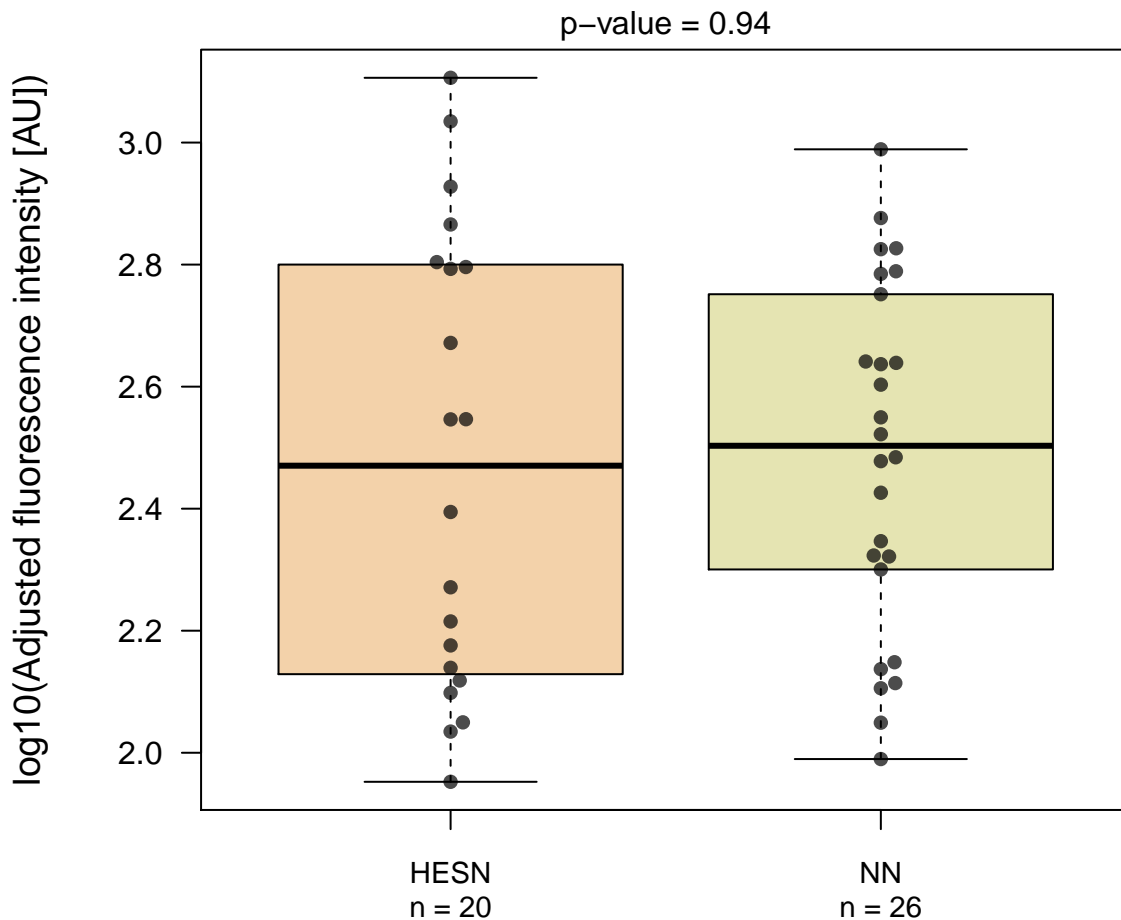

# S100A12

S100 calcium binding protein A12

Antibody: HPA002881

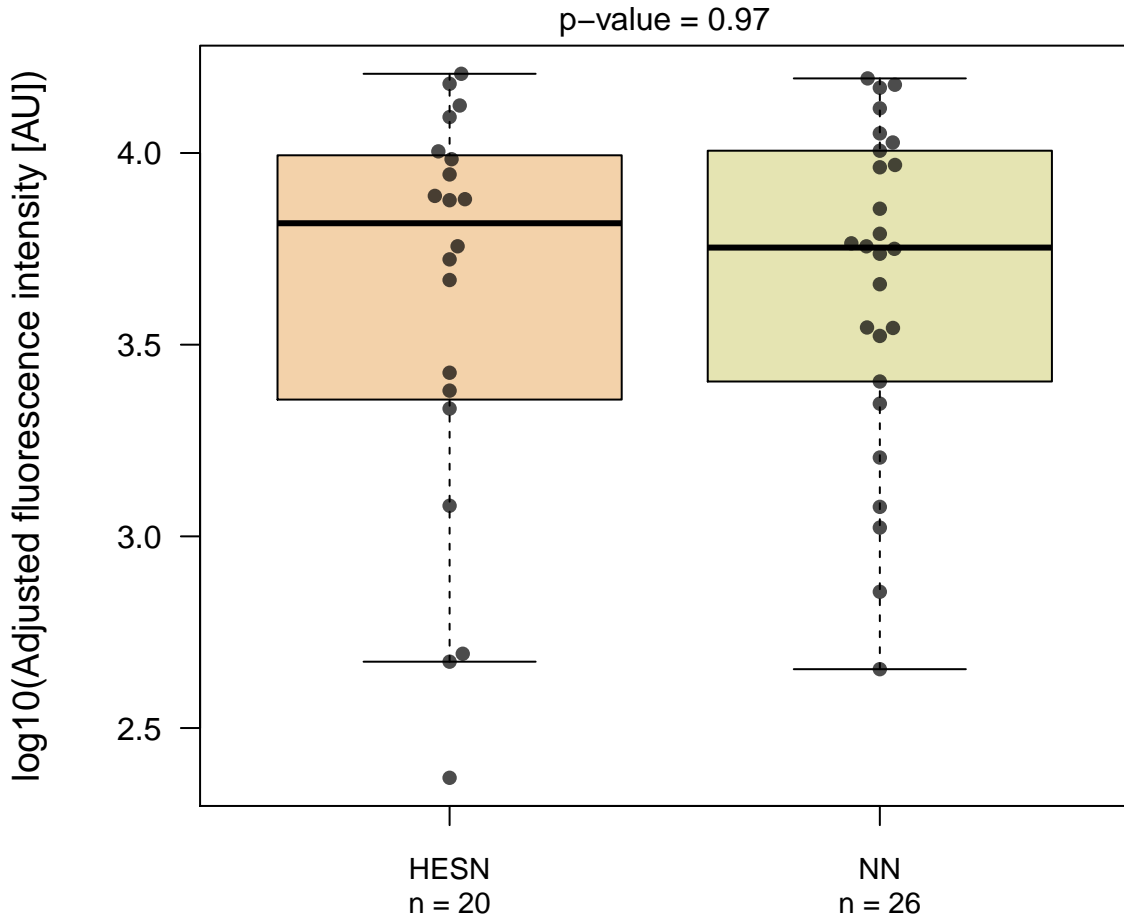

# STS

steroid sulfatase

Antibody: HPA002904

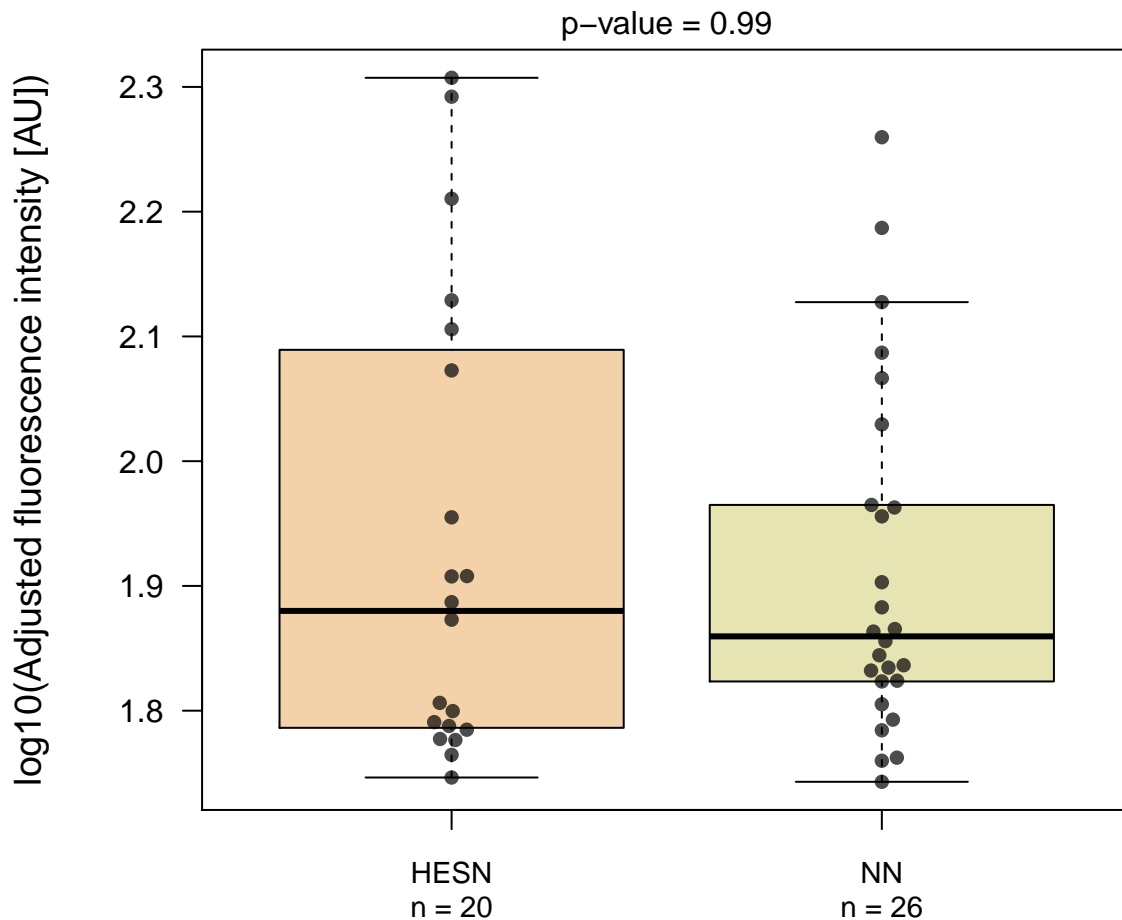



# DMKN

dermokine

Antibody: HPA029406

p-value = 0.99

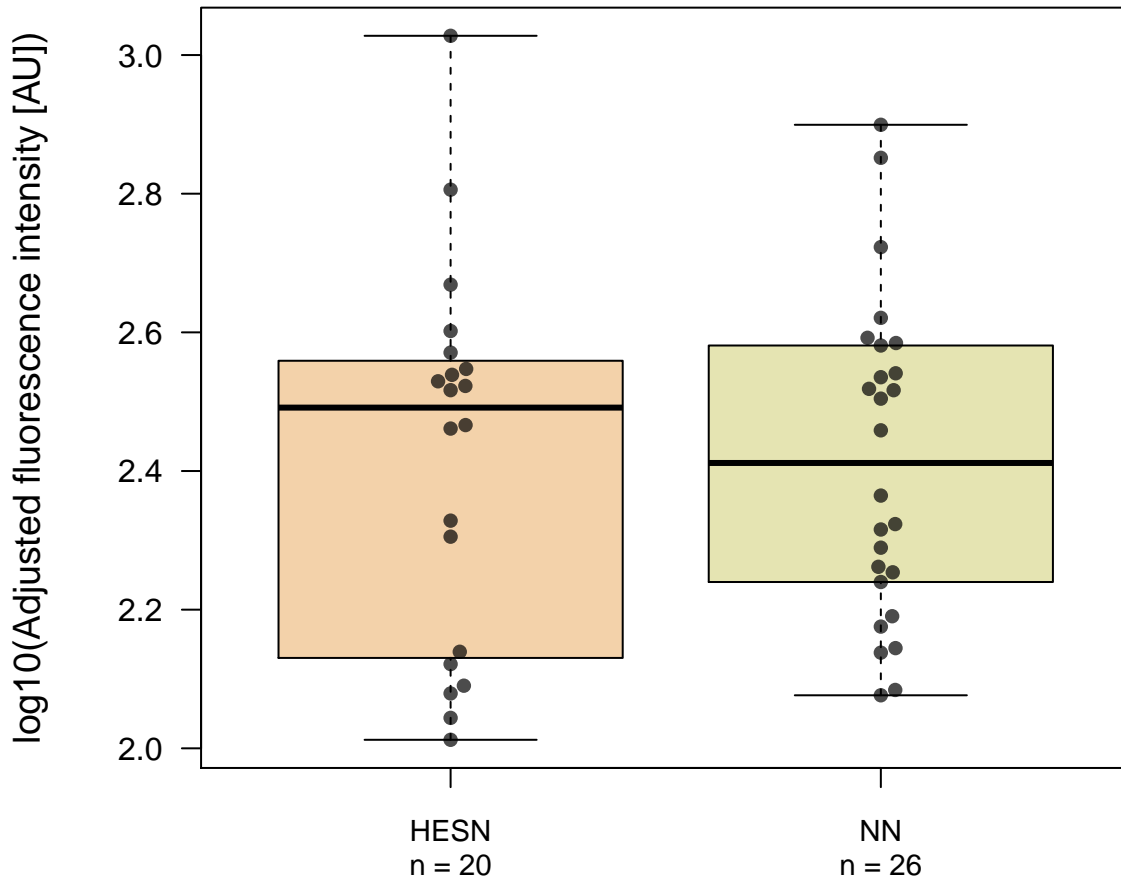

# MIF

macrophage migration inhibitory factor

Antibody: HPA003868

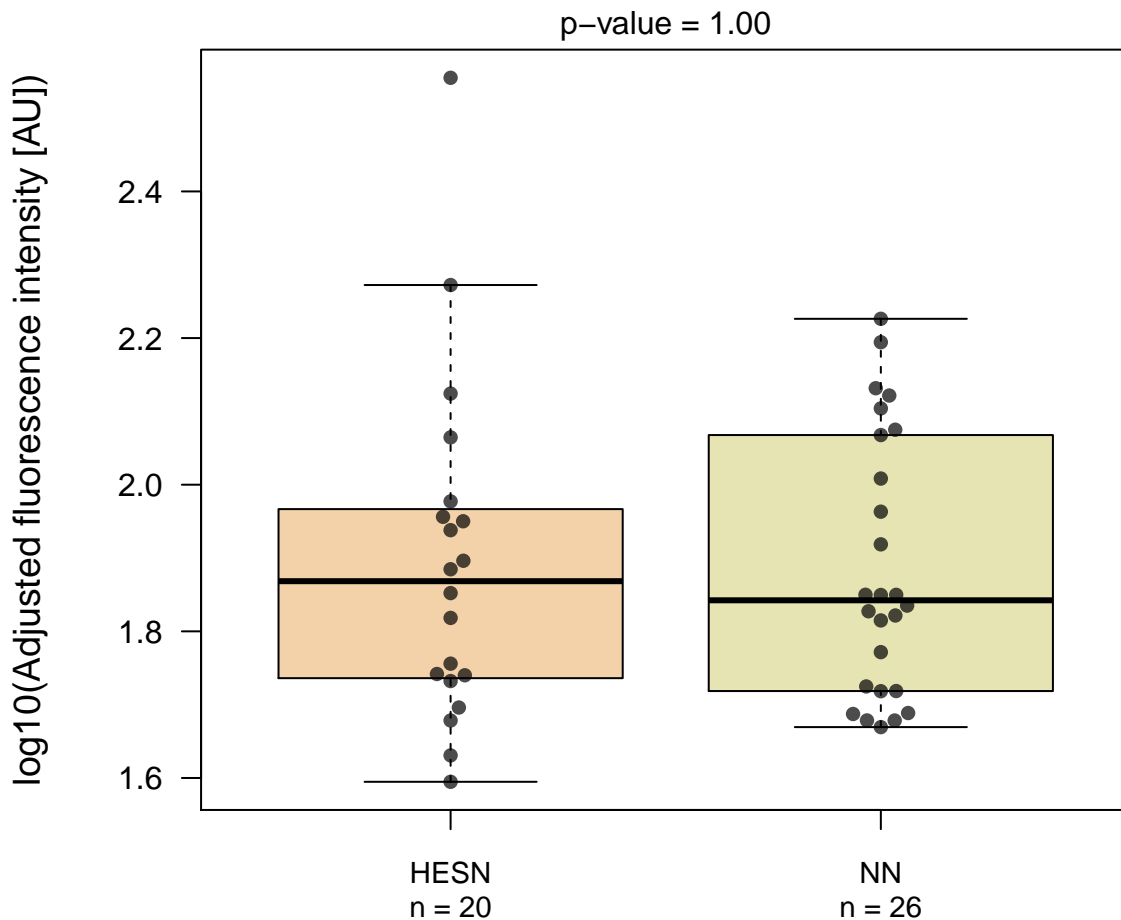

Supplement: s1 [file s1]
