# Supplementary material for: HIV-Exposed Seronegative Sex Workers Express Low T-Cell Activation and an Intact Ectocervical Tissue Microenvironment
Source: MDPI journal article supplement (doi:10.3390/vaccines9030217), 2021-03-04
Supplement: s1 [file s1]

**Table S2. Clinical characterization of study subjects (CMC analyses)**

|                                                      | HESN (n=20)                      | NN (n=11)                        | p-value |
|------------------------------------------------------|----------------------------------|----------------------------------|---------|
|                                                      | Median or number<br>(range or %) | Median or number<br>(range or %) |         |
| Age (years)                                          | 37 (32-48)                       | 33 (21-47)                       | ns      |
| Years since last pregnancy <sup>a</sup>              | 7 (1-19)                         | 8 (5-22)                         | ns      |
| Progesterone levels (ng/mL) <sup>b</sup>             | 3.6 (0.6-16.9)                   | 3.5 (0.1-16.4)                   | ns      |
| BV <sup>c</sup>                                      |                                  |                                  |         |
| Negative (0-3)                                       | 9 (45%)                          | 8 (73%)                          | ns      |
| Intermediate (4-6)                                   | 6 (30%)                          | 1 (9%)                           | ns      |
| Positive (7-10)                                      | 7 (25%)                          | 1 (9%)                           | ns      |
| Yeast infection                                      | 0 (0%)                           | 1(9%)                            | ns      |
| No. of clients last 7 days                           | 5 (2-50)                         | 3.5 (1-18)                       | ns      |
| No. of unprotected sex acts last 7 days <sup>d</sup> | 0 (0-6)                          | 0 (0-1)                          | ns      |
| Vaginal douching <sup>e</sup>                        | 10 (50%)                         | 4 (36%)                          | ns      |

Clinical characteristics at time of enrolment for the participants from whom CMC samples were available at the first sample time point.

ns= non-significant ( $p < 0.05$ ), Mann-Whitney *U* test and Fisher's exact test.

<sup>a</sup>Years since last pregnancy, including abortions; Data not available from 4 HESN and 1 NN participants, respectively.

<sup>b</sup>Progesterone levels at the time of first sample time point.

<sup>c</sup>BV: Bacterial vaginosis (Nugent's score, 1-10; Negative 0-3; Intermediate 4-6; Positive: 7-10), data not available from 1 NN participant

<sup>d</sup>Calculated based on self-reported use of condom with clients

<sup>e</sup>Any douching performed by inserting water, or water and soap, in the vagina since last study visit (approximately 2 weeks)
