# Supplementary material for: HIV-Exposed Seronegative Sex Workers Express Low T-Cell Activation and an Intact Ectocervical Tissue Microenvironment
Source: MDPI journal article supplement (doi:10.3390/vaccines9030217), 2021-03-04
Supplement: s1 [file s1]

| <b>Table S1.</b>                                | <b>Gene description</b>                               |               |                         |
|-------------------------------------------------|-------------------------------------------------------|---------------|-------------------------|
|                                                 | Gene description                                      | Uniprot ID    | Antibody                |
| <i>AHSG</i>                                     | alpha 2-HS glycoprotein                               | P02765        | HPA001524               |
| <i>ANXA1</i>                                    | annexin A1                                            | P04083        | HPA011918               |
| <i>ANXA3</i>                                    | annexin A3                                            | P12429        | HPA013431,<br>HPA013398 |
| <i>BCAP31</i>                                   | B cell receptor associated protein 31                 | P51572        | HPA003906               |
| <i>C4BPA</i>                                    | complement component 4 binding protein alpha          | P04003        | HPA001845               |
| <i>CAPN1</i>                                    | calpain 1                                             | P07384        | HPA005992               |
| <i>CAPN14</i>                                   | calpain 14                                            | A8MX76        | HPA067311               |
| <i>CAPNS1</i>                                   | calpain small subunit 1                               | P04632        | HPA006872               |
| <i>CD5L</i>                                     | CD5 molecule like                                     | O43866        | HPA026432               |
| <i>CFH</i>                                      | complement factor H                                   | P08603        | HPA049176               |
| <i>COL1A2</i>                                   | collagen type I alpha 2 chain                         | P08123        | HPA068464               |
| <i>CORO1A</i>                                   | coronin 1A                                            | P31146        | HPA051132               |
| <i>CRNN</i>                                     | cornulin                                              | Q9UBG3        | HPA024343               |
| <i>CSTA</i>                                     | cystatin A                                            | P01040        | HPA000392,<br>HPA001031 |
| <i>CSTB</i>                                     | cystatin B                                            | P04080        | HPA058557,<br>HPA017380 |
| <i>CTSG</i>                                     | cathepsin G                                           | P08311        | HPA047737               |
| <i>CXCL10</i>                                   | C-X-C motif chemokine ligand 10                       | P02778        | HPA029858               |
| <i>DEFA1;</i><br><i>DEFA1B;</i><br><i>DEFA3</i> | defensin alpha 1; defensin alpha 1B; defensin alpha 3 | P59665;P59666 | HPA044693               |
| <i>DEFA5</i>                                    | defensin alpha 5                                      | Q01523        | HPA015775               |
| <i>DMKN</i>                                     | dermokine                                             | Q6E0U4        | HPA029406               |
| <i>DSC2</i>                                     | desmocollin 2                                         | Q02487        | HPA012615               |
| <i>DSG1</i>                                     | desmoglein 1                                          | Q02413        | HPA022128               |
| <i>DSG3</i>                                     | desmoglein 3                                          | P32926        | HPA056863               |
| <i>ELANE</i>                                    | elastase, neutrophil expressed                        | P08246        | HPA066836               |
| <i>F11R</i>                                     | F11 receptor                                          | Q9Y624        | HPA061700               |
| <i>FGA</i>                                      | fibrinogen alpha chain                                | P02671        | HPA064755,<br>HPA051370 |
| <i>FLNA</i>                                     | filamin A                                             | P21333        | HPA002925,<br>HPA001115 |
| <i>GPX3</i>                                     | glutathione peroxidase 3                              | P22352        | HPA071520,<br>HPA062579 |
| <i>IFNG</i>                                     | interferon gamma                                      | P01579        | HPA049525               |
| <i>IL36G</i>                                    | interleukin 36 gamma                                  | Q9NZH8        | HPA055042               |
| <i>ITIH2</i>                                    | inter-alpha-trypsin inhibitor heavy chain 2           | P19823        | HPA059150,<br>HPA062964 |

|                 |                                           |        |                                       |
|-----------------|-------------------------------------------|--------|---------------------------------------|
| <i>KLK11</i>    | kallikrein related peptidase 11           | Q9UBX7 | HPA038938                             |
| <i>KNG1</i>     | kininogen 1                               | P01042 | HPA001616                             |
| <i>KRT1</i>     | keratin 1                                 | P04264 | HPA017917,<br>HPA019797,<br>HPA062908 |
| <i>KRT13</i>    | keratin 13                                | P13646 | HPA030877                             |
| <i>KRT14</i>    | keratin 14                                | P02533 | HPA023040                             |
| <i>KRT18</i>    | keratin 18                                | P05783 | HPA001605                             |
| <i>KRT4</i>     | keratin 4                                 | P19013 | HPA034881                             |
| <i>KRT5</i>     | keratin 5                                 | P13647 | HPA059479                             |
| <i>LDHA</i>     | lactate dehydrogenase A                   | P00338 | HPA075026                             |
| <i>LGMN</i>     | legumain                                  | Q99538 | HPA000799,<br>HPA001426               |
| <i>LOR</i>      | loricrin                                  | P23490 | HPA076123                             |
| <i>LRG1</i>     | leucine rich alpha-2-glycoprotein 1       | P02750 | HPA001888                             |
| <i>LSP1</i>     | lymphocyte-specific protein 1             | P33241 | HPA019693                             |
| <i>LYZ</i>      | lysozyme                                  | P61626 | HPA048284                             |
| <i>MIF</i>      | macrophage migration inhibitory factor    | P14174 | HPA003868                             |
| <i>MMP8</i>     | matrix metallopeptidase 8                 | P22894 | HPA022935                             |
| <i>MMP9</i>     | matrix metallopeptidase 9                 | P14780 | HPA063909                             |
| <i>MSN</i>      | moesin                                    | P26038 | HPA011135                             |
| <i>MUC16</i>    | mucin 16, cell surface associated         | Q8WXI7 | HPA065600                             |
| <i>MUC5AC</i>   | mucin 5AC, oligomeric mucus/gel-forming   | P98088 | HPA040615                             |
| <i>MYH9</i>     | myosin heavy chain 9                      | P35579 | HPA001644                             |
| <i>NCF2</i>     | neutrophil cytosolic factor 2             | P19878 | HPA002327,<br>HPA006040               |
| <i>PI3</i>      | peptidase inhibitor 3                     | P19957 | HPA017737                             |
| <i>PKP1</i>     | plakophilin 1                             | Q13835 | HPA027221                             |
| <i>PLAUR</i>    | plasminogen activator, urokinase receptor | Q03405 | HPA050843                             |
| <i>RPTN</i>     | repetin                                   | Q6XPR3 | HPA030485                             |
| <i>S100A12</i>  | S100 calcium binding protein A12          | P80511 | HPA002881,<br>HPA003620               |
| <i>S100A2</i>   | S100 calcium binding protein A2           | P29034 | HPA034651                             |
| <i>S100A6</i>   | S100 calcium binding protein A6           | P06703 | HPA008060                             |
| <i>S100P</i>    | S100 calcium binding protein P            | P25815 | HPA019502                             |
| <i>SERPINA1</i> | serpin family A member 1                  | P01009 | HPA001291                             |
| <i>SERPINA3</i> | serpin family A member 3                  | P01011 | HPA000893                             |
| <i>SERPINA6</i> | serpin family A member 6                  | P08185 | HPA017864                             |
| <i>SERPINB1</i> | serpin family B member 1                  | P30740 | HPA018871                             |
| <i>SERPINB5</i> | serpin family B member 5                  | P36952 | HPA019025,<br>HPA019132               |
| <i>SERPINB7</i> | serpin family B member 7                  | O75635 | HPA024200                             |

|                  |                                              |        |                         |
|------------------|----------------------------------------------|--------|-------------------------|
| <i>SERPING1</i>  | serpin family G member 1                     | P05155 | HPA048738               |
| <i>SPINK5</i>    | serine peptidase inhibitor, Kazal type 5     | Q9NQ38 | HPA011351,<br>HPA009067 |
| <i>SPRR3</i>     | small proline rich protein 3                 | Q9UBC9 | HPA024330,<br>HPA044467 |
| <i>STS</i>       | steroid sulfatase                            | P08842 | HPA002904               |
| <i>TACSTD2</i>   | tumor associated calcium signal transducer 2 | P09758 | HPA055067,<br>HPA043104 |
| <i>TMPRSS11E</i> | transmembrane serine protease 11E            | Q9UL52 | HPA051062               |
| <i>TXNDC17</i>   | thioredoxin domain containing 17             | Q9BRA2 | HPA022931               |

Protein targets were selected based on their presence in genital fluids and with associations to HIV resistance and inflammation [20], as well as identified as genes or proteins in studies on the effect of sex hormones and inflammation in the female genital tract [21-25].
